# Supplementary material for: Human Tissues Contain CD141hi Cross-Presenting Dendritic Cells with Functional Homology to Mouse CD103+ Nonlymphoid Dendritic Cells
Source: PubMed Central journal article supplement (PMC3476529; doi:10.1016/j.immuni.2012.04.012), 2012-07-27
Supplement: mmc2.pdf [file mmc2.pdf]

Table S2. Gene signatures for skin and blood DC subsets. The expression values for each gene were normalized by median-centering followed by division by the median absolute deviation (MAD). Genes from the signature of a given subtype that were located in the positive region of the normalized expression were considered up-regulated, and those in the negative region down-regulated.

**CD141 lineage (upregulated genes)**

| ENTREZ ID | Gene Symbol  | Gene Name                                                                                      |
|-----------|--------------|------------------------------------------------------------------------------------------------|
| 23677     | SH3BP4       | SH3-domain binding protein 4                                                                   |
| 2322      | FLT3         | fms-related tyrosine kinase 3                                                                  |
| 151888    | BTLA         | B and T lymphocyte associated                                                                  |
| 79630     | C1orf54      | chromosome 1 open reading frame 54                                                             |
| 9249      | DHRS3        | dehydrogenase/reductase (SDR family) member 3                                                  |
| 2317      | FLNB         | filamin B, beta                                                                                |
| 1803      | DPP4         | dipeptidyl-peptidase 4                                                                         |
| 274       | BIN1         | bridging integrator 1                                                                          |
| 1933      | EEF1B2       | eukaryotic translation elongation factor 1 beta 2                                              |
| 399665    | FAM102A      | family with sequence similarity 102, member A                                                  |
| 257144    | GCET2        | germinal center expressed transcript 2                                                         |
| 10576     | CCT2         | chaperonin containing TCP1, subunit 2 (beta)                                                   |
| 79656     | BEND5        | BEN domain containing 5                                                                        |
| 51107     | APH1A        | anterior pharynx defective 1 homolog A (C. elegans)                                            |
| 51205     | ACP6         | acid phosphatase 6, lysophosphatidic                                                           |
| 5993      | RFX5         | regulatory factor X, 5 (influences HLA class II expression)                                    |
| 3159      | HMGA1        | high mobility group AT-hook 1                                                                  |
| 8934      | RAB7L1       | RAB7, member RAS oncogene family-like 1                                                        |
| 27346     | TMEM97       | transmembrane protein 97                                                                       |
| 5747      | PTK2         | PTK2 protein tyrosine kinase 2                                                                 |
| 85453     | TSPYL5       | TSPY-like 5                                                                                    |
| 10263     | CDK2AP2      | cyclin-dependent kinase 2 associated protein 2                                                 |
| 23521     | RPL13A       | ribosomal protein L13a                                                                         |
| 6193      | RPS5         | ribosomal protein S5                                                                           |
| 1718      | DHCR24       | 24-dehydrocholesterol reductase                                                                |
| 6728      | SRP19        | signal recognition particle 19kDa                                                              |
| 638       | BIK          | BCL2-interacting killer (apoptosis-inducing)                                                   |
| 9855      | FARP2        | FERM, RhoGEF and pleckstrin domain protein 2                                                   |
| 79762     | C1orf115     | chromosome 1 open reading frame 115                                                            |
| 8575      | PRKRA        | protein kinase, interferon-inducible double stranded RNA dependent activator                   |
| 2788      | GNNG7        | guanine nucleotide binding protein (G protein), gamma 7                                        |
| 2120      | ETV6         | ets variant 6                                                                                  |
| 60481     | ELOVL5       | ELOVL family member 5, elongation of long chain fatty acids (FEN1/Elo2, SUR4/Elo3-like, yeast) |
| 388574    | FLJ43681     | ribosomal protein L23a pseudogene                                                              |
| 2852      | GPER         | G protein-coupled estrogen receptor 1                                                          |
| 5333      | PLCD1        | phospholipase C, delta 1                                                                       |
| 80183     | C13orf18     | chromosome 13 open reading frame 18                                                            |
| 4609      | MYC          | v-myc myelocytomatosis viral oncogene homolog (avian)                                          |
| 4724      | NDUFS4       | NADH dehydrogenase (ubiquinone) Fe-S protein 4, 18kDa (NADH-coenzyme Q reductase)              |
| 817       | CAMK2D       | calcium/calmodulin-dependent protein kinase II delta                                           |
| 9185      | REPS2        | RALBP1 associated Eps domain containing 2                                                      |
| 730101    | LOC730101    | hypothetical LOC730101                                                                         |
| 6721      | SREBF2       | sterol regulatory element binding transcription factor 2                                       |
| 220930    | LOC220930    | hypothetical LOC220930                                                                         |
| 4171      | MCM2         | minichromosome maintenance complex component 2                                                 |
| 6891      | TAP2         | transporter 2, ATP-binding cassette, sub-family B (MDR/TAP)                                    |
| 26031     | OSBPL3       | oxysterol binding protein-like 3                                                               |
| 587       | BCAT2        | branched chain amino-acid transaminase 2, mitochondrial                                        |
| 641455    | POTEM        | POTE ankyrin domain family, member M                                                           |
| 55227     | LRRC1        | leucine rich repeat containing 1                                                               |
| 25849     | PARM1        | prostate androgen-regulated mucin-like protein 1                                               |
| 6158      | RPL28        | ribosomal protein L28                                                                          |
| 1616      | DAXX         | death-domain associated protein                                                                |
| 10947     | AP3M2        | adaptor-related protein complex 3, mu 2 subunit                                                |
| 51571     | FAM49B       | family with sequence similarity 49, member B                                                   |
| 118433    | RPL23AP7     | ribosomal protein L23a pseudogene 7                                                            |
| 644511    | RPL13AP6     | ribosomal protein L13a pseudogene 6                                                            |
| 1021      | CDK6         | cyclin-dependent kinase 6                                                                      |
| 10666     | CD226        | CD226 molecule                                                                                 |
| 6228      | RPS23        | ribosomal protein S23                                                                          |
| 83988     | NCALD        | neurocalcin delta                                                                              |
| 25845     | LOC25845     | hypothetical LOC25845                                                                          |
| 51477     | ISYNA1       | inositol-3-phosphate synthase 1                                                                |
| 6132      | RPL8         | ribosomal protein L8                                                                           |
| 84057     | MND1         | meiotic nuclear divisions 1 homolog (S. cerevisiae)                                            |
| 8099      | CDK2AP1      | cyclin-dependent kinase 2 associated protein 1                                                 |
| 3066      | HDAC2        | histone deacetylase 2                                                                          |
| 9532      | BAG2         | BCL2-associated athanogene 2                                                                   |
| 4953      | ODC1         | ornithine decarboxylase 1                                                                      |
| 2833      | CXCR3        | chemokine (C-X-C motif) receptor 3                                                             |
| 6188      | RPS3         | ribosomal protein S3                                                                           |
| 8458      | TTF2         | transcription termination factor, RNA polymerase II                                            |
| 5167      | ENPP1        | ectonucleotide pyrophosphatase/phosphodiesterase 1                                             |
| 100289019 | LOC100289019 | hypothetical LOC100289019                                                                      |
| 28978     | TMEM14A      | transmembrane protein 14A                                                                      |
| 6608      | SMO          | smoothened homolog (Drosophila)                                                                |
| 1595      | CYP51A1      | cytochrome P450, family 51, subfamily A, polypeptide 1                                         |
| 2091      | FBL          | fibrillarin                                                                                    |
| 57211     | GPR126       | G protein-coupled receptor 126                                                                 |
| 11279     | KLF8         | Kruppel-like factor 8                                                                          |
| 5664      | PSEN2        | presenilin 2 (Alzheimer disease 4)                                                             |
| 79705     | LRRK1        | leucine-rich repeat kinase 1                                                                   |
| 6146      | RPL22        | ribosomal protein L22                                                                          |
| 3921      | RPSA         | ribosomal protein SA                                                                           |
| 28969     | BZW2         | basic leucine zipper and W2 domains 2                                                          |
| 285148    | IAH1         | isoamyl acetate-hydrolyzing esterase 1 homolog (S. cerevisiae)                                 |
| 7982      | ST7          | suppression of tumorigenicity 7                                                                |

|        |           |                                                                                                      |
|--------|-----------|------------------------------------------------------------------------------------------------------|
| 51559  | NT5DC3    | 5'-nucleotidase domain containing 3                                                                  |
| 10627  | MYL12A    | myosin, light chain 12A, regulatory, non-sarcomeric                                                  |
| 692158 | SNORA57   | small nucleolar RNA, H/ACA box 57                                                                    |
| 8665   | EIF3F     | eukaryotic translation initiation factor 3, subunit F                                                |
| 645683 | RPL13AP3  | ribosomal protein L13a pseudogene 3                                                                  |
| 999    | CDH1      | cadherin 1, type 1, E-cadherin (epithelial)                                                          |
| 445328 | ARHGEF35  | Rho guanine nucleotide exchange factor (GEF) 35                                                      |
| 219902 | TMEM136   | transmembrane protein 136                                                                            |
| 55300  | PI4K2B    | phosphatidylinositol 4-kinase type 2 beta                                                            |
| 5074   | PAWR      | PRKC, apoptosis, WT1, regulator                                                                      |
| 51320  | MEX3C     | mex-3 homolog C (C. elegans)                                                                         |
| 23394  | ADNP      | activity-dependent neuroprotector homeobox                                                           |
| 1937   | EEF1G     | eukaryotic translation elongation factor 1 gamma                                                     |
| 442421 | LOC442421 | hypothetical LOC442421                                                                               |
| 256355 | RPS2P32   | ribosomal protein S2 pseudogene 32                                                                   |
| 114883 | OSBPL9    | oxysterol binding protein-like 9                                                                     |
| 23555  | TSPAN15   | tetraspanin 15                                                                                       |
| 649946 | RPL23AP64 | ribosomal protein L23a pseudogene 64                                                                 |
| 29803  | REPIN1    | replication initiator 1                                                                              |
| 5590   | PRKCZ     | protein kinase C, zeta                                                                               |
| 10478  | SLC25A17  | solute carrier family 25 (mitochondrial carrier; peroxisomal membrane protein, 34kDa), member 17     |
| 6207   | RPS13     | ribosomal protein S13                                                                                |
| 55526  | DHTKD1    | dehydrogenase E1 and transketolase domain containing 1                                               |
| 5539   | PPY       | pancreatic polypeptide                                                                               |
| 155382 | VPS37D    | vacuolar protein sorting 37 homolog D (S. cerevisiae)                                                |
| 401911 | RPL29P33  | ribosomal protein L29 pseudogene 33                                                                  |
| 6124   | RPL4      | ribosomal protein L4                                                                                 |
| 729786 | GOLGA8C   | golgin A8 family, member C                                                                           |
| 56478  | EIF4ENIF1 | eukaryotic translation initiation factor 4E nuclear import factor 1                                  |
| 6144   | RPL21     | ribosomal protein L21                                                                                |
| 25873  | RPL36     | ribosomal protein L36                                                                                |
| 11142  | PKIG      | protein kinase (cAMP-dependent, catalytic) inhibitor gamma                                           |
| 6129   | RPL7      | ribosomal protein L7                                                                                 |
| 6875   | TAF4B     | TAF4b RNA polymerase II, TATA box binding protein (TBP)-associated factor, 105kDa                    |
| 10606  | PAICS     | phosphoribosylaminoimidazole carboxylase, phosphoribosylaminoimidazole succinocarboxamide synthetase |
| 653162 | RPSAP9    | ribosomal protein SA pseudogene 9                                                                    |
| 55068  | ENOX1     | ecto-NOX disulfide-thiol exchanger 1                                                                 |
| 57514  | ARHGAP31  | Rho GTPase activating protein 31                                                                     |
| 6147   | RPL23A    | ribosomal protein L23a                                                                               |
| 5425   | POLD2     | polymerase (DNA directed), delta 2, regulatory subunit 50kDa                                         |
| 1975   | EIF4B     | eukaryotic translation initiation factor 4B                                                          |
| 26354  | GNL3      | guanine nucleotide binding protein-like 3 (nucleolar)                                                |
| 9631   | NUP155    | nucleoporin 155kDa                                                                                   |
| 3815   | KIT       | v-kit Hardy-Zuckerman 4 feline sarcoma viral oncogene homolog                                        |
| 23354  | HAUS5     | HAUS augmin-like complex, subunit 5                                                                  |
| 79856  | SNX22     | sorting nexin 22                                                                                     |
| 7098   | TLR3      | toll-like receptor 3                                                                                 |
| 7371   | UCK2      | uridine-cytidine kinase 2                                                                            |
| 6659   | SOX4      | SRY (sex determining region Y)-box 4                                                                 |
| 54165  | DCUN1D1   | DCN1, defective in cullin neddylation 1, domain containing 1 (S. cerevisiae)                         |
| 57823  | SLAMF7    | SLAM family member 7                                                                                 |
| 4649   | MYO9A     | myosin IXA                                                                                           |
| 283345 | RPL13P5   | ribosomal protein L13 pseudogene 5                                                                   |
| 148    | ADRA1A    | adrenergic, alpha-1A-, receptor                                                                      |
| 90990  | KIFC2     | kinesin family member C2                                                                             |
| 57657  | HCN3      | hyperpolarization activated cyclic nucleotide-gated potassium channel 3                              |
| 6130   | RPL7A     | ribosomal protein L7a                                                                                |
| 6160   | RPL31     | ribosomal protein L31                                                                                |
| 2529   | FUT7      | fucosyltransferase 7 (alpha (1,3) fucosyltransferase)                                                |
| 51474  | LIMA1     | LIM domain and actin binding 1                                                                       |
| 867    | CBL       | Cas-BR-M (murine) ecotropic retroviral transforming sequence                                         |
| 1994   | ELAVL1    | ELAV (embryonic lethal, abnormal vision, Drosophila)-like 1 (Hu antigen R)                           |
| 9552   | SPAG7     | sperm associated antigen 7                                                                           |
| 79885  | HDAC11    | histone deacetylase 11                                                                               |
| 11224  | RPL35     | ribosomal protein L35                                                                                |
| 256236 | NAPSB     | napsin B aspartic peptidase pseudogene                                                               |
| 440    | ASNS      | asparagine synthetase (glutamine-hydrolyzing)                                                        |
| 6920   | TCEA3     | transcription elongation factor A (SII), 3                                                           |
| 10866  | HCP5      | HLA complex P5                                                                                       |
| 60     | ACTB      | actin, beta                                                                                          |
| 9045   | RPL14     | ribosomal protein L14                                                                                |
| 23705  | CADM1     | cell adhesion molecule 1                                                                             |
| 6159   | RPL29     | ribosomal protein L29                                                                                |
| 29074  | MRPL18    | mitochondrial ribosomal protein L18                                                                  |
| 78999  | LRFN4     | leucine rich repeat and fibronectin type III domain containing 4                                     |
| 81552  | VOPP1     | vesicular, overexpressed in cancer, prosurvival protein 1                                            |
| 4065   | LY75      | lymphocyte antigen 75                                                                                |
| 7405   | UVRAG     | UV radiation resistance associated gene                                                              |
| 7419   | VDAC3     | voltage-dependent anion channel 3                                                                    |
| 9727   | RAB11FIP3 | RAB11 family interacting protein 3 (class II)                                                        |
| 8407   | TAGLN2    | transgelin 2                                                                                         |
| 6189   | RPS3A     | ribosomal protein S3A                                                                                |
| 8502   | PKP4      | plakophilin 4                                                                                        |
| 57475  | PLEKH1H1  | pleckstrin homology domain containing, family H (with MyTH4 domain) member 1                         |
| 6892   | TAPBP     | TAP binding protein (tapasin)                                                                        |
| 5250   | SLC25A3   | solute carrier family 25 (mitochondrial carrier; phosphate carrier), member 3                        |
| 1431   | CS        | citrate synthase                                                                                     |
| 79002  | C19orf43  | chromosome 19 open reading frame 43                                                                  |
| 27013  | C2orf24   | chromosome 2 open reading frame 24                                                                   |
| 6626   | SNRPA     | small nuclear ribonucleoprotein polypeptide A                                                        |
| 201725 | C4orf46   | chromosome 4 open reading frame 46                                                                   |
| 56954  | NIT2      | nitrilase family, member 2                                                                           |
| 153769 | SH3RF2    | SH3 domain containing ring finger 2                                                                  |
| 64084  | CLSTN2    | calsyntenin 2                                                                                        |
| 1501   | CTNND2    | catenin (cadherin-associated protein), delta 2 (neural plakophilin-related arm-repeat protein)       |

|           |              |                                                                                          |
|-----------|--------------|------------------------------------------------------------------------------------------|
| 100505501 | LOC100505501 | hypothetical LOC100505501                                                                |
| 6122      | RPL3         | ribosomal protein L3                                                                     |
| 3064      | HTT          | huntingtin                                                                               |
| 729739    | LOC729739    | hypothetical LOC729739                                                                   |
| 3426      | CFI          | complement factor I                                                                      |
| 9402      | GRAP2        | GRB2-related adaptor protein 2                                                           |
| 908       | CCT6A        | chaperonin containing TCP1, subunit 6A (zeta 1)                                          |
| 54893     | MTMR10       | myotubularin related protein 10                                                          |
| 57106     | NAT14        | N-acetyltransferase 14 (GCN5-related, putative)                                          |
| 116449    | CLNK         | cytokine-dependent hematopoietic cell linker                                             |
| 6205      | RPS11        | ribosomal protein S11                                                                    |
| 5170      | PDPK1        | 3-phosphoinositide dependent protein kinase-1                                            |
| 6202      | RPS8         | ribosomal protein S8                                                                     |
| 51268     | PIPOX        | pipecolic acid oxidase                                                                   |
| 56623     | INPP5E       | inositol polyphosphate-5-phosphatase, 72 kDa                                             |
| 55911     | APOBR        | apolipoprotein B receptor                                                                |
| 64110     | MAGEF1       | melanoma antigen family F, 1                                                             |
| 55964     | SEPT3        | septin 3                                                                                 |
| 5709      | PSMD3        | proteasome (prosome, macropain) 26S subunit, non-ATPase, 3                               |
| 10428     | CFDP1        | craniofacial development protein 1                                                       |
| 56924     | PAK6         | p21 protein (Cdc42/Rac)-activated kinase 6                                               |
| 55691     | FRMD4A       | FERM domain containing 4A                                                                |
| 23002     | DAAM1        | dishevelled associated activator of morphogenesis 1                                      |
| 6157      | RPL27A       | ribosomal protein L27a                                                                   |
| 4882      | NPR2         | natriuretic peptide receptor B/guanylate cyclase B (atrionatriuretic peptide receptor B) |
| 10943     | MSL3         | male-specific lethal 3 homolog (Drosophila)                                              |
| 23122     | CLASP2       | cytoplasmic linker associated protein 2                                                  |
| 7307      | U2AF1        | U2 small nuclear RNA auxiliary factor 1                                                  |
| 201895    | C4orf34      | chromosome 4 open reading frame 34                                                       |
| 8481      | OFD1         | oral-facial-digital syndrome 1                                                           |
| 51602     | NOP58        | NOP58 ribonucleoprotein homolog (yeast)                                                  |
| 283420    | CLEC9A       | C-type lectin domain family 9, member A                                                  |
| 51614     | ERGIC3       | ERGIC and golgi 3                                                                        |
| 440712    | C1orf186     | chromosome 1 open reading frame 186                                                      |
| 100128252 | LOC100128252 | hypothetical LOC100128252                                                                |
| 283248    | RCOR2        | REST corepressor 2                                                                       |
| 57128     | LYRM4        | LYR motif containing 4                                                                   |
| 10694     | CCT8         | chaperonin containing TCP1, subunit 8 (theta)                                            |
| 100507547 | LOC100507547 | hypothetical LOC100507547                                                                |
| 145508    | C14orf145    | chromosome 14 open reading frame 145                                                     |
| 8766      | RAB11A       | RAB11A, member RAS oncogene family                                                       |
| 126669    | SHE          | Src homology 2 domain containing E                                                       |
| 729086    | LOC729086    | vesicular, overexpressed in cancer, prosurvival protein 1-like                           |
| 100510519 | LOC100510519 | HLA class II histocompatibility antigen, DR beta 4 chain-like                            |
| 9760      | TOX          | thymocyte selection-associated high mobility group box                                   |
| 282618    | IL29         | interleukin 29 (interferon, lambda 1)                                                    |
| 5757      | PTMA         | prothymosin, alpha                                                                       |
| 23234     | DNAJC9       | DnaJ (Hsp40) homolog, subfamily C, member 9                                              |
| 6194      | RPS6         | ribosomal protein S6                                                                     |
| 54503     | ZDHHC13      | zinc finger, DHHC-type containing 13                                                     |
| 23308     | ICOSLG       | inducible T-cell co-stimulator ligand                                                    |
| 8724      | SNX3         | sorting nexin 3                                                                          |
| 23165     | NUP205       | nucleoporin 205kDa                                                                       |
| 374650    | GOLGA6L5     | golgin A6 family-like 5 (pseudogene)                                                     |
| 148523    | C1orf51      | chromosome 1 open reading frame 51                                                       |
| 10360     | NPM3         | nucleophosmin/nucleoplasmin 3                                                            |
| 22903     | BTBD3        | BTB (POZ) domain containing 3                                                            |
| 55614     | KIF16B       | kinesin family member 16B                                                                |
| 8611      | PPAP2A       | phosphatidic acid phosphatase type 2A                                                    |
| 728658    | RPL13AP5     | ribosomal protein L13a pseudogene 5                                                      |
| 100131205 | RPL21P28     | ribosomal protein L21 pseudogene 28                                                      |
| 6181      | RPLP2        | ribosomal protein, large, P2                                                             |
| 220963    | SLC16A9      | solute carrier family 16, member 9 (monocarboxylic acid transporter 9)                   |
| 389114    | ZNF662       | zinc finger protein 662                                                                  |
| 79085     | SLC25A23     | solute carrier family 25 (mitochondrial carrier; phosphate carrier), member 23           |
| 6732      | SRPK1        | SRSF protein kinase 1                                                                    |
| 79791     | FBXO31       | F-box protein 31                                                                         |
| 6141      | RPL18        | ribosomal protein L18                                                                    |
| 339324    | ZNF260       | zinc finger protein 260                                                                  |
| 6137      | RPL13        | ribosomal protein L13                                                                    |
| 23107     | MRPS27       | mitochondrial ribosomal protein S27                                                      |
| 6152      | RPL24        | ribosomal protein L24                                                                    |
| 2281      | FKBP1B       | FK506 binding protein 1B, 12.6 kDa                                                       |
| 84707     | BEX2         | brain expressed X-linked 2                                                               |
| 6001      | RGS10        | regulator of G-protein signaling 10                                                      |
| 51692     | CPSF3        | cleavage and polyadenylation specific factor 3, 73kDa                                    |
| 54897     | CASZ1        | castor zinc finger 1                                                                     |
| 56265     | CPXM1        | carboxypeptidase X (M14 family), member 1                                                |
| 84433     | CARD11       | caspase recruitment domain family, member 11                                             |
| 5168      | ENPP2        | ectonucleotide pyrophosphatase/phosphodiesterase 2                                       |
| 3925      | STMN1        | stathmin 1                                                                               |
| 4642      | MYO1D        | myosin ID                                                                                |
| 2107      | ETF1         | eukaryotic translation termination factor 1                                              |
| 55619     | DOCK10       | dedicator of cytokinesis 10                                                              |
| 115290    | FBXO17       | F-box protein 17                                                                         |
| 689       | BTF3         | basic transcription factor 3                                                             |
| 6210      | RPS15A       | ribosomal protein S15a                                                                   |
| 3111      | HLA-DOA      | major histocompatibility complex, class II, DO alpha                                     |
| 1632      | DCI          | dodecenoyl-CoA isomerase                                                                 |
| 4173      | MCM4         | minichromosome maintenance complex component 4                                           |
| 5335      | PLCG1        | phospholipase C, gamma 1                                                                 |
| 5364      | PLXNB1       | plexin B1                                                                                |
| 29121     | CLEC2D       | C-type lectin domain family 2, member D                                                  |
| 57591     | MKL1         | megakaryoblastic leukemia (translocation) 1                                              |
| 9126      | SMC3         | structural maintenance of chromosomes 3                                                  |

|        |            |                                                                                                                |
|--------|------------|----------------------------------------------------------------------------------------------------------------|
| 5478   | PPIA       | peptidylprolyl isomerase A (cyclophilin A)                                                                     |
| 125144 | NCRNA00188 | non-protein coding RNA 188                                                                                     |
| 728643 | LOC728643  | heterogeneous nuclear ribonucleoprotein A1 pseudogene                                                          |
| 81620  | CDT1       | chromatin licensing and DNA replication factor 1                                                               |
| 388564 | LOC388564  | hypothetical protein LOC388564                                                                                 |
| 10093  | ARPC4      | actin related protein 2/3 complex, subunit 4, 20kDa                                                            |
| 57507  | ZNF608     | zinc finger protein 608                                                                                        |
| 81544  | GDPD5      | glycerophosphodiester phosphodiesterase domain containing 5                                                    |
| 6175   | RPLP0      | ribosomal protein, large, P0                                                                                   |
| 84067  | FAM160A2   | family with sequence similarity 160, member A2                                                                 |
| 6230   | RPS25      | ribosomal protein S25                                                                                          |
| 286077 | FAM83H     | family with sequence similarity 83, member H                                                                   |
| 607    | BCL9       | B-cell CLL/lymphoma 9                                                                                          |
| 6209   | RPS15      | ribosomal protein S15                                                                                          |
| 23623  | RUSC1      | RUN and SH3 domain containing 1                                                                                |
| 2531   | KDSR       | 3-ketodihydroshingosine reductase                                                                              |
| 6233   | RPS27A     | ribosomal protein S27a                                                                                         |
| 158405 | KIAA1958   | KIAA1958                                                                                                       |
| 8971   | H1FX       | H1 histone family, member X                                                                                    |
| 991    | CDC20      | cell division cycle 20 homolog (S. cerevisiae)                                                                 |
| 6138   | RPL15      | ribosomal protein L15                                                                                          |
| 55218  | EXD2       | exonuclease 3'-5' domain containing 2                                                                          |
| 286102 | TMED10P1   | transmembrane emp24-like trafficking protein 10 (yeast) pseudogene 1                                           |
| 6235   | RPS29      | ribosomal protein S29                                                                                          |
| 6047   | RNF4       | ring finger protein 4                                                                                          |
| 6804   | STX1A      | syntaxin 1A (brain)                                                                                            |
| 116159 | CYYR1      | cysteine/tyrosine-rich 1                                                                                       |
| 3190   | HNRNPK     | heterogeneous nuclear ribonucleoprotein K                                                                      |
| 11104  | KATNA1     | katanin p60 (ATPase containing) subunit A 1                                                                    |
| 6176   | RPLP1      | ribosomal protein, large, P1                                                                                   |
| 80063  | ATF7IP2    | activating transcription factor 7 interacting protein 2                                                        |
| 8669   | EIF3J      | eukaryotic translation initiation factor 3, subunit J                                                          |
| 23483  | TGDS       | TDP-glucose 4,6-dehydratase                                                                                    |
| 8975   | USP13      | ubiquitin specific peptidase 13 (isopeptidase T-3)                                                             |
| 2829   | XCR1       | chemokine (C motif) receptor 1                                                                                 |
| 57060  | PCBP4      | poly(rC) binding protein 4                                                                                     |
| 79657  | RPAP3      | RNA polymerase II associated protein 3                                                                         |
| 51203  | NUSAP1     | nucleolar and spindle associated protein 1                                                                     |
| 8664   | EIF3D      | eukaryotic translation initiation factor 3, subunit D                                                          |
| 6136   | RPL12      | ribosomal protein L12                                                                                          |
| 6171   | RPL41      | ribosomal protein L41                                                                                          |
| 401884 | MGC57346   | hypothetical LOC401884                                                                                         |
| 10100  | TSPAN2     | tetraspanin 2                                                                                                  |
| 57037  | ANKMY2     | ankyrin repeat and MYND domain containing 2                                                                    |
| 9991   | ROD1       | ROD1 regulator of differentiation 1 (S. pombe)                                                                 |
| 5901   | RAN        | RAN, member RAS oncogene family                                                                                |
| 2948   | GSTM4      | glutathione S-transferase mu 4                                                                                 |
| 134    | ADORA1     | adenosine A1 receptor                                                                                          |
| 9871   | SEC24D     | SEC24 family, member D (S. cerevisiae)                                                                         |
| 81793  | TLR10      | toll-like receptor 10                                                                                          |
| 109    | ADCY3      | adenylate cyclase 3                                                                                            |
| 55509  | BATF3      | basic leucine zipper transcription factor, ATF-like 3                                                          |
| 339005 | WHAMML1    | WAS protein homolog associated with actin, golgi membranes and microtubules-like 1 (pseudogene)                |
| 126668 | TDRD10     | tudor domain containing 10                                                                                     |
| 10810  | WASF3      | WAS protein family, member 3                                                                                   |
| 57705  | WDFY4      | WDFY family member 4                                                                                           |
| 3615   | IMPDH2     | IMP (inosine 5'-monophosphate) dehydrogenase 2                                                                 |
| 81539  | SLC38A1    | solute carrier family 38, member 1                                                                             |
| 57579  | FAM135A    | family with sequence similarity 135, member A                                                                  |
| 56969  | RPL23AP32  | ribosomal protein L23a pseudogene 32                                                                           |
| 7570   | ZNF22      | zinc finger protein 22 (KOX 15)                                                                                |
| 10505  | SEMA4F     | sema domain, immunoglobulin domain(Ig), transmembrane domain(TM) and short cytoplasmic domain, (semaphorin) 4F |
| 170960 | ZNF721     | zinc finger protein 721                                                                                        |
| 3902   | LAG3       | lymphocyte-activation gene 3                                                                                   |
| 196996 | GRAMD2     | GRAM domain containing 2                                                                                       |
| 50628  | GEMIN4     | gem (nuclear organelle) associated protein 4                                                                   |
| 55697  | VAC14      | Vac14 homolog (S. cerevisiae)                                                                                  |
| 283683 | LOC283683  | hypothetical LOC283683                                                                                         |
| 865    | CBFB       | core-binding factor, beta subunit                                                                              |
| 6168   | RPL37A     | ribosomal protein L37a                                                                                         |
| 2950   | GSTP1      | glutathione S-transferase pi 1                                                                                 |
| 9889   | ZBED4      | zinc finger, BED-type containing 4                                                                             |
| 80728  | ARHGAP39   | Rho GTPase activating protein 39                                                                               |
| 23231  | SEL1L3     | sel-1 suppressor of lin-12-like 3 (C. elegans)                                                                 |
| 8318   | CDC45      | cell division cycle 45 homolog (S. cerevisiae)                                                                 |
| 9349   | RPL23      | ribosomal protein L23                                                                                          |
| 646567 | LOC646567  | oligosaccharyltransferase complex subunit OSTC-like                                                            |
| 51199  | NIN        | ninein (GSK3B interacting protein)                                                                             |
| 9319   | TRIP13     | thyroid hormone receptor interactor 13                                                                         |
| 253769 | WDR27      | WD repeat domain 27                                                                                            |
| 2944   | GSTM1      | glutathione S-transferase mu 1                                                                                 |
| 6187   | RPS2       | ribosomal protein S2                                                                                           |
| 3092   | HIP1       | huntingtin interacting protein 1                                                                               |
| 152559 | PAQR3      | progesterin and adipoQ receptor family member III                                                              |
| 5863   | RGL2       | ral guanine nucleotide dissociation stimulator-like 2                                                          |
| 10236  | HNRNPR     | heterogeneous nuclear ribonucleoprotein R                                                                      |
| 6134   | RPL10      | ribosomal protein L10                                                                                          |
| 2926   | GRSF1      | G-rich RNA sequence binding factor 1                                                                           |
| 79697  | C14orf169  | chromosome 14 open reading frame 169                                                                           |
| 84451  | KIAA1804   | mixed lineage kinase 4                                                                                         |
| 1465   | CSRP1      | cysteine and glycine-rich protein 1                                                                            |
| 26003  | GORASP2    | golgi reassembly stacking protein 2, 55kDa                                                                     |
| 57600  | FNIP2      | folliculin interacting protein 2                                                                               |
| 162979 | ZNF296     | zinc finger protein 296                                                                                        |
| 23264  | ZC3H7B     | zinc finger CCCH-type containing 7B                                                                            |

|           |              |                                                                                                        |
|-----------|--------------|--------------------------------------------------------------------------------------------------------|
| 387066    | SNHG5        | small nucleolar RNA host gene 5 (non-protein coding)                                                   |
| 6201      | RPS7         | ribosomal protein S7                                                                                   |
| 404785    | POTEG        | POTE ankyrin domain family, member G                                                                   |
| 100188949 | LOC100188949 | hypothetical LOC100188949                                                                              |
| 116028    | C16orf75     | chromosome 16 open reading frame 75                                                                    |
| 11340     | EXOSC8       | exosome component 8                                                                                    |
| 123228    | SEN8         | SUMO/sentrin specific peptidase family member 8                                                        |
| 4839      | NOP2         | NOP2 nucleolar protein homolog (yeast)                                                                 |
| 80142     | PTGES2       | prostaglandin E synthase 2                                                                             |
| 80145     | THOC7        | THO complex 7 homolog (Drosophila)                                                                     |
| 2781      | GNAZ         | guanine nucleotide binding protein (G protein), alpha z polypeptide                                    |
| 262       | AMD1         | adenosylmethionine decarboxylase 1                                                                     |
| 166614    | DCLK2        | doublecortin-like kinase 2                                                                             |
| 1000      | CDH2         | cadherin 2, type 1, N-cadherin (neuronal)                                                              |
| 6155      | RPL27        | ribosomal protein L27                                                                                  |
| 2194      | FASN         | fatty acid synthase                                                                                    |
| 283102    | FLJ46111     | keratin 8 pseudogene                                                                                   |
| 7984      | ARHGEF5      | Rho guanine nucleotide exchange factor (GEF) 5                                                         |
| 5037      | PEBP1        | phosphatidylethanolamine binding protein 1                                                             |
| 23151     | GRAMD4       | GRAM domain containing 4                                                                               |
| 100130613 | CXorf64      | chromosome X open reading frame 64                                                                     |
| 6421      | SFPQ         | splicing factor proline/glutamine-rich                                                                 |
| 476       | ATP1A1       | ATPase, Na+/K+ transporting, alpha 1 polypeptide                                                       |
| 51678     | MPP6         | membrane protein, palmitoylated 6 (MAGUK p55 subfamily member 6)                                       |
| 10106     | CTDSP2       | CTD (carboxy-terminal domain, RNA polymerase II, polypeptide A) small phosphatase 2                    |
| 8869      | ST3GAL5      | ST3 beta-galactoside alpha-2,3-sialyltransferase 5                                                     |
| 1503      | CTPS         | CTP synthase                                                                                           |
| 6242      | RTKN         | rhotekin                                                                                               |
| 3146      | HMGB1        | high-mobility group box 1                                                                              |
| 1350      | COX7C        | cytochrome c oxidase subunit VIIc                                                                      |
| 9978      | RBX1         | ring-box 1, E3 ubiquitin protein ligase                                                                |
| 27316     | RBMX         | RNA binding motif protein, X-linked                                                                    |
| 11332     | ACOT7        | acyl-CoA thioesterase 7                                                                                |
| 51639     | SF3B14       | splicing factor 3B, 14 kDa subunit                                                                     |
| 10009     | ZBTB33       | zinc finger and BTB domain containing 33                                                               |
| 3006      | HIST1H1C     | histone cluster 1, H1c                                                                                 |
| 344148    | NCKAP5       | NCK-associated protein 5                                                                               |
| 4799      | NFX1         | nuclear transcription factor, X-box binding 1                                                          |
| 343477    | HSP90B3P     | heat shock protein 90kDa beta (Grp94), member 3 (pseudogene)                                           |
| 6389      | SDHA         | succinate dehydrogenase complex, subunit A, flavoprotein (Fp)                                          |
| 5176      | SERPINF1     | serpin peptidase inhibitor, clade F (alpha-2 antiplasmin, pigment epithelium derived factor), member 1 |
| 3418      | IDH2         | isocitrate dehydrogenase 2 (NADP+), mitochondrial                                                      |
| 84660     | CCDC62       | coiled-coil domain containing 62                                                                       |
| 1139      | CHRNA7       | cholinergic receptor, nicotinic, alpha 7                                                               |
| 6161      | RPL32        | ribosomal protein L32                                                                                  |
| 79877     | DCAKD        | dephospho-CoA kinase domain containing                                                                 |
| 1265      | CNN2         | calponin 2                                                                                             |
| 51339     | DACT1        | dapper, antagonist of beta-catenin, homolog 1 (Xenopus laevis)                                         |
| 121268    | RHEBL1       | Ras homolog enriched in brain like 1                                                                   |
| 55915     | LANCL2       | LanC lantibiotic synthetase component C-like 2 (bacterial)                                             |
| 85015     | USP45        | ubiquitin specific peptidase 45                                                                        |
| 2729      | GCLC         | glutamate-cysteine ligase, catalytic subunit                                                           |
| 6206      | RPS12        | ribosomal protein S12                                                                                  |
| 9333      | TGM5         | transglutaminase 5                                                                                     |
| 55959     | SULF2        | sulfatase 2                                                                                            |
| 440563    | LOC440563    | heterogeneous nuclear ribonucleoprotein C-like                                                         |
| 6229      | RPS24        | ribosomal protein S24                                                                                  |
| 100289079 | LOC100289079 | 60S ribosomal protein L36-like                                                                         |
| 55276     | PGM2         | phosphoglucomutase 2                                                                                   |
| 65250     | C5orf42      | chromosome 5 open reading frame 42                                                                     |
| 4673      | NAP1L1       | nucleosome assembly protein 1-like 1                                                                   |
| 57026     | PDXP         | pyridoxal (pyridoxine, vitamin B6) phosphatase                                                         |
| 6196      | RPS6KA2      | ribosomal protein S6 kinase, 90kDa, polypeptide 2                                                      |
| 84617     | TUBB6        | tubulin, beta 6                                                                                        |
| 8850      | KAT2B        | K(lysine) acetyltransferase 2B                                                                         |
| 5134      | PDCD2        | programmed cell death 2                                                                                |
| 401647    | GOLGA7B      | golgin A7 family, member B                                                                             |
| 23390     | ZDHH17       | zinc finger, DHHC-type containing 17                                                                   |
| 148789    | B3GALNT2     | beta-1,3-N-acetylgalactosaminyltransferase 2                                                           |
| 440574    | C1orf151     | chromosome 1 open reading frame 151                                                                    |
| 338440    | ANO9         | anoctamin 9                                                                                            |
| 84275     | SLC25A33     | solute carrier family 25, member 33                                                                    |
| 343413    | FCRL6        | Fc receptor-like 6                                                                                     |
| 2286      | FKBP2        | FK506 binding protein 2, 13kDa                                                                         |
| 56922     | MCCC1        | methylcrotonoyl-CoA carboxylase 1 (alpha)                                                              |
| 4723      | NDUFB1       | NADH dehydrogenase (ubiquinone) flavoprotein 1, 51kDa                                                  |
| 3490      | IGFBP7       | insulin-like growth factor binding protein 7                                                           |
| 8634      | RTCD1        | RNA terminal phosphate cyclase domain 1                                                                |
| 6814      | STXB3        | syntaxin binding protein 3                                                                             |
| 79174     | CRELD2       | cysteine-rich with EGF-like domains 2                                                                  |
| 10845     | CLPX         | ClpX caseinolytic peptidase X homolog (E. coli)                                                        |
| 80758     | PRR7         | proline rich 7 (synaptic)                                                                              |
| 10096     | ACTR3        | ARP3 actin-related protein 3 homolog (yeast)                                                           |
| 692148    | SCARNA10     | small Cajal body-specific RNA 10                                                                       |
| 8349      | HIST2H2BE    | histone cluster 2, H2be                                                                                |
| 6143      | RPL19        | ribosomal protein L19                                                                                  |
| 25904     | CNOT10       | CCR4-NOT transcription complex, subunit 10                                                             |
| 7411      | VBP1         | von Hippel-Lindau binding protein 1                                                                    |
| 64073     | C19orf33     | chromosome 19 open reading frame 33                                                                    |
| 6191      | RPS4X        | ribosomal protein S4, X-linked                                                                         |
| 23762     | OSBP2        | oxysterol binding protein 2                                                                            |
| 55922     | NKRF         | NFKB repressing factor                                                                                 |
| 3275      | PRMT2        | protein arginine methyltransferase 2                                                                   |
| 9651      | PLCH2        | phospholipase C, eta 2                                                                                 |
| 9394      | HS6ST1       | heparan sulfate 6-O-sulfotransferase 1                                                                 |

|        |           |                                                                                             |
|--------|-----------|---------------------------------------------------------------------------------------------|
| 376693 | RPS10P7   | ribosomal protein S10 pseudogene 7                                                          |
| 728743 | LOC728743 | similar to GLI-Kruppel family member HKR1                                                   |
| 6234   | RPS28     | ribosomal protein S28                                                                       |
| 4736   | RPL10A    | ribosomal protein L10a                                                                      |
| 9377   | COX5A     | cytochrome c oxidase subunit Va                                                             |
| 23157  | SEPT6     | septin 6                                                                                    |
| 9025   | RNF8      | ring finger protein 8                                                                       |
| 51011  | FAHD2A    | fumarylacetoacetate hydrolase domain containing 2A                                          |
| 163    | AP2B1     | adaptor-related protein complex 2, beta 1 subunit                                           |
| 115286 | SLC25A26  | solute carrier family 25, member 26                                                         |
| 390539 | OR4N3P    | olfactory receptor, family 4, subfamily N, member 3 pseudogene                              |
| 5445   | PON2      | paraoxonase 2                                                                               |
| 203427 | SLC25A43  | solute carrier family 25, member 43                                                         |
| 404770 | FAM75B    | family with sequence similarity 75, member B                                                |
| 6125   | RPL5      | ribosomal protein L5                                                                        |
| 352961 | HCG26     | HLA complex group 26 (non-protein coding)                                                   |
| 7386   | UQCRCF1   | ubiquinol-cytochrome c reductase, Rieske iron-sulfur polypeptide 1                          |
| 6640   | SNTA1     | syntrophin, alpha 1 (dystrophin-associated protein A1, 59kDa, acidic component)             |
| 388962 | BOLA3     | bolA homolog 3 (E. coli)                                                                    |
| 26060  | APPL1     | adaptor protein, phosphotyrosine interaction, PH domain and leucine zipper containing 1     |
| 293    | SLC25A6   | solute carrier family 25 (mitochondrial carrier; adenine nucleotide translocator), member 6 |
| 8883   | NAE1      | NEDD8 activating enzyme E1 subunit 1                                                        |
| 55082  | ARGLU1    | arginine and glutamate rich 1                                                               |
| 6154   | RPL26     | ribosomal protein L26                                                                       |
| 26996  | GPR160    | G protein-coupled receptor 160                                                              |
| 151313 | FAHD2B    | fumarylacetoacetate hydrolase domain containing 2B                                          |
| 788    | SLC25A20  | solute carrier family 25 (carnitine/acylcarnitine translocase), member 20                   |
| 10213  | PSMD14    | proteasome (prosome, macropain) 26S subunit, non-ATPase, 14                                 |
| 55552  | ZNF823    | zinc finger protein 823                                                                     |
| 57599  | WDR48     | WD repeat domain 48                                                                         |
| 81853  | TMEM14B   | transmembrane protein 14B                                                                   |
| 6647   | SOD1      | superoxide dismutase 1, soluble                                                             |
| 80212  | CCDC92    | coiled-coil domain containing 92                                                            |
| 5341   | PLEK      | pleckstrin                                                                                  |
| 79864  | C11orf63  | chromosome 11 open reading frame 63                                                         |
| 57711  | ZNF529    | zinc finger protein 529                                                                     |
| 280655 | C14orf19  | immunoglobulin (CD79A) binding protein 1 pseudogene                                         |
| 3703   | STT3A     | STT3, subunit of the oligosaccharyltransferase complex, homolog A (S. cerevisiae)           |
| 51503  | CWC15     | CWC15 spliceosome-associated protein homolog (S. cerevisiae)                                |
| 3108   | HLA-DMA   | major histocompatibility complex, class II, DM alpha                                        |
| 6232   | RPS27     | ribosomal protein S27                                                                       |
| 9117   | SEC22C    | SEC22 vesicle trafficking protein homolog C (S. cerevisiae)                                 |
| 23244  | PDS5A     | PDS5, regulator of cohesion maintenance, homolog A (S. cerevisiae)                          |
| 6133   | RPL9      | ribosomal protein L9                                                                        |
| 60436  | TGIF2     | TGFB-induced factor homeobox 2                                                              |
| 9744   | ACAP1     | ArfGAP with coiled-coil, ankyrin repeat and PH domains 1                                    |
| 80305  | TRABD     | TraB domain containing                                                                      |
| 2339   | FNTA      | farnesyltransferase, CAAX box, alpha                                                        |
| 81608  | FIP1L1    | FIP1 like 1 (S. cerevisiae)                                                                 |
| 51187  | RSL24D1   | ribosomal L24 domain containing 1                                                           |
| 5805   | PTS       | 6-pyruvoyltetrahydropterin synthase                                                         |
| 58505  | OSTC      | oligosaccharyltransferase complex subunit                                                   |
| 79443  | FYCO1     | FYVE and coiled-coil domain containing 1                                                    |
| 381    | ARF5      | ADP-ribosylation factor 5                                                                   |
| 286053 | NSMCE2    | non-SMC element 2, MMS21 homolog (S. cerevisiae)                                            |

#### CD141 lineage (downregulated genes)

| ENTREZ ID | Gene Symbol | Gene Name                                                                                |
|-----------|-------------|------------------------------------------------------------------------------------------|
| 121551    | BTBD11      | BTB (POZ) domain containing 11                                                           |
| 54453     | RIN2        | Ras and Rab interactor 2                                                                 |
| 114769    | CARD16      | caspase recruitment domain family, member 16                                             |
| 9046      | DOK2        | docking protein 2, 56kDa                                                                 |
| 837       | CASP4       | caspase 4, apoptosis-related cysteine peptidase                                          |
| 83719     | YPEL3       | yippee-like 3 (Drosophila)                                                               |
| 29992     | PILRA       | paired immunoglobulin-like type 2 receptor alpha                                         |
| 79168     | LILRA6      | leukocyte immunoglobulin-like receptor, subfamily A (with TM domain), member 6           |
| 2799      | GNS         | glucosamine (N-acetyl)-6-sulfatase                                                       |
| 80727     | TTYH3       | tweety homolog 3 (Drosophila)                                                            |
| 1436      | CSF1R       | colony stimulating factor 1 receptor                                                     |
| 11213     | IRAK3       | interleukin-1 receptor-associated kinase 3                                               |
| 219855    | SLC37A2     | solute carrier family 37 (glycerol-3-phosphate transporter), member 2                    |
| 1462      | VCAN        | versican                                                                                 |
| 834       | CASP1       | caspase 1, apoptosis-related cysteine peptidase (interleukin 1, beta, convertase)        |
| 51296     | SLC15A3     | solute carrier family 15, member 3                                                       |
| 341405    | ANKRD33     | ankyrin repeat domain 33                                                                 |
| 968       | CD68        | CD68 molecule                                                                            |
| 5265      | SERPINA1    | serpin peptidase inhibitor, clade A (alpha-1 antiproteinase, antitrypsin), member 1      |
| 64411     | ARAP3       | ArfGAP with RhoGAP domain, ankyrin repeat and PH domain 3                                |
| 7739      | ZNF185      | zinc finger protein 185 (LIM domain)                                                     |
| 11033     | ADAP1       | ArfGAP with dual PH domains 1                                                            |
| 27287     | VENTX       | VENT homeobox homolog (Xenopus laevis)                                                   |
| 11025     | LILRB3      | leukocyte immunoglobulin-like receptor, subfamily B (with TM and ITIM domains), member 3 |
| 79901     | CYBRD1      | cytochrome b reductase 1                                                                 |
| 5724      | PTAFR       | platelet-activating factor receptor                                                      |
| 10581     | IFITM2      | interferon induced transmembrane protein 2 (1-8D)                                        |
| 100049587 | SIGLEC14    | sialic acid binding Ig-like lectin 14                                                    |
| 10312     | TCIRG1      | T-cell, immune regulator 1, ATPase, H+ transporting, lysosomal V0 subunit A3             |
| 2633      | GBP1        | guanylate binding protein 1, interferon-inducible                                        |
| 3176      | HNMT        | histamine N-methyltransferase                                                            |
| 9404      | LPXN        | leupaxin                                                                                 |
| 79720     | VPS37B      | vacuolar protein sorting 37 homolog B (S. cerevisiae)                                    |
| 27239     | GPR162      | G protein-coupled receptor 162                                                           |
| 55365     | TMEM176A    | transmembrane protein 176A                                                               |
| 84293     | C10orf58    | chromosome 10 open reading frame 58                                                      |
| 1508      | CTSB        | cathepsin B                                                                              |

|           |              |                                                                                          |
|-----------|--------------|------------------------------------------------------------------------------------------|
| 137835    | TMEM71       | transmembrane protein 71                                                                 |
| 162989    | DEDD2        | death effector domain containing 2                                                       |
| 100129550 | LOC100129550 | hypothetical LOC100129550                                                                |
| 6453      | ITSN1        | intersectin 1 (SH3 domain protein)                                                       |
| 404636    | FAM45A       | family with sequence similarity 45, member A                                             |
| 116985    | ARAP1        | ArfGAP with RhoGAP domain, ankyrin repeat and PH domain 1                                |
| 9839      | ZEB2         | zinc finger E-box binding homeobox 2                                                     |
| 4043      | LRPAP1       | low density lipoprotein receptor-related protein associated protein 1                    |
| 8569      | MKNK1        | MAP kinase interacting serine/threonine kinase 1                                         |
| 3964      | LGALS8       | lectin, galactoside-binding, soluble, 8                                                  |
| 55763     | EXOC1        | exocyst complex component 1                                                              |
| 3916      | LAMP1        | lysosomal-associated membrane protein 1                                                  |
| 6252      | RTN1         | reticulon 1                                                                              |
| 929       | CD14         | CD14 molecule                                                                            |
| 10410     | IFITM3       | interferon induced transmembrane protein 3 (1-8U)                                        |
| 91351     | DDX60L       | DEAD (Asp-Glu-Ala-Asp) box polypeptide 60-like                                           |
| 7099      | TLR4         | toil-like receptor 4                                                                     |
| 54540     | FAM193B      | family with sequence similarity 193, member B                                            |
| 5476      | CTSA         | cathepsin A                                                                              |
| 10439     | OLFM1        | olfactomedin 1                                                                           |
| 4126      | MANBA        | mannosidase, beta A, lysosomal                                                           |
| 8564      | KMO          | kynurenine 3-monooxygenase (kynurenine 3-hydroxylase)                                    |
| 10924     | SMPDL3A      | sphingomyelin phosphodiesterase, acid-like 3A                                            |
| 5578      | PRKCA        | protein kinase C, alpha                                                                  |
| 84034     | EMILIN2      | elastin microfibril interfacier 2                                                        |
| 93589     | CACNA2D4     | calcium channel, voltage-dependent, alpha 2/delta subunit 4                              |
| 59        | ACTA2        | actin, alpha 2, smooth muscle, aorta                                                     |
| 57477     | SHROOM4      | shroom family member 4                                                                   |
| 3311      | HSPA7        | heat shock 70kDa protein 7 (HSP70B)                                                      |
| 113878    | DTX2         | deltex homolog 2 (Drosophila)                                                            |
| 1050      | CEBPA        | CCAAT/enhancer binding protein (C/EBP), alpha                                            |
| 4354      | MPP1         | membrane protein, palmitoylated 1, 55kDa                                                 |
| 2550      | GABBR1       | gamma-aminobutyric acid (GABA) B receptor, 1                                             |
| 115948    | CCDC151      | coiled-coil domain containing 151                                                        |
| 10288     | LILRB2       | leukocyte immunoglobulin-like receptor, subfamily B (with TM and ITIM domains), member 2 |
| 100506144 | LOC100506144 | hypothetical protein LOC100506144                                                        |
| 80267     | EDEM3        | ER degradation enhancer, mannosidase alpha-like 3                                        |
| 113675    | SDSL         | serine dehydratase-like                                                                  |
| 2537      | IFI6         | interferon, alpha-inducible protein 6                                                    |
| 3305      | HSPA1L       | heat shock 70kDa protein 1-like                                                          |
| 112770    | C1orf85      | chromosome 1 open reading frame 85                                                       |
| 7132      | TNFRSF1A     | tumor necrosis factor receptor superfamily, member 1A                                    |
| 64207     | IRF2BPL      | interferon regulatory factor 2 binding protein-like                                      |
| 51257     | MARCH2       | membrane-associated ring finger (C3HC4) 2                                                |
| 2634      | GBP2         | guanylate binding protein 2, interferon-inducible                                        |
| 1138      | CHRNA5       | cholinergic receptor, nicotinic, alpha 5                                                 |
| 10170     | DHRS9        | dehydrogenase/reductase (SDR family) member 9                                            |
| 6237      | RRAS         | related RAS viral (r-ras) oncogene homolog                                               |
| 5210      | PFKFB4       | 6-phosphofructo-2-kinase/fructose-2,6-biphosphatase 4                                    |
| 115825    | WDFY2        | WD repeat and FYVE domain containing 2                                                   |
| 55654     | TMEM127      | transmembrane protein 127                                                                |
| 57192     | MCOLN1       | mucopolipin 1                                                                            |
| 54458     | PRR13        | proline rich 13                                                                          |
| 27348     | TOR1B        | torsin family 1, member B (torsin B)                                                     |
| 80896     | NPL          | N-acetylneuraminatase pyruvate lyase (dihydrodipicolinate synthase)                      |
| 10673     | TNFSF13B     | tumor necrosis factor (ligand) superfamily, member 13b                                   |
| 200030    | NBPF11       | neuroblastoma breakpoint family, member 11                                               |
| 79042     | TSEN34       | tRNA splicing endonuclease 34 homolog (S. cerevisiae)                                    |
| 54861     | SNRK         | SNF related kinase                                                                       |
| 3784      | KCNQ1        | potassium voltage-gated channel, KQT-like subfamily, member 1                            |
| 79594     | MUL1         | mitochondrial E3 ubiquitin protein ligase 1                                              |
| 2131      | EXT1         | exostosin 1                                                                              |
| 126014    | OSCAR        | osteoclast associated, immunoglobulin-like receptor                                      |
| 9446      | GSTO1        | glutathione S-transferase omega 1                                                        |
| 55788     | LMBRD1       | LMBR1 domain containing 1                                                                |
| 65018     | PINK1        | PTEN induced putative kinase 1                                                           |
| 9354      | UBE4A        | ubiquitination factor E4A (UFD2 homolog, yeast)                                          |
| 79650     | C16orf57     | chromosome 16 open reading frame 57                                                      |
| 54965     | PIGX         | phosphatidylinositol glycan anchor biosynthesis, class X                                 |
| 10154     | PLXNC1       | plexin C1                                                                                |
| 57794     | SUGP1        | SURP and G patch domain containing 1                                                     |
| 353514    | LILRA5       | leukocyte immunoglobulin-like receptor, subfamily A (with TM domain), member 5           |
| 256586    | LYSMD2       | LysM, putative peptidoglycan-binding, domain containing 2                                |
| 55022     | PID1         | phosphotyrosine interaction domain containing 1                                          |
| 84689     | MS4A14       | membrane-spanning 4-domains, subfamily A, member 14                                      |
| 9466      | IL27RA       | interleukin 27 receptor, alpha                                                           |
| 25979     | DHRS7B       | dehydrogenase/reductase (SDR family) member 7B                                           |
| 58526     | MID1P1       | MID1 interacting protein 1 (gastrulation specific G12 homolog (zebrafish))               |
| 79065     | ATG9A        | ATG9 autophagy related 9 homolog A (S. cerevisiae)                                       |
| 9550      | ATP6V1G1     | ATPase, H+ transporting, lysosomal 13kDa, V1 subunit G1                                  |
| 8675      | STX16        | syntaxin 16                                                                              |
| 100132967 | NCRNA00204   | non-protein coding RNA 204                                                               |
| 55357     | TBC1D2       | TBC1 domain family, member 2                                                             |
| 146923    | RUNDC1       | RUN domain containing 1                                                                  |
| 8650      | NUMB         | numb homolog (Drosophila)                                                                |
| 84173     | ELMOD3       | ELMO/CED-12 domain containing 3                                                          |
| 26262     | TSPAN17      | tetraspanin 17                                                                           |
| 84193     | SETD3        | SET domain containing 3                                                                  |
| 718       | C3           | complement component 3                                                                   |
| 8451      | CUL4A        | cullin 4A                                                                                |
| 55760     | DHX32        | DEAH (Asp-Glu-Ala-His) box polypeptide 32                                                |
| 148867    | SLC30A7      | solute carrier family 30 (zinc transporter), member 7                                    |
| 10908     | PNPLA6       | patatin-like phospholipase domain containing 6                                           |
| 11018     | TMED1        | transmembrane emp24 protein transport domain containing 1                                |
| 8819      | SAP30        | Sin3A-associated protein, 30kDa                                                          |

|           |           |                                                                                     |
|-----------|-----------|-------------------------------------------------------------------------------------|
| 83464     | APH1B     | anterior pharynx defective 1 homolog B ( <i>C. elegans</i> )                        |
| 79132     | DHX58     | DEXH (Asp-Glu-X-His) box polypeptide 58                                             |
| 1051      | CEBPB     | CCAAT/enhancer binding protein (C/EBP), beta                                        |
| 6548      | SLC9A1    | solute carrier family 9 (sodium/hydrogen exchanger), member 1                       |
| 29097     | CNIH4     | cornichon homolog 4 ( <i>Drosophila</i> )                                           |
| 196383    | RILPL2    | Rab interacting lysosomal protein-like 2                                            |
| 57590     | WDFY1     | WD repeat and FYVE domain containing 1                                              |
| 3588      | IL10RB    | interleukin 10 receptor, beta                                                       |
| 144402    | CPNE8     | copine VIII                                                                         |
| 57674     | RNF213    | ring finger protein 213                                                             |
| 64429     | ZDHHC6    | zinc finger, DHHC-type containing 6                                                 |
| 51311     | TLR8      | toll-like receptor 8                                                                |
| 5286      | PIK3C2A   | phosphoinositide-3-kinase, class 2, alpha polypeptide                               |
| 6195      | RPS6KA1   | ribosomal protein S6 kinase, 90kDa, polypeptide 1                                   |
| 9826      | ARHGEF11  | Rho guanine nucleotide exchange factor (GEF) 11                                     |
| 203054    | ADCK5     | aarF domain containing kinase 5                                                     |
| 11182     | SLC2A6    | solute carrier family 2 (facilitated glucose transporter), member 6                 |
| 126003    | TRAPPC5   | trafficking protein particle complex 5                                              |
| 5394      | EXOSC10   | exosome component 10                                                                |
| 23294     | ANKS1A    | ankyrin repeat and sterile alpha motif domain containing 1A                         |
| 93594     | WDR67     | WD repeat domain 67                                                                 |
| 55344     | PLCXD1    | phosphatidylinositol-specific phospholipase C, X domain containing 1                |
| 55625     | ZDHHC7    | zinc finger, DHHC-type containing 7                                                 |
| 10870     | HCST      | hematopoietic cell signal transducer                                                |
| 103       | ADAR      | adenosine deaminase, RNA-specific                                                   |
| 666       | BOK       | BCL2-related ovarian killer                                                         |
| 5326      | PLAGL2    | pleiomorphic adenoma gene-like 2                                                    |
| 80325     | ABTB1     | ankyrin repeat and BTB (POZ) domain containing 1                                    |
| 96459     | FNIP1     | folliculin interacting protein 1                                                    |
| 90639     | COX19     | COX19 cytochrome c oxidase assembly homolog ( <i>S. cerevisiae</i> )                |
| 58475     | MSA47     | membrane-spanning 4-domains, subfamily A, member 7                                  |
| 145389    | SLC38A6   | solute carrier family 38, member 6                                                  |
| 100287171 | WASH1     | WAS protein family homolog 1                                                        |
| 6655      | SOS2      | son of sevenless homolog 2 ( <i>Drosophila</i> )                                    |
| 27128     | CYTH4     | cytohesin 4                                                                         |
| 6901      | TAZ       | tafazzin                                                                            |
| 9382      | COG1      | component of oligomeric golgi complex 1                                             |
| 55823     | VPS11     | vacuolar protein sorting 11 homolog ( <i>S. cerevisiae</i> )                        |
| 3454      | IFNAR1    | interferon (alpha, beta and omega) receptor 1                                       |
| 55505     | NOP10     | NOP10 ribonucleoprotein homolog (yeast)                                             |
| 1659      | DHX8      | DEAH (Asp-Glu-Ala-His) box polypeptide 8                                            |
| 84515     | MCM8      | minichromosome maintenance complex component 8                                      |
| 9960      | USP3      | ubiquitin specific peptidase 3                                                      |
| 6556      | SLC11A1   | solute carrier family 11 (proton-coupled divalent metal ion transporters), member 1 |
| 29116     | MYLIP     | myosin regulatory light chain interacting protein                                   |
| 3455      | IFNAR2    | interferon (alpha, beta and omega) receptor 2                                       |
| 57583     | TMEM181   | transmembrane protein 181                                                           |
| 442578    | STAG3L3   | stromal antigen 3-like 3                                                            |
| 54788     | DNAJB12   | DnaJ (Hsp40) homolog, subfamily B, member 12                                        |
| 53        | ACP2      | acid phosphatase 2, lysosomal                                                       |
| 80736     | SLC44A4   | solute carrier family 44, member 4                                                  |
| 9474      | ATG5      | ATG5 autophagy related 5 homolog ( <i>S. cerevisiae</i> )                           |
| 10092     | ARPC5     | actin related protein 2/3 complex, subunit 5, 16kDa                                 |
| 374882    | TMEM205   | transmembrane protein 205                                                           |
| 6621      | SNAPC4    | small nuclear RNA activating complex, polypeptide 4, 190kDa                         |
| 201294    | UNC13D    | unc-13 homolog D ( <i>C. elegans</i> )                                              |
| 5305      | PIP4K2A   | phosphatidylinositol-5-phosphate 4-kinase, type II, alpha                           |
| 138151    | NACC2     | NACC family member 2, BEN and BTB (POZ) domain containing                           |
| 54856     | GON4L     | gon-4-like ( <i>C. elegans</i> )                                                    |
| 8605      | PLA2G4C   | phospholipase A2, group IVC (cytosolic, calcium-independent)                        |
| 9673      | SLC25A44  | solute carrier family 25, member 44                                                 |
| 54834     | GDAP2     | ganglioside induced differentiation associated protein 2                            |
| 51023     | MRPS18C   | mitochondrial ribosomal protein S18C                                                |
| 943       | TNFRSF8   | tumor necrosis factor receptor superfamily, member 8                                |
| 9935      | MAFB      | v-maf musculoaponeurotic fibrosarcoma oncogene homolog B (avian)                    |
| 60684     | C4orf41   | chromosome 4 open reading frame 41                                                  |
| 2885      | GRB2      | growth factor receptor-bound protein 2                                              |
| 5606      | MAP2K3    | mitogen-activated protein kinase kinase 3                                           |
| 5297      | PI4KA     | phosphatidylinositol 4-kinase, catalytic, alpha                                     |
| 54507     | ADAMTSL4  | ADAMTS-like 4                                                                       |
| 2869      | GRK5      | G protein-coupled receptor kinase 5                                                 |
| 8705      | B3GALT4   | UDP-Gal:betaGlcNAc beta 1,3-galactosyltransferase, polypeptide 4                    |
| 4122      | MAN2A2    | mannosidase, alpha, class 2A, member 2                                              |
| 3241      | HPCAL1    | hippocalcin-like 1                                                                  |
| 8402      | SLC25A11  | solute carrier family 25 (mitochondrial carrier; oxoglutarate carrier), member 11   |
| 440836    | ODF3B     | outer dense fiber of sperm tails 3B                                                 |
| 51092     | SIDT2     | SID1 transmembrane family, member 2                                                 |
| 326       | AIRE      | autoimmune regulator                                                                |
| 1318      | SLC31A2   | solute carrier family 31 (copper transporters), member 2                            |
| 51168     | MYO15A    | myosin XVa                                                                          |
| 56034     | PDGFC     | platelet derived growth factor C                                                    |
| 201627    | FAM116A   | family with sequence similarity 116, member A                                       |
| 85450     | ITPRIP    | inositol 1,4,5-triphosphate receptor interacting protein                            |
| 6752      | SSTR2     | somatostatin receptor 2                                                             |
| 23247     | KIAA0556  | KIAA0556                                                                            |
| 83666     | PARP9     | poly (ADP-ribose) polymerase family, member 9                                       |
| 79602     | ADIPOR2   | adiponectin receptor 2                                                              |
| 81844     | TRIM56    | tripartite motif containing 56                                                      |
| 5184      | PEPD      | peptidase D                                                                         |
| 8519      | IFITM1    | interferon induced transmembrane protein 1 (9-27)                                   |
| 55858     | TMEM165   | transmembrane protein 165                                                           |
| 55051     | C14orf102 | chromosome 14 open reading frame 102                                                |
| 80256     | KIAA1539  | KIAA1539                                                                            |
| 10899     | JTB       | jumping translocation breakpoint                                                    |
| 374395    | TMEM179B  | transmembrane protein 179B                                                          |



|        |          |                                                                                                           |
|--------|----------|-----------------------------------------------------------------------------------------------------------|
| 6813   | STXBP2   | syntaxin binding protein 2                                                                                |
| 3783   | KCNN4    | potassium intermediate/small conductance calcium-activated channel, subfamily N, member 4                 |
| 8915   | BCL10    | B-cell CLL/lymphoma 10                                                                                    |
| 3732   | CD82     | CD82 molecule                                                                                             |
| 5351   | PLOD1    | procollagen-lysine 1, 2-oxoglutarate 5-dioxygenase 1                                                      |
| 64114  | TMBIM1   | transmembrane BAX inhibitor motif containing 1                                                            |
| 527    | ATP6V0C  | ATPase, H+ transporting, lysosomal 16kDa, V0 subunit c                                                    |
| 2733   | GLE1     | GLE1 RNA export mediator homolog (yeast)                                                                  |
| 30827  | CXXC1    | CXXC finger protein 1                                                                                     |
| 8893   | EIF2B5   | eukaryotic translation initiation factor 2B, subunit 5 epsilon, 82kDa                                     |
| 3098   | HK1      | hexokinase 1                                                                                              |
| 114785 | MBD6     | methyl-CpG binding domain protein 6                                                                       |
| 64759  | TNS3     | tensin 3                                                                                                  |
| 221662 | RBM24    | RNA binding motif protein 24                                                                              |
| 64077  | LHPP     | phospholysine phosphohistidine inorganic pyrophosphate phosphatase                                        |
| 55601  | DDX60    | DEAD (Asp-Glu-Ala-Asp) box polypeptide 60                                                                 |
| 10062  | NR1H3    | nuclear receptor subfamily 1, group H, member 3                                                           |
| 6390   | SDHB     | succinate dehydrogenase complex, subunit B, iron sulfur (lp)                                              |
| 152815 | THAP6    | THAP domain containing 6                                                                                  |
| 537    | ATP6AP1  | ATPase, H+ transporting, lysosomal accessory protein 1                                                    |
| 147798 | TMC4     | transmembrane channel-like 4                                                                              |
| 29919  | C18orf8  | chromosome 18 open reading frame 8                                                                        |
| 51765  | MST4     | serine/threonine protein kinase MST4                                                                      |
| 92595  | ZNF764   | zinc finger protein 764                                                                                   |
| 9821   | RB1CC1   | RB1-inducible coiled-coil 1                                                                               |
| 23208  | SYT11    | synaptotagmin XI                                                                                          |
| 51312  | SLC25A37 | solute carrier family 25, member 37                                                                       |
| 84957  | RELT     | RELT tumor necrosis factor receptor                                                                       |
| 114548 | NLRP3    | NLR family, pyrin domain containing 3                                                                     |
| 6051   | RNPEP    | arginyl aminopeptidase (aminopeptidase B)                                                                 |
| 84222  | TMEM191A | transmembrane protein 191A                                                                                |
| 118472 | ZNF511   | zinc finger protein 511                                                                                   |
| 220929 | ZNF438   | zinc finger protein 438                                                                                   |
| 87178  | PNPT1    | polyribonucleotide nucleotidyltransferase 1                                                               |
| 7009   | TMBIM6   | transmembrane BAX inhibitor motif containing 6                                                            |
| 6778   | STAT6    | signal transducer and activator of transcription 6, interleukin-4 induced                                 |
| 9990   | SLC12A6  | solute carrier family 12 (potassium/chloride transporters), member 6                                      |
| 23315  | SLC9A8   | solute carrier family 9 (sodium/hydrogen exchanger), member 8                                             |
| 5987   | TRIM27   | tripartite motif containing 27                                                                            |
| 994    | CDC25B   | cell division cycle 25 homolog B (S. pombe)                                                               |
| 113791 | PIK3IP1  | phosphoinositide-3-kinase interacting protein 1                                                           |
| 112616 | CMTM7    | CKLF-like MARVEL transmembrane domain containing 7                                                        |
| 22863  | ATG14    | ATG14 autophagy related 14 homolog (S. cerevisiae)                                                        |
| 26030  | PLEKHG3  | pleckstrin homology domain containing, family G (with RhoGef domain) member 3                             |
| 3074   | HEXB     | hexosaminidase B (beta polypeptide)                                                                       |
| 55008  | HERC6    | hect domain and RLD 6                                                                                     |
| 64784  | CRTC3    | CREB regulated transcription coactivator 3                                                                |
| 4277   | MICB     | MHC class I polypeptide-related sequence B                                                                |
| 54210  | TREM1    | triggering receptor expressed on myeloid cells 1                                                          |
| 2526   | FUT4     | fucosyltransferase 4 (alpha (1,3) fucosyltransferase, myeloid-specific)                                   |
| 93323  | HAUS8    | HAUS augmin-like complex, subunit 8                                                                       |
| 3920   | LAMP2    | lysosomal-associated membrane protein 2                                                                   |
| 441251 | SPDYE7P  | speedy homolog E7 (Xenopus laevis), pseudogene                                                            |
| 10068  | IL18BP   | interleukin 18 binding protein                                                                            |
| 57658  | CALCOCO1 | calcium binding and coiled-coil domain 1                                                                  |
| 55270  | NUDT15   | nudix (nucleoside diphosphate linked moiety X)-type motif 15                                              |
| 22861  | NLRP1    | NLR family, pyrin domain containing 1                                                                     |
| 5595   | MAPK3    | mitogen-activated protein kinase 3                                                                        |
| 6388   | SDF2     | stromal cell-derived factor 2                                                                             |
| 57532  | NUFIP2   | nuclear fragile X mental retardation protein interacting protein 2                                        |
| 23585  | TMEM50A  | transmembrane protein 50A                                                                                 |
| 54464  | XRN1     | 5'-3' exoribonuclease 1                                                                                   |
| 7226   | TRPM2    | transient receptor potential cation channel, subfamily M, member 2                                        |
| 55145  | THAP1    | THAP domain containing, apoptosis associated protein 1                                                    |
| 1982   | EIF4G2   | eukaryotic translation initiation factor 4 gamma, 2                                                       |
| 1486   | CTBS     | chitinase, di-N-acetyl-                                                                                   |
| 60682  | SMAP1    | small ArfGAP 1                                                                                            |
| 7728   | ZNF175   | zinc finger protein 175                                                                                   |
| 221322 | C6orf170 | chromosome 6 open reading frame 170                                                                       |
| 79137  | FAM134A  | family with sequence similarity 134, member A                                                             |
| 23608  | MKRN1    | makorin ring finger protein 1                                                                             |
| 9397   | NMT2     | N-myristoyltransferase 2                                                                                  |
| 23167  | EFR3A    | EFR3 homolog A (S. cerevisiae)                                                                            |
| 197335 | WDR90    | WD repeat domain 90                                                                                       |
| 116988 | AGAP3    | ArfGAP with GTPase domain, ankyrin repeat and PH domain 3                                                 |
| 6622   | SNCA     | synuclein, alpha (non A4 component of amyloid precursor)                                                  |
| 585    | BBS4     | Bardet-Biedl syndrome 4                                                                                   |
| 114826 | SMYD4    | SET and MYND domain containing 4                                                                          |
| 10307  | APBB3    | amyloid beta (A4) precursor protein-binding, family B, member 3                                           |
| 10634  | GAS2L1   | growth arrest-specific 2 like 1                                                                           |
| 8495   | PPFIBP2  | PTPRF interacting protein, binding protein 2 (liprin beta 2)                                              |
| 10589  | DRAP1    | DR1-associated protein 1 (negative cofactor 2 alpha)                                                      |
| 8497   | PPFIA4   | protein tyrosine phosphatase, receptor type, f polypeptide (PTPRF), interacting protein (liprin), alpha 4 |
| 221496 | LEMD2    | LEM domain containing 2                                                                                   |
| 197257 | LDHD     | lactate dehydrogenase D                                                                                   |
| 63922  | CTF18    | CTF18, chromosome transmission fidelity factor 18 homolog (S. cerevisiae)                                 |
| 65010  | SLC26A6  | solute carrier family 26, member 6                                                                        |
| 255919 | TMEM188  | transmembrane protein 188                                                                                 |
| 399761 | BMS1P5   | BMS1 pseudogene 5                                                                                         |
| 8714   | ABCC3    | ATP-binding cassette, sub-family C (CFTR/MRP), member 3                                                   |
| 643418 | LIPN     | lipase, family member N                                                                                   |
| 91543  | RSAD2    | radical S-adenosyl methionine domain containing 2                                                         |
| 63929  | XPNPEP3  | X-prolyl aminopeptidase (aminopeptidase P) 3, putative                                                    |
| 5222   | PGA5     | pepsinogen 5, group I (pepsinogen A)                                                                      |
| 56181  | FAM54B   | family with sequence similarity 54, member B                                                              |

|           |              |                                                                               |
|-----------|--------------|-------------------------------------------------------------------------------|
| 7248      | TSC1         | tuberous sclerosis 1                                                          |
| 6617      | SNAPC1       | small nuclear RNA activating complex, polypeptide 1, 43kDa                    |
| 492311    | C5orf53      | chromosome 5 open reading frame 53                                            |
| 2629      | GBA          | glucosidase, beta, acid                                                       |
| 284422    | C19orf77     | chromosome 19 open reading frame 77                                           |
| 54622     | ARL15        | ADP-ribosylation factor-like 15                                               |
| 84892     | C3orf39      | chromosome 3 open reading frame 39                                            |
| 55238     | SLC38A7      | solute carrier family 38, member 7                                            |
| 1030      | CDKN2B       | cyclin-dependent kinase inhibitor 2B (p15, inhibits CDK4)                     |
| 9592      | IER2         | immediate early response 2                                                    |
| 148932    | MOBK12C      | MOB1, Mps One Binder kinase activator-like 2C (yeast)                         |
| 80129     | C6orf97      | chromosome 6 open reading frame 97                                            |
| 151636    | DTX3L        | deltex 3-like (Drosophila)                                                    |
| 747       | DAGLA        | diacylglycerol lipase, alpha                                                  |
| 5621      | PRNP         | prion protein                                                                 |
| 55603     | FAM46A       | family with sequence similarity 46, member A                                  |
| 401082    | FLJ25363     | hypothetical LOC401082                                                        |
| 64072     | CDH23        | cadherin-related 23                                                           |
| 79847     | TMEM180      | transmembrane protein 180                                                     |
| 134510    | UBLCP1       | ubiquitin-like domain containing CTD phosphatase 1                            |
| 51305     | KCNK9        | potassium channel, subfamily K, member 9                                      |
| 375061    | FAM89A       | family with sequence similarity 89, member A                                  |
| 56257     | MEPCE        | methylphosphate capping enzyme                                                |
| 64764     | CREB3L2      | cAMP responsive element binding protein 3-like 2                              |
| 84572     | GNPTG        | N-acetylglucosamine-1-phosphate transferase, gamma subunit                    |
| 4744      | NEFH         | neurofilament, heavy polypeptide                                              |
| 51280     | GOLM1        | golgi membrane protein 1                                                      |
| 79992     | NCRNA00241   | non-protein coding RNA 241                                                    |
| 8455      | ATRN         | attractin                                                                     |
| 197259    | MLKL         | mixed lineage kinase domain-like                                              |
| 8685      | MARCO        | macrophage receptor with collagenous structure                                |
| 22821     | RASA3        | RAS p21 protein activator 3                                                   |
| 9129      | PRPF3        | PRP3 pre-mRNA processing factor 3 homolog (S. cerevisiae)                     |
| 51714     | SELT         | selenoprotein T                                                               |
| 388       | RHOB         | ras homolog gene family, member B                                             |
| 28959     | TMEM176B     | transmembrane protein 176B                                                    |
| 7408      | VASP         | vasodilator-stimulated phosphoprotein                                         |
| 838       | CASP5        | caspace 5, apoptosis-related cysteine peptidase                               |
| 100131607 | LOC100131607 | hypothetical LOC100131607                                                     |
| 8843      | GPR109B      | G protein-coupled receptor 109B                                               |
| 285533    | RNF175       | ring finger protein 175                                                       |
| 57719     | ANO8         | anoctamin 8                                                                   |
| 8638      | OASL         | 2'-5'-oligoadenylate synthetase-like                                          |
| 719       | C3AR1        | complement component 3a receptor 1                                            |
| 23523     | CABIN1       | calcineurin binding protein 1                                                 |
| 9853      | RUSC2        | RUN and SH3 domain containing 2                                               |
| 474338    | SUMO1P3      | SUMO1 pseudogene 3                                                            |
| 5908      | RAP1B        | RAP1B, member of RAS oncogene family                                          |
| 1513      | CTSK         | cathepsin K                                                                   |
| 3382      | ICA1         | islet cell autoantigen 1, 69kDa                                               |
| 83931     | STK40        | serine/threonine kinase 40                                                    |
| 28966     | SNX24        | sorting nexin 24                                                              |
| 360132    | FKBP9L       | FK506 binding protein 9-like                                                  |
| 22919     | MAPRE1       | microtubule-associated protein, RP/EB family, member 1                        |
| 6583      | SLC22A4      | solute carrier family 22 (organic cation/ergothioneine transporter), member 4 |
| 6398      | SECTM1       | secreted and transmembrane 1                                                  |
| 641649    | TMEM91       | transmembrane protein 91                                                      |
| 23405     | DICER1       | dicer 1, ribonuclease type III                                                |
| 5768      | QSOX1        | quiescin Q6 sulfhydryl oxidase 1                                              |
| 55723     | ASF1B        | ASF1 anti-silencing function 1 homolog B (S. cerevisiae)                      |
| 51538     | ZCCHC17      | zinc finger, CCHC domain containing 17                                        |
| 85403     | EAF1         | ELL associated factor 1                                                       |
| 79888     | LPCAT1       | lysophosphatidylcholine acyltransferase 1                                     |
| 84498     | FAM120B      | family with sequence similarity 120B                                          |
| 84446     | BRSK1        | BR serine/threonine kinase 1                                                  |
| 221786    | FAM200A      | family with sequence similarity 200, member A                                 |
| 7936      | RDBP         | RD RNA binding protein                                                        |
| 1509      | CTSD         | cathepsin D                                                                   |
| 10435     | CDC42EP2     | CDC42 effector protein (Rho GTPase binding) 2                                 |
| 60412     | EXOC4        | exocyst complex component 4                                                   |
| 54149     | C21orf91     | chromosome 21 open reading frame 91                                           |
| 5140      | PDE3B        | phosphodiesterase 3B, cGMP-inhibited                                          |
| 199675    | C19orf59     | chromosome 19 open reading frame 59                                           |
| 150365    | MEI1         | meiosis inhibitor 1                                                           |
| 7060      | THBS4        | thrombospondin 4                                                              |
| 116372    | LYPD1        | LY6/PLAUR domain containing 1                                                 |
| 1958      | EGR1         | early growth response 1                                                       |
| 5914      | RARA         | retinoic acid receptor, alpha                                                 |
| 53834     | FGFRL1       | fibroblast growth factor receptor-like 1                                      |
| 9296      | ATP6V1F      | ATPase, H+ transporting, lysosomal 14kDa, V1 subunit F                        |
| 284       | ANGPT1       | angiopoietin 1                                                                |
| 7732      | RNF112       | ring finger protein 112                                                       |
| 25946     | ZNF385A      | zinc finger protein 385A                                                      |
| 5708      | PSMD2        | proteasome (prosome, macropain) 26S subunit, non-ATPase, 2                    |
| 9890      | LPPR4        | lipid phosphate phosphatase-related protein type 4                            |
| 165530    | CLEC4F       | C-type lectin domain family 4, member F                                       |
| 25903     | OLFML2B      | olfactomedin-like 2B                                                          |
| 944       | TNFSF8       | tumor necrosis factor (ligand) superfamily, member 8                          |
| 5873      | RAB27A       | RAB27A, member RAS oncogene family                                            |
| 149018    | LELP1        | late cornified envelope-like proline-rich 1                                   |
| 116842    | LEAP2        | liver expressed antimicrobial peptide 2                                       |
| 4094      | MAF          | v-maf musculoaponeurotic fibrosarcoma oncogene homolog (avian)                |
| 57827     | C6orf47      | chromosome 6 open reading frame 47                                            |
| 123       | PLIN2        | perilipin 2                                                                   |
| 27202     | GPR77        | G protein-coupled receptor 77                                                 |

|           |              |                                                                                              |
|-----------|--------------|----------------------------------------------------------------------------------------------|
| 2162      | F13A1        | coagulation factor XIII, A1 polypeptide                                                      |
| 83478     | ARHGAP24     | Rho GTPase activating protein 24                                                             |
| 717       | C2           | complement component 2                                                                       |
| 80139     | ZNF703       | zinc finger protein 703                                                                      |
| 84179     | MFSD7        | major facilitator superfamily domain containing 7                                            |
| 1066      | CES1         | carboxylesterase 1                                                                           |
| 5783      | PTPN13       | protein tyrosine phosphatase, non-receptor type 13 (APO-1/CD95 (Fas)-associated phosphatase) |
| 286333    | NCRNA00256A  | non-protein coding RNA 256A                                                                  |
| 2350      | FOLR2        | folate receptor 2 (fetal)                                                                    |
| 2213      | FCGR2B       | Fc fragment of IgG, low affinity IIb, receptor (CD32)                                        |
| 9034      | CCRL2        | chemokine (C-C motif) receptor-like 2                                                        |
| 23474     | ETHE1        | ethylmalonic encephalopathy 1                                                                |
| 90362     | FAM110B      | family with sequence similarity 110, member B                                                |
| 5585      | PKN1         | protein kinase N1                                                                            |
| 285550    | FAM200B      | family with sequence similarity 200, member B                                                |
| 3753      | KCNE1        | potassium voltage-gated channel, Isk-related family, member 1                                |
| 54463     | FAM134B      | family with sequence similarity 134, member B                                                |
| 79852     | EPHX3        | epoxide hydrolase 3                                                                          |
| 79842     | ZBTB3        | zinc finger and BTB domain containing 3                                                      |
| 6840      | SVIL         | supervillin                                                                                  |
| 5806      | PTX3         | pentraxin 3, long                                                                            |
| 116443    | GRIN3A       | glutamate receptor, ionotropic, N-methyl-D-aspartate 3A                                      |
| 23328     | SASH1        | SAM and SH3 domain containing 1                                                              |
| 7464      | CORO2A       | coronin, actin binding protein, 2A                                                           |
| 83787     | ARMC10       | armadillo repeat containing 10                                                               |
| 65124     | ANKRD57      | ankyrin repeat domain 57                                                                     |
| 122402    | TDRD9        | tudor domain containing 9                                                                    |
| 100132417 | FCGR1C       | Fc fragment of IgG, high affinity I, receptor (CD64)                                         |
| 4481      | MSR1         | macrophage scavenger receptor 1                                                              |
| 339390    | CLEC4G       | C-type lectin domain family 4, member G                                                      |
| 23639     | LRRC6        | leucine rich repeat containing 6                                                             |
| 7106      | TSPAN4       | tetraspanin 4                                                                                |
| 53826     | FXYD6        | FXYD domain containing ion transport regulator 6                                             |
| 657       | BMPR1A       | bone morphogenetic protein receptor, type IA                                                 |
| 1762      | DMWD         | dystrophia myotonica, WD repeat containing                                                   |
| 10462     | CLEC10A      | C-type lectin domain family 10, member A                                                     |
| 89958     | C9orf140     | chromosome 9 open reading frame 140                                                          |
| 222962    | SLC29A4      | solute carrier family 29 (nucleoside transporters), member 4                                 |
| 2857      | GPR34        | G protein-coupled receptor 34                                                                |
| 9332      | CD163        | CD163 molecule                                                                               |
| 10544     | PROCR        | protein C receptor, endothelial                                                              |
| 117144    | CATSPER1     | cation channel, sperm associated 1                                                           |
| 712       | C1QA         | complement component 1, q subcomponent, A chain                                              |
| 9454      | HOMER3       | homer homolog 3 (Drosophila)                                                                 |
| 23166     | STAB1        | stabilin 1                                                                                   |
| 326342    | EMR4P        | egf-like module containing, mucin-like, hormone receptor-like 4 pseudogene                   |
| 55615     | PRR5         | proline rich 5 (renal)                                                                       |
| 84668     | FAM126A      | family with sequence similarity 126, member A                                                |
| 10855     | HPSE         | heparanase                                                                                   |
| 1959      | EGR2         | early growth response 2                                                                      |
| 4023      | LPL          | lipoprotein lipase                                                                           |
| 4923      | NTSR1        | neurotensin receptor 1 (high affinity)                                                       |
| 151011    | SEPT10       | septin 10                                                                                    |
| 165140    | OXER1        | oxoeicosanoid (OXE) receptor 1                                                               |
| 11326     | VSIG4        | V-set and immunoglobulin domain containing 4                                                 |
| 10461     | MERTK        | c-mer proto-oncogene tyrosine kinase                                                         |
| 79605     | PGBD5        | piggyBac transposable element derived 5                                                      |
| 913       | CD1E         | CD1e molecule                                                                                |
| 4640      | MYO1A        | myosin IA                                                                                    |
| 910       | CD1B         | CD1b molecule                                                                                |
| 1955      | MEGF9        | multiple EGF-like-domains 9                                                                  |
| 2048      | EPHB2        | EPH receptor B2                                                                              |
| 3240      | HP           | haptoglobin                                                                                  |
| 5337      | PLD1         | phospholipase D1, phosphatidylcholine-specific                                               |
| 653509    | SFTPA1       | surfactant protein A1                                                                        |
| 57010     | CABP4        | calcium binding protein 4                                                                    |
| 100128059 | LOC100128059 | hypothetical LOC100128059                                                                    |
| 653567    | FAM23A       | family with sequence similarity 23, member A                                                 |
| 125206    | SLC5A10      | solute carrier family 5 (sodium/glucose cotransporter), member 10                            |
| 10570     | DPYSL4       | dihydropyrimidinase-like 4                                                                   |
| 30835     | CD209        | CD209 molecule                                                                               |
| 51760     | SYT17        | synaptotagmin XVII                                                                           |
| 79971     | WLS          | wntless homolog (Drosophila)                                                                 |
| 1593      | CYP27A1      | cytochrome P450, family 27, subfamily A, polypeptide 1                                       |
| 10911     | UTS2         | urotensin 2                                                                                  |
| 56300     | IL1F9        | interleukin 1 family, member 9                                                               |
| 5360      | PLTP         | phospholipid transfer protein                                                                |
| 118932    | ANKRD22      | ankyrin repeat domain 22                                                                     |
| 6355      | CCL8         | chemokine (C-C motif) ligand 8                                                               |
| 283316    | CD163L1      | CD163 molecule-like 1                                                                        |

#### CD1c lineage (upregulated genes)

| ENTREZ ID | Gene Symbol | Gene Name                                                            |
|-----------|-------------|----------------------------------------------------------------------|
| 913       | CD1E        | CD1e molecule                                                        |
| 2205      | FCER1A      | Fc fragment of IgE, high affinity I, receptor for; alpha polypeptide |
| 129293    | C2orf89     | chromosome 2 open reading frame 89                                   |
| 1235      | CCR6        | chemokine (C-C motif) receptor 6                                     |
| 911       | CD1C        | CD1c molecule                                                        |
| 64798     | DEPTOR      | DEP domain containing MTOR-interacting protein                       |
| 54733     | SLC35F2     | solute carrier family 35, member F2                                  |
| 5475      | PPEF1       | protein phosphatase, EF-hand calcium binding domain 1                |
| 130589    | GALM        | galactose mutarotase (aldose 1-epimerase)                            |
| 1298      | COL9A2      | collagen, type IX, alpha 2                                           |
| 28951     | TRIB2       | tribbles homolog 2 (Drosophila)                                      |
| 910       | CD1B        | CD1b molecule                                                        |

|        |         |                                                                        |
|--------|---------|------------------------------------------------------------------------|
| 3516   | RBPJ    | recombination signal binding protein for immunoglobulin kappa J region |
| 914    | CD2     | CD2 molecule                                                           |
| 143941 | TTC36   | tetratricopeptide repeat domain 36                                     |
| 60468  | BACH2   | BTB and CNC homology 1, basic leucine zipper transcription factor 2    |
| 9185   | REPS2   | RALBP1 associated Eps domain containing 2                              |
| 81539  | SLC38A1 | solute carrier family 38, member 1                                     |
| 3111   | HLA-DOA | major histocompatibility complex, class II, DO alpha                   |
| 909    | CD1A    | CD1a molecule                                                          |
| 5993   | RFX5    | regulatory factor X, 5 (influences HLA class II expression)            |
| 3581   | IL9R    | interleukin 9 receptor                                                 |
| 26996  | GPR160  | G protein-coupled receptor 160                                         |
| 9133   | CCNB2   | cyclin B2                                                              |
| 55665  | URGCP   | upregulator of cell proliferation                                      |
| 201134 | CCDC46  | coiled-coil domain containing 46                                       |
| 10090  | UST     | uronyl-2-sulfotransferase                                              |
| 2535   | FZD2    | frizzled homolog 2 (Drosophila)                                        |
| 921    | CD5     | CD5 molecule                                                           |
| 3784   | KCNQ1   | potassium voltage-gated channel, KQT-like subfamily, member 1          |
| 1107   | CHD3    | chromodomain helicase DNA binding protein 3                            |
| 5578   | PRKCA   | protein kinase C, alpha                                                |
| 8841   | HDAC3   | histone deacetylase 3                                                  |
| 51611  | DPH5    | DPH5 homolog (S. cerevisiae)                                           |
| 85440  | DOCK7   | dedicator of cytokinesis 7                                             |
| 2322   | FLT3    | fms-related tyrosine kinase 3                                          |
| 6209   | RPS15   | ribosomal protein S15                                                  |
| 2675   | GFRA2   | GDNF family receptor alpha 2                                           |
| 56271  | BEX4    | brain expressed, X-linked 4                                            |
| 9744   | ACAP1   | ArfGAP with coiled-coil, ankyrin repeat and PH domains 1               |
| 113675 | SDSL    | serine dehydratase-like                                                |
| 85012  | TCEAL3  | transcription elongation factor A (SII)-like 3                         |
| 493    | ATP2B4  | ATPase, Ca <sup>++</sup> transporting, plasma membrane 4               |
| 5009   | OTC     | ornithine carbamoyltransferase                                         |
| 5445   | PON2    | paraoxonase 2                                                          |
| 860    | RUNX2   | runt-related transcription factor 2                                    |
| 9404   | LPXN    | leupaxin                                                               |
| 80221  | ACSF2   | acyl-CoA synthetase family member 2                                    |
| 2037   | EPB41L2 | erythrocyte membrane protein band 4.1-like 2                           |
| 23231  | SEL1L3  | sel-1 suppressor of lin-12-like 3 (C. elegans)                         |
| 64077  | LHPP    | phospholysine phosphohistidine inorganic pyrophosphate phosphatase     |
| 339344 | MYPOP   | Myb-related transcription factor, partner of profilin                  |
| 30011  | SH3KBP1 | SH3-domain kinase binding protein 1                                    |
| 2665   | GD12    | GDP dissociation inhibitor 2                                           |
| 6621   | SNAPC4  | small nuclear RNA activating complex, polypeptide 4, 190kDa            |
| 7263   | TST     | thiosulfate sulfurtransferase (rhodanese)                              |
| 51522  | TMEM14C | transmembrane protein 14C                                              |
| 6252   | RTN1    | reticulon 1                                                            |
| 5305   | PIP4K2A | phosphatidylinositol-5-phosphate 4-kinase, type II, alpha              |
| 80347  | COASY   | CoA synthase                                                           |
| 5296   | PIK3R2  | phosphoinositide-3-kinase, regulatory subunit 2 (beta)                 |

#### CD1c lineage (downregulated genes)

| ENTREZ ID | Gene Symbol | Gene Name                                                           |
|-----------|-------------|---------------------------------------------------------------------|
| 5732      | PTGER2      | prostaglandin E receptor 2 (subtype EP2), 53kDa                     |
| 341405    | ANKRD33     | ankyrin repeat domain 33                                            |
| 968       | CD68        | CD68 molecule                                                       |
| 29948     | OSGIN1      | oxidative stress induced growth inhibitor 1                         |
| 79443     | FYCO1       | FYVE and coiled-coil domain containing 1                            |
| 2030      | SLC29A1     | solute carrier family 29 (nucleoside transporters), member 1        |
| 25798     | BRI3        | brain protein I3                                                    |
| 220929    | ZNF438      | zinc finger protein 438                                             |
| 23303     | KIF13B      | kinesin family member 13B                                           |
| 145389    | SLC38A6     | solute carrier family 38, member 6                                  |
| 57616     | TSHZ3       | teashirt zinc finger homeobox 3                                     |
| 10924     | SMPDL3A     | sphingomyelin phosphodiesterase, acid-like 3A                       |
| 80896     | NPL         | N-acetylneuraminatase pyruvate lyase (dihydrodipicolinate synthase) |
| 171586    | ABHD3       | abhydrolase domain containing 3                                     |
| 3759      | KCNJ2       | potassium inwardly-rectifying channel, subfamily J, member 2        |
| 8459      | TPST2       | tyrosylprotein sulfotransferase 2                                   |
| 5341      | PLEK        | pleckstrin                                                          |
| 56851     | C15orf24    | chromosome 15 open reading frame 24                                 |
| 112770    | C1orf85     | chromosome 1 open reading frame 85                                  |
| 27348     | TOR1B       | torsin family 1, member B (torsin B)                                |
| 11319     | ECD         | ecdysoneless homolog (Drosophila)                                   |
| 2317      | FLNB        | filamin B, beta                                                     |
| 57192     | MCOLN1      | mucoilin 1                                                          |
| 161742    | SPRED1      | sprouty-related, EVH1 domain containing 1                           |
| 666       | BOK         | BCL2-related ovarian killer                                         |
| 7099      | TLR4        | toll-like receptor 4                                                |
| 55829     | SELS        | selenoprotein S                                                     |
| 29115     | SAP30BP     | SAP30 binding protein                                               |
| 55357     | TBC1D2      | TBC1 domain family, member 2                                        |
| 23111     | SPG20       | spastic paraplegia 20 (Troyer syndrome)                             |
| 152687    | ZNF595      | zinc finger protein 595                                             |
| 9871      | SEC24D      | SEC24 family, member D (S. cerevisiae)                              |
| 25832     | NBPF14      | neuroblastoma breakpoint family, member 14                          |
| 5222      | PGA5        | pepsinogen 5, group I (pepsinogen A)                                |
| 5660      | PSAP        | prosaposin                                                          |
| 23590     | PDSS1       | prenyl (decaprenyl) diphosphate synthase, subunit 1                 |
| 8674      | VAMP4       | vesicle-associated membrane protein 4                               |
| 50651     | SLC45A1     | solute carrier family 45, member 1                                  |
| 64795     | RMND5A      | required for meiotic nuclear division 5 homolog A (S. cerevisiae)   |
| 57106     | NAT14       | N-acetyltransferase 14 (GCN5-related, putative)                     |
| 91012     | LASS5       | LAG1 homolog, ceramide synthase 5                                   |
| 51280     | GOLM1       | golgi membrane protein 1                                            |
| 83693     | HSDL1       | hydroxysteroid dehydrogenase like 1                                 |

|        |          |                                                                                                |
|--------|----------|------------------------------------------------------------------------------------------------|
| 4883   | NPR3     | natriuretic peptide receptor C/guanylate cyclase C (atrionatriuretic peptide receptor C)       |
| 11156  | PTP4A3   | protein tyrosine phosphatase type IVA, member 3                                                |
| 8869   | ST3GAL5  | ST3 beta-galactoside alpha-2,3-sialyltransferase 5                                             |
| 2766   | GMPR     | guanosine monophosphate reductase                                                              |
| 9601   | PDIA4    | protein disulfide isomerase family A, member 4                                                 |
| 224    | ALDH3A2  | aldehyde dehydrogenase 3 family, member A2                                                     |
| 9554   | SEC22B   | SEC22 vesicle trafficking protein homolog B (S. cerevisiae) (gene/pseudogene)                  |
| 9935   | MAFB     | v-maf musculoaponeurotic fibrosarcoma oncogene homolog B (avian)                               |
| 51714  | SELT     | selenoprotein T                                                                                |
| 113791 | PIK3IP1  | phosphoinositide-3-kinase interacting protein 1                                                |
| 55711  | FAR2     | fatty acyl CoA reductase 2                                                                     |
| 2931   | GSK3A    | glycogen synthase kinase 3 alpha                                                               |
| 643418 | LIPN     | lipase, family member N                                                                        |
| 26873  | OPLAH    | 5-oxoprolinase (ATP-hydrolysing)                                                               |
| 6556   | SLC11A1  | solute carrier family 11 (proton-coupled divalent metal ion transporters), member 1            |
| 57486  | NLN      | neurolysin (metallopeptidase M3 family)                                                        |
| 1509   | CTSD     | cathepsin D                                                                                    |
| 3688   | ITGB1    | integrin, beta 1 (fibronectin receptor, beta polypeptide, antigen CD29 includes MDF2, MSK12)   |
| 55723  | ASF1B    | ASF1 anti-silencing function 1 homolog B (S. cerevisiae)                                       |
| 27202  | GPR77    | G protein-coupled receptor 77                                                                  |
| 28966  | SNX24    | sorting nexin 24                                                                               |
| 4651   | MYO10    | myosin X                                                                                       |
| 28959  | TMEM176B | transmembrane protein 176B                                                                     |
| 9853   | RUSC2    | RUN and SH3 domain containing 2                                                                |
| 710    | SERPING1 | serpin peptidase inhibitor, clade G (C1 inhibitor), member 1                                   |
| 84446  | BRSK1    | BR serine/threonine kinase 1                                                                   |
| 8269   | TMEM187  | transmembrane protein 187                                                                      |
| 57507  | ZNF608   | zinc finger protein 608                                                                        |
| 7704   | ZBTB16   | zinc finger and BTB domain containing 16                                                       |
| 10184  | LHFPL2   | lipoma HMGIC fusion partner-like 2                                                             |
| 80139  | ZNF703   | zinc finger protein 703                                                                        |
| 148741 | ANKRD35  | ankyrin repeat domain 35                                                                       |
| 23328  | SASH1    | SAM and SH3 domain containing 1                                                                |
| 5335   | PLCG1    | phospholipase C, gamma 1                                                                       |
| 151011 | SEPT10   | septin 10                                                                                      |
| 2048   | EPHB2    | EPH receptor B2                                                                                |
| 90362  | FAM110B  | family with sequence similarity 110, member B                                                  |
| 717    | C2       | complement component 2                                                                         |
| 80183  | C13orf18 | chromosome 13 open reading frame 18                                                            |
| 10461  | MERTK    | c-mer proto-oncogene tyrosine kinase                                                           |
| 25903  | OLFML2B  | olfactomedin-like 2B                                                                           |
| 65124  | ANKRD57  | ankyrin repeat domain 57                                                                       |
| 5064   | PALM     | paralemmin                                                                                     |
| 1906   | EDN1     | endothelin 1                                                                                   |
| 10855  | HPSE     | heparanase                                                                                     |
| 719    | C3AR1    | complement component 3a receptor 1                                                             |
| 79412  | KREMEN2  | kringle containing transmembrane protein 2                                                     |
| 5368   | PNOG     | prepronociceptin                                                                               |
| 3904   | LAIR2    | leukocyte-associated immunoglobulin-like receptor 2                                            |
| 79605  | PGBD5    | piggyBac transposable element derived 5                                                        |
| 1501   | CTNND2   | catenin (cadherin-associated protein), delta 2 (neural plakophilin-related arm-repeat protein) |
| 160335 | TMT2C    | transmembrane and tetraicopeptide repeat containing 2                                          |
| 5159   | PDGFRB   | platelet-derived growth factor receptor, beta polypeptide                                      |
| 9454   | HOMER3   | homer homolog 3 (Drosophila)                                                                   |
| 1903   | S1PR3    | sphingosine-1-phosphate receptor 3                                                             |
| 147495 | APCDD1   | adenomatosis polyposis coli down-regulated 1                                                   |
| 55384  | MEG3     | maternally expressed 3 (non-protein coding)                                                    |
| 440712 | C1orf186 | chromosome 1 open reading frame 186                                                            |
| 83716  | CRISPLD2 | cysteine-rich secretory protein LCCL domain containing 2                                       |
| 5167   | ENPP1    | ectonucleotide pyrophosphatase/phosphodiesterase 1                                             |
| 7450   | VWF      | von Willebrand factor                                                                          |
| 1803   | DPP4     | dipeptidyl-peptidase 4                                                                         |
| 5337   | PLD1     | phospholipase D1, phosphatidylcholine-specific                                                 |
| 5730   | PTGDS    | prostaglandin D2 synthase 21kDa (brain)                                                        |
| 116159 | CYYR1    | cysteine/tyrosine-rich 1                                                                       |

#### CD14+ skin DC (upregulated genes)

| ENTREZ ID | Gene Symbol | Gene Name                                                          |
|-----------|-------------|--------------------------------------------------------------------|
| 9446      | GSTO1       | glutathione S-transferase omega 1                                  |
| 30835     | CD209       | CD209 molecule                                                     |
| 10062     | NR1H3       | nuclear receptor subfamily 1, group H, member 3                    |
| 585       | BBS4        | Bardet-Biedl syndrome 4                                            |
| 7226      | TRPM2       | transient receptor potential cation channel, subfamily M, member 2 |
| 65010     | SLC26A6     | solute carrier family 26, member 6                                 |
| 57583     | TMEM181     | transmembrane protein 181                                          |
| 24149     | ZNF318      | zinc finger protein 318                                            |
| 10184     | LHFPL2      | lipoma HMGIC fusion partner-like 2                                 |
| 145389    | SLC38A6     | solute carrier family 38, member 6                                 |
| 25903     | OLFML2B     | olfactomedin-like 2B                                               |
| 80765     | STARD5      | StAR-related lipid transfer (START) domain containing 5            |
| 65124     | ANKRD57     | ankyrin repeat domain 57                                           |
| 123       | PLIN2       | perilipin 2                                                        |
| 53831     | GPR84       | G protein-coupled receptor 84                                      |
| 4860      | PNP         | purine nucleoside phosphorylase                                    |
| 63875     | MRPL17      | mitochondrial ribosomal protein L17                                |
| 537       | ATP6AP1     | ATPase, H+ transporting, lysosomal accessory protein 1             |
| 401321    | LOC401321   | hypothetical LOC401321                                             |
| 9296      | ATP6V1F     | ATPase, H+ transporting, lysosomal 14kDa, V1 subunit F             |
| 7106      | TSPAN4      | tetraspanin 4                                                      |
| 23646     | PLD3        | phospholipase D family, member 3                                   |
| 57669     | EPB41L5     | erythrocyte membrane protein band 4.1 like 5                       |
| 161742    | SPRED1      | sprouty-related, EVH1 domain containing 1                          |
| 116985    | ARAP1       | ArfGAP with RhoGAP domain, ankyrin repeat and PH domain 1          |
| 5768      | QSOX1       | quiescin Q6 sulfhydryl oxidase 1                                   |

|        |           |                                                                                                                  |
|--------|-----------|------------------------------------------------------------------------------------------------------------------|
| 10307  | APBB3     | amyloid beta (A4) precursor protein-binding, family B, member 3                                                  |
| 492311 | C5orf53   | chromosome 5 open reading frame 53                                                                               |
| 84879  | MFSD2A    | major facilitator superfamily domain containing 2A                                                               |
| 30827  | CXXC1     | CXXC finger protein 1                                                                                            |
| 80896  | NPL       | N-acetylneuraminate pyruvate lyase (dihydropicolinate synthase)                                                  |
| 7466   | WFS1      | Wolfram syndrome 1 (wolframin)                                                                                   |
| 5337   | PLD1      | phospholipase D1, phosphatidylcholine-specific                                                                   |
| 55353  | LAPTM4B   | lysosomal protein transmembrane 4 beta                                                                           |
| 1603   | DAD1      | defender against cell death 1                                                                                    |
| 283316 | CD163L1   | CD163 molecule-like 1                                                                                            |
| 1837   | DTNA      | dystrobrevin, alpha                                                                                              |
| 9404   | LPXN      | leupaxin                                                                                                         |
| 5660   | PSAP      | prosaposin                                                                                                       |
| 3783   | KCNN4     | potassium intermediate/small conductance calcium-activated channel, subfamily N, member 4                        |
| 9454   | HOMER3    | homer homolog 3 (Drosophila)                                                                                     |
| 360132 | FKBP9L    | FK506 binding protein 9-like                                                                                     |
| 9853   | RUSC2     | RUN and SH3 domain containing 2                                                                                  |
| 9935   | MAFB      | v-maf musculoaponeurotic fibrosarcoma oncogene homolog B (avian)                                                 |
| 200030 | NBPF11    | neuroblastoma breakpoint family, member 11                                                                       |
| 93663  | ARHGAP18  | Rho GTPase activating protein 18                                                                                 |
| 29100  | TMEM208   | transmembrane protein 208                                                                                        |
| 666    | BOK       | BCL2-related ovarian killer                                                                                      |
| 85012  | TCEAL3    | transcription elongation factor A (SII)-like 3                                                                   |
| 8714   | ABCC3     | ATP-binding cassette, sub-family C (CFTR/MRP), member 3                                                          |
| 4245   | MGAT1     | mannosyl (alpha-1,3-)-glycoprotein beta-1,2-N-acetylglucosaminyltransferase                                      |
| 719    | C3AR1     | complement component 3a receptor 1                                                                               |
| 79921  | TCEAL4    | transcription elongation factor A (SII)-like 4                                                                   |
| 84446  | BRSK1     | BR serine/threonine kinase 1                                                                                     |
| 1803   | DPP4      | dipeptidyl-peptidase 4                                                                                           |
| 79567  | FAM65A    | family with sequence similarity 65, member A                                                                     |
| 27018  | NGFRAP1   | nerve growth factor receptor (TNFRSF16) associated protein 1                                                     |
| 8605   | PLA2G4C   | phospholipase A2, group IVC (cytosolic, calcium-independent)                                                     |
| 341405 | ANKRD33   | ankyrin repeat domain 33                                                                                         |
| 55365  | TMEM176A  | transmembrane protein 176A                                                                                       |
| 929    | CD14      | CD14 molecule                                                                                                    |
| 1601   | DAB2      | disabled homolog 2, mitogen-responsive phosphoprotein (Drosophila)                                               |
| 51309  | ARMCX1    | armadillo repeat containing, X-linked 1                                                                          |
| 3964   | LGALS8    | lectin, galactoside-binding, soluble, 8                                                                          |
| 55756  | INTS9     | integrator complex subunit 9                                                                                     |
| 55665  | URGCP     | upregulator of cell proliferation                                                                                |
| 8706   | B3GALNT1  | beta-1,3-N-acetylgalactosaminyltransferase 1 (globoside blood group)                                             |
| 29948  | OSGIN1    | oxidative stress induced growth inhibitor 1                                                                      |
| 64218  | SEMA4A    | sema domain, immunoglobulin domain (Ig), transmembrane domain (TM) and short cytoplasmic domain, (semaphorin) 4A |
| 2040   | STOM      | stomatin                                                                                                         |
| 200558 | APLF      | aprataxin and PNKP like factor                                                                                   |
| 6774   | STAT3     | signal transducer and activator of transcription 3 (acute-phase response factor)                                 |
| 2055   | CLN8      | ceroid-lipofuscinosis, neuronal 8 (epilepsy, progressive with mental retardation)                                |
| 203069 | R3HCC1    | R3H domain and coiled-coil containing 1                                                                          |
| 27151  | CPAMD8    | C3 and PZP-like, alpha-2-macroglobulin domain containing 8                                                       |
| 1508   | CTSB      | cathepsin B                                                                                                      |
| 10863  | ADAM28    | ADAM metallopeptidase domain 28                                                                                  |
| 374882 | TMEM205   | transmembrane protein 205                                                                                        |
| 112770 | C1orf85   | chromosome 1 open reading frame 85                                                                               |
| 23357  | ANGEL1    | angel homolog 1 (Drosophila)                                                                                     |
| 221496 | LEMD2     | LEM domain containing 2                                                                                          |
| 55051  | C14orf102 | chromosome 14 open reading frame 102                                                                             |
| 3311   | HSPA7     | heat shock 70kDa protein 7 (HSP70B)                                                                              |
| 1030   | CDKN2B    | cyclin-dependent kinase inhibitor 2B (p15, inhibits CDK4)                                                        |
| 57514  | ARHGAP31  | Rho GTPase activating protein 31                                                                                 |
| 3074   | HEXB      | hexosaminidase B (beta polypeptide)                                                                              |
| 8674   | VAMP4     | vesicle-associated membrane protein 4                                                                            |
| 11188  | NISCH     | nischarin                                                                                                        |
| 374395 | TMEM179B  | transmembrane protein 179B                                                                                       |
| 339344 | MYPOP     | Myb-related transcription factor, partner of profilin                                                            |
| 755    | C21orf2   | chromosome 21 open reading frame 2                                                                               |
| 84875  | PARP10    | poly (ADP-ribose) polymerase family, member 10                                                                   |
| 84193  | SETD3     | SET domain containing 3                                                                                          |
| 9637   | FEZ2      | fasciculation and elongation protein zeta 2 (zyg II)                                                             |
| 10312  | TCIRG1    | T-cell, immune regulator 1, ATPase, H+ transporting, lysosomal V0 subunit A3                                     |
| 127066 | OR14C36   | olfactory receptor, family 14, subfamily C, member 36                                                            |
| 5732   | PTGER2    | prostaglandin E receptor 2 (subtype EP2), 53kDa                                                                  |
| 144402 | CPNE8     | copine VIII                                                                                                      |
| 64411  | ARAP3     | ArfGAP with RhoGAP domain, ankyrin repeat and PH domain 3                                                        |
| 8943   | AP3D1     | adaptor-related protein complex 3, delta 1 subunit                                                               |
| 527    | ATP6V0C   | ATPase, H+ transporting, lysosomal 16kDa, V0 subunit c                                                           |
| 140467 | ZNF358    | zinc finger protein 358                                                                                          |
| 26175  | C14orf109 | chromosome 14 open reading frame 109                                                                             |
| 4126   | MANBA     | mannosidase, beta A, lysosomal                                                                                   |
| 63906  | GPATCH3   | G patch domain containing 3                                                                                      |
| 54453  | RIN2      | Ras and Rab interactor 2                                                                                         |
| 29992  | PILRA     | paired immunoglobulin-like type 2 receptor alpha                                                                 |
| 85450  | ITPRIP    | inositol 1,4,5-triphosphate receptor interacting protein                                                         |
| 53     | ACP2      | acid phosphatase 2, lysosomal                                                                                    |
| 6453   | ITSN1     | intersectin 1 (SH3 domain protein)                                                                               |
| 1793   | DOCK1     | dedicator of cytokinesis 1                                                                                       |
| 54103  | PION      | pigeon homolog (Drosophila)                                                                                      |
| 10985  | GCN1L1    | GCN1 general control of amino-acid synthesis 1-like 1 (yeast)                                                    |
| 90843  | TCEAL8    | transcription elongation factor A (SII)-like 8                                                                   |
| 27128  | CYTH4     | cytohesin 4                                                                                                      |
| 9839   | ZEB2      | zinc finger E-box binding homeobox 2                                                                             |
| 2770   | GNAI1     | guanine nucleotide binding protein (G protein), alpha inhibiting activity polypeptide 1                          |
| 10455  | PECI      | peroxisomal D3,D2-enoyl-CoA isomerase                                                                            |
| 3916   | LAMP1     | lysosomal-associated membrane protein 1                                                                          |
| 837    | CASP4     | caspase 4, apoptosis-related cysteine peptidase                                                                  |
| 11213  | IRAK3     | interleukin-1 receptor-associated kinase 3                                                                       |

|           |              |                                                                                          |
|-----------|--------------|------------------------------------------------------------------------------------------|
| 22918     | CD93         | CD93 molecule                                                                            |
| 116832    | RPL39L       | ribosomal protein L39-like                                                               |
| 1051      | CEBPB        | CCAAT/enhancer binding protein (C/EBP), beta                                             |
| 203054    | ADCK5        | aarF domain containing kinase 5                                                          |
| 54856     | GON4L        | gon-4-like (C. elegans)                                                                  |
| 5210      | PFKFB4       | 6-phosphofructo-2-kinase/fructose-2,6-biphosphatase 4                                    |
| 968       | CD68         | CD68 molecule                                                                            |
| 8495      | PPFIBP2      | PTPRF interacting protein, binding protein 2 (liprin beta 2)                             |
| 55748     | CNDP2        | CNDP dipeptidase 2 (metallopeptidase M20 family)                                         |
| 79168     | LILRA6       | leukocyte immunoglobulin-like receptor, subfamily A (with TM domain), member 6           |
| 64784     | CRTC3        | CREB regulated transcription coactivator 3                                               |
| 84034     | EMILIN2      | elastin microfibril interfacier 2                                                        |
| 23247     | KIAA0556     | KIAA0556                                                                                 |
| 2799      | GNS          | glucosamine (N-acetyl)-6-sulfatase                                                       |
| 10410     | IFITM3       | interferon induced transmembrane protein 3 (1-8U)                                        |
| 3628      | INPP1        | inositol polyphosphate-1-phosphatase                                                     |
| 100129550 | LOC100129550 | hypothetical LOC100129550                                                                |
| 10581     | IFITM2       | interferon induced transmembrane protein 2 (1-8D)                                        |
| 79720     | VPS37B       | vacuolar protein sorting 37 homolog B (S. cerevisiae)                                    |
| 57794     | SUGP1        | SURP and G patch domain containing 1                                                     |
| 51296     | SLC15A3      | solute carrier family 15, member 3                                                       |
| 3987      | LIMS1        | LIM and senescent cell antigen-like domains 1                                            |
| 1436      | CSF1R        | colony stimulating factor 1 receptor                                                     |
| 11025     | LILRB3       | leukocyte immunoglobulin-like receptor, subfamily B (with TM and ITIM domains), member 3 |
| 9061      | PAPSS1       | 3'-phosphoadenosine 5'-phosphosulfate synthase 1                                         |
| 151888    | BTLA         | B and T lymphocyte associated                                                            |
| 834       | CASP1        | caspase 1, apoptosis-related cysteine peptidase (interleukin 1, beta, convertase)        |

#### CD14+ skin DC (downregulated genes)

| ENTREZ ID | Gene Symbol | Gene Name                                                                               |
|-----------|-------------|-----------------------------------------------------------------------------------------|
| 2021      | ENDOG       | endonuclease G                                                                          |
| 10659     | CEL2F       | CUGBP, Elav-like family member 2                                                        |
| 3784      | KCNQ1       | potassium voltage-gated channel, KQT-like subfamily, member 1                           |
| 6210      | RPS15A      | ribosomal protein S15a                                                                  |
| 51187     | RSL24D1     | ribosomal L24 domain containing 1                                                       |
| 51155     | HN1         | hematological and neurological expressed 1                                              |
| 23354     | HAUS5       | HAUS augmin-like complex, subunit 5                                                     |
| 57326     | PBXIP1      | pre-B-cell leukemia homeobox interacting protein 1                                      |
| 2322      | FLT3        | fms-related tyrosine kinase 3                                                           |
| 162979    | ZNF296      | zinc finger protein 296                                                                 |
| 9185      | REPS2       | RALBP1 associated Eps domain containing 2                                               |
| 1933      | EEF1B2      | eukaryotic translation elongation factor 1 beta 2                                       |
| 401647    | GOLGA7B     | golgin A7 family, member B                                                              |
| 2852      | GPER        | G protein-coupled estrogen receptor 1                                                   |
| 158358    | KIAA2026    | KIAA2026                                                                                |
| 57599     | WDR48       | WD repeat domain 48                                                                     |
| 5981      | RFC1        | replication factor C (activator 1) 1, 145kDa                                            |
| 26060     | APPL1       | adaptor protein, phosphotyrosine interaction, PH domain and leucine zipper containing 1 |
| 1595      | CYP51A1     | cytochrome P450, family 51, subfamily A, polypeptide 1                                  |
| 6891      | TAP2        | transporter 2, ATP-binding cassette, sub-family B (MDR/TAP)                             |
| 9991      | ROD1        | ROD1 regulator of differentiation 1 (S. pombe)                                          |
| 4724      | NDUFS4      | NADH dehydrogenase (ubiquinone) Fe-S protein 4, 18kDa (NADH-coenzyme Q reductase)       |
| 493       | ATP2B4      | ATPase, Ca <sup>++</sup> transporting, plasma membrane 4                                |
| 6207      | RPS13       | ribosomal protein S13                                                                   |
| 51056     | LAP3        | leucine aminopeptidase 3                                                                |
| 8850      | KAT2B       | K(lysine) acetyltransferase 2B                                                          |
| 3476      | IGBP1       | immunoglobulin (CD79A) binding protein 1                                                |
| 55911     | APOBR       | apolipoprotein B receptor                                                               |
| 6421      | SFPQ        | splicing factor proline/glutamine-rich                                                  |
| 51199     | NIN         | ninein (GSK3B interacting protein)                                                      |
| 80145     | THOC7       | THO complex 7 homolog (Drosophila)                                                      |
| 728643    | LOC728643   | heterogeneous nuclear ribonucleoprotein A1 pseudogene                                   |
| 90990     | KIFC2       | kinesin family member C2                                                                |
| 57591     | MKL1        | megakaryoblastic leukemia (translocation) 1                                             |
| 118433    | RPL23AP7    | ribosomal protein L23a pseudogene 7                                                     |
| 79791     | FBXO31      | F-box protein 31                                                                        |
| 6235      | RPS29       | ribosomal protein S29                                                                   |
| 6640      | SNTA1       | syntrophin, alpha 1 (dystrophin-associated protein A1, 59kDa, acidic component)         |
| 23625     | FAM89B      | family with sequence similarity 89, member B                                            |
| 8099      | CDK2AP1     | cyclin-dependent kinase 2 associated protein 1                                          |
| 1316      | KLF6        | Kruppel-like factor 6                                                                   |
| 10890     | RAB10       | RAB10, member RAS oncogene family                                                       |
| 338707    | B4GALNT4    | beta-1,4-N-acetyl-galactosaminyl transferase 4                                          |
| 5223      | PGAM1       | phosphoglycerate mutase 1 (brain)                                                       |
| 55915     | LANCL2      | LanC lantibiotic synthetase component C-like 2 (bacterial)                              |
| 4627      | MYH9        | myosin, heavy chain 9, non-muscle                                                       |
| 6202      | RPS8        | ribosomal protein S8                                                                    |
| 5170      | PDPK1       | 3-phosphoinositide dependent protein kinase-1                                           |
| 5993      | RFX5        | regulatory factor X, 5 (influences HLA class II expression)                             |
| 100130613 | CXorf64     | chromosome X open reading frame 64                                                      |
| 51559     | NT5DC3      | 5'-nucleotidase domain containing 3                                                     |
| 388574    | FLJ43681    | ribosomal protein L23a pseudogene                                                       |
| 171586    | ABHD3       | abhydrolase domain containing 3                                                         |
| 57106     | NAT14       | N-acetyltransferase 14 (GCN5-related, putative)                                         |
| 54414     | SIAE        | sialic acid acetyltransferase                                                           |
| 348180    | CTU2        | cytosolic thiouridylase subunit 2 homolog (S. pombe)                                    |
| 909       | CD1A        | CD1a molecule                                                                           |
| 9744      | ACAP1       | ArfGAP with coiled-coil, ankyrin repeat and PH domains 1                                |
| 157       | ADRBK2      | adrenergic, beta, receptor kinase 2                                                     |
| 5090      | PBX3        | pre-B-cell leukemia homeobox 3                                                          |
| 2729      | GCLC        | glutamate-cysteine ligase, catalytic subunit                                            |
| 7791      | ZYX         | zyxin                                                                                   |
| 26750     | RPS6KC1     | ribosomal protein S6 kinase, 52kDa, polypeptide 1                                       |
| 2529      | FUT7        | fucosyltransferase 7 (alpha (1,3) fucosyltransferase)                                   |
| 10627     | MYL12A      | myosin, light chain 12A, regulatory, non-sarcomeric                                     |

|           |              |                                                                          |
|-----------|--------------|--------------------------------------------------------------------------|
| 1633      | DCK          | deoxycytidine kinase                                                     |
| 54149     | C21orf91     | chromosome 21 open reading frame 91                                      |
| 6050      | RNH1         | ribonuclease/angiogenin inhibitor 1                                      |
| 6164      | RPL34        | ribosomal protein L34                                                    |
| 23157     | SEPT6        | septin 6                                                                 |
| 2534      | FYN          | FYN oncogene related to SRC, FGR, YES                                    |
| 23240     | KIAA0922     | KIAA0922                                                                 |
| 8869      | ST3GAL5      | ST3 beta-galactoside alpha-2,3-sialyltransferase 5                       |
| 3338      | DNAJC4       | DnaJ (Hsp40) homolog, subfamily C, member 4                              |
| 57185     | NIPAL3       | NIPA-like domain containing 3                                            |
| 3422      | IDI1         | isopentenyl-diphosphate delta isomerase 1                                |
| 2788      | NGF          | guanine nucleotide binding protein (G protein), gamma 7                  |
| 55300     | PI4K2B       | phosphatidylinositol 4-kinase type 2 beta                                |
| 57579     | FAM135A      | family with sequence similarity 135, member A                            |
| 729786    | GOLGA8C      | golgin A8 family, member C                                               |
| 132720    | C4orf32      | chromosome 4 open reading frame 32                                       |
| 8622      | PDE8B        | phosphodiesterase 8B                                                     |
| 60        | ACTB         | actin, beta                                                              |
| 11138     | TBC1D8       | TBC1 domain family, member 8 (with GRAM domain)                          |
| 8934      | RAB7L1       | RAB7, member RAS oncogene family-like 1                                  |
| 22955     | SCMH1        | sex comb on midleg homolog 1 (Drosophila)                                |
| 81539     | SLC38A1      | solute carrier family 38, member 1                                       |
| 57037     | ANKMY2       | ankyrin repeat and MYND domain containing 2                              |
| 79705     | LRRK1        | leucine-rich repeat kinase 1                                             |
| 152559    | PAQR3        | progesterin and adipoQ receptor family member III                        |
| 5664      | PSEN2        | presenilin 2 (Alzheimer disease 4)                                       |
| 166614    | DCLK2        | doublecortin-like kinase 2                                               |
| 728743    | LOC728743    | similar to GLI-Kruppel family member HKR1                                |
| 23483     | TGDS         | TDP-glucose 4,6-dehydratase                                              |
| 160335    | TMTC2        | transmembrane and tetratricopeptide repeat containing 2                  |
| 2766      | GMPR         | guanosine monophosphate reductase                                        |
| 55266     | TMEM19       | transmembrane protein 19                                                 |
| 81552     | VOPP1        | vesicular, overexpressed in cancer, prosurvival protein 1                |
| 4065      | LY75         | lymphocyte antigen 75                                                    |
| 79630     | C1orf54      | chromosome 1 open reading frame 54                                       |
| 25873     | RPL36        | ribosomal protein L36                                                    |
| 165530    | CLEC4F       | C-type lectin domain family 4, member F                                  |
| 921       | CD5          | CD5 molecule                                                             |
| 84057     | MND1         | meiotic nuclear divisions 1 homolog (S. cerevisiae)                      |
| 89958     | C9orf140     | chromosome 9 open reading frame 140                                      |
| 220963    | SLC16A9      | solute carrier family 16, member 9 (monocarboxylic acid transporter 9)   |
| 79762     | C1orf115     | chromosome 1 open reading frame 115                                      |
| 51205     | ACP6         | acid phosphatase 6, lysosphosphatidic                                    |
| 81606     | LBH          | limb bud and heart development homolog (mouse)                           |
| 4810      | NHS          | Nance-Horan syndrome (congenital cataracts and dental anomalies)         |
| 55086     | CXorf57      | chromosome X open reading frame 57                                       |
| 154313    | C6orf165     | chromosome 6 open reading frame 165                                      |
| 5527      | PPP2R5C      | protein phosphatase 2, regulatory subunit B', gamma                      |
| 57705     | WDFY4        | WDFY family member 4                                                     |
| 9760      | TOX          | thymocyte selection-associated high mobility group box                   |
| 2833      | CXCR3        | chemokine (C-X-C motif) receptor 3                                       |
| 100505501 | LOC100505501 | hypothetical LOC100505501                                                |
| 79656     | BEND5        | BEN domain containing 5                                                  |
| 81620     | CDT1         | chromatin licensing and DNA replication factor 1                         |
| 5368      | PNOC         | prepronociceptin                                                         |
| 7984      | ARHGEF5      | Rho guanine nucleotide exchange factor (GEF) 5                           |
| 946       | SIGLEC6      | sialic acid binding Ig-like lectin 6                                     |
| 22874     | PLEKHA6      | pleckstrin homology domain containing, family A member 6                 |
| 7710      | ZNF154       | zinc finger protein 154                                                  |
| 2047      | EPHB1        | EPH receptor B1                                                          |
| 9901      | SRGAP3       | SLIT-ROBO Rho GTPase activating protein 3                                |
| 84433     | CARD11       | caspase recruitment domain family, member 11                             |
| 9806      | SPOCK2       | sparc/osteonectin, cwcv and kazal-like domains proteoglycan (testican) 2 |
| 219902    | TMEM136      | transmembrane protein 136                                                |

#### CD14+ blood monocytes (upregulated genes)

| ENTREZ ID | Gene Symbol | Gene Name                                                                           |
|-----------|-------------|-------------------------------------------------------------------------------------|
| 929       | CD14        | CD14 molecule                                                                       |
| 83716     | CRISPLD2    | cysteine-rich secretory protein LCCL domain containing 2                            |
| 199675    | C19orf59    | chromosome 19 open reading frame 59                                                 |
| 117144    | CATSPER1    | cation channel, sperm associated 1                                                  |
| 1593      | CYP27A1     | cytochrome P450, family 27, subfamily A, polypeptide 1                              |
| 10855     | HPSE        | heparanase                                                                          |
| 1903      | S1PR3       | sphingosine-1-phosphate receptor 3                                                  |
| 83478     | ARHGAP24    | Rho GTPase activating protein 24                                                    |
| 6583      | SLC22A4     | solute carrier family 22 (organic cation/ergothioneine transporter), member 4       |
| 3176      | HNMT        | histamine N-methyltransferase                                                       |
| 389634    | LOC389634   | hypothetical LOC389634                                                              |
| 666       | BOK         | BCL2-related ovarian killer                                                         |
| 9332      | CD163       | CD163 molecule                                                                      |
| 6556      | SLC11A1     | solute carrier family 11 (proton-coupled divalent metal ion transporters), member 1 |
| 53826     | FXYP6       | FXYP domain containing ion transport regulator 6                                    |
| 150365    | MEI1        | meiosis inhibitor 1                                                                 |
| 57616     | TSHZ3       | teashirt zinc finger homeobox 3                                                     |
| 55365     | TMEM176A    | transmembrane protein 176A                                                          |
| 5476      | CTSA        | cathepsin A                                                                         |
| 2162      | F13A1       | coagulation factor XIII, A1 polypeptide                                             |
| 5724      | PTAFR       | platelet-activating factor receptor                                                 |
| 79971     | WLS         | wntless homolog (Drosophila)                                                        |
| 1462      | VCAN        | versican                                                                            |
| 9466      | IL27RA      | interleukin 27 receptor, alpha                                                      |
| 641649    | TMEM91      | transmembrane protein 91                                                            |
| 3240      | HP          | haptoglobin                                                                         |



|           |          |                                                                                  |
|-----------|----------|----------------------------------------------------------------------------------|
| 326       | AIRE     | autoimmune regulator                                                             |
| 1991      | ELANE    | elastase, neutrophil expressed                                                   |
| 10970     | CKAP4    | cytoskeleton-associated protein 4                                                |
| 285550    | FAM200B  | family with sequence similarity 200, member B                                    |
| 5595      | MAPK3    | mitogen-activated protein kinase 3                                               |
| 64411     | ARAP3    | ArfGAP with RhoGAP domain, ankyrin repeat and PH domain 3                        |
| 84446     | BRSK1    | BR serine/threonine kinase 1                                                     |
| 4810      | NHS      | Nance-Horan syndrome (congenital cataracts and dental anomalies)                 |
| 100132417 | FCGR1C   | Fc fragment of IgG, high affinity 1c, receptor (CD64)                            |
| 9853      | RUSC2    | RUN and SH3 domain containing 2                                                  |
| 51734     | SEPX1    | selenoprotein X, 1                                                               |
| 3148      | HMGB2    | high-mobility group box 2                                                        |
| 441251    | SPDYE7P  | speedy homolog E7 (Xenopus laevis), pseudogene                                   |
| 11152     | WDR45    | WD repeat domain 45                                                              |
| 54540     | FAM193B  | family with sequence similarity 193, member B                                    |
| 4257      | MGST1    | microsomal glutathione S-transferase 1                                           |
| 9454      | HOMER3   | homer homolog 3 (Drosophila)                                                     |
| 2054      | STX2     | syntaxin 2                                                                       |
| 55357     | TBC1D2   | TBC1 domain family, member 2                                                     |
| 8819      | SAP30    | Sin3A-associated protein, 30kDa                                                  |
| 54210     | TREM1    | triggering receptor expressed on myeloid cells 1                                 |
| 4999      | ORC2     | origin recognition complex, subunit 2                                            |
| 4043      | LRPAP1   | low density lipoprotein receptor-related protein associated protein 1            |
| 83719     | YPEL3    | yippee-like 3 (Drosophila)                                                       |
| 80896     | NPL      | N-acetylneuraminatase pyruvate lyase (dihydrodipicolinate synthase)              |
| 27151     | CPAMD8   | C3 and PZP-like, alpha-2-macroglobulin domain containing 8                       |
| 51280     | GOLM1    | golgi membrane protein 1                                                         |
| 7739      | ZNF185   | zinc finger protein 185 (LIM domain)                                             |
| 113277    | TMEM106A | transmembrane protein 106A                                                       |
| 79954     | NOL10    | nucleolar protein 10                                                             |
| 23166     | STAB1    | stabilin 1                                                                       |
| 55890     | GPRC5C   | G protein-coupled receptor, family C, group 5, member C                          |
| 79939     | SLC35E1  | solute carrier family 35, member E1                                              |
| 360132    | FKBP9L   | FK506 binding protein 9-like                                                     |
| 6993      | DYNLT1   | dynein, light chain, Tctex-type 1                                                |
| 151011    | SEPT10   | septin 10                                                                        |
| 91663     | MYADM    | myeloid-associated differentiation marker                                        |
| 53346     | TM6SF1   | transmembrane 6 superfamily member 1                                             |
| 122402    | TDRD9    | tudor domain containing 9                                                        |
| 341405    | ANKRD33  | ankyrin repeat domain 33                                                         |
| 80267     | EDEM3    | ER degradation enhancer, mannosidase alpha-like 3                                |
| 23590     | PDSS1    | prenyl (decaprenyl) diphosphate synthase, subunit 1                              |
| 401082    | FLJ25363 | hypothetical LOC401082                                                           |
| 28959     | TMEM176B | transmembrane protein 176B                                                       |
| 3957      | LGALS2   | lectin, galactoside-binding, soluble, 2                                          |
| 144402    | CPNE8    | copine VIII                                                                      |
| 51102     | MECR     | mitochondrial trans-2-enoyl-CoA reductase                                        |
| 116832    | RPL39L   | ribosomal protein L39-like                                                       |
| 440836    | ODF3B    | outer dense fiber of sperm tails 3B                                              |
| 3949      | LDLR     | low density lipoprotein receptor                                                 |
| 10205     | MPZL2    | myelin protein zero-like 2                                                       |
| 10144     | FAM13A   | family with sequence similarity 13, member A                                     |
| 7099      | TLR4     | toll-like receptor 4                                                             |
| 944       | TNFSF8   | tumor necrosis factor (ligand) superfamily, member 8                             |
| 10924     | SMPDL3A  | sphingomyelin phosphodiesterase, acid-like 3A                                    |
| 9935      | MAFB     | v-maf musculoaponeurotic fibrosarcoma oncogene homolog B (avian)                 |
| 9821      | RB1CC1   | RB1-inducible coiled-coil 1                                                      |
| 317781    | DDX51    | DEAD (Asp-Glu-Ala-Asp) box polypeptide 51                                        |
| 1066      | CES1     | carboxylesterase 1                                                               |
| 339390    | CLEC4G   | C-type lectin domain family 4, member G                                          |
| 9592      | IER2     | immediate early response 2                                                       |
| 121551    | BTBD11   | BTB (POZ) domain containing 11                                                   |
| 91750     | LIN52    | lin-52 homolog (C. elegans)                                                      |
| 6540      | SLC6A13  | solute carrier family 6 (neurotransmitter transporter, GABA), member 13          |
| 5768      | QSOX1    | quiescin Q6 sulfhydryl oxidase 1                                                 |
| 51304     | ZDHHC3   | zinc finger, DHHC-type containing 3                                              |
| 2048      | EPHB2    | EPH receptor B2                                                                  |
| 114785    | MBD6     | methyl-CpG binding domain protein 6                                              |
| 126014    | OSCAR    | osteoclast associated, immunoglobulin-like receptor                              |
| 197259    | MLKL     | mixed lineage kinase domain-like                                                 |
| 6752      | SSTR2    | somatostatin receptor 2                                                          |
| 146223    | CMTM4    | CKLF-like MARVEL transmembrane domain containing 4                               |
| 9397      | NMT2     | N-myristoyltransferase 2                                                         |
| 2150      | F2RL1    | coagulation factor II (thrombin) receptor-like 1                                 |
| 2644      | GCHFR    | GTP cyclohydrolase I feedback regulator                                          |
| 80867     | HCG2P7   | HLA complex group 2 pseudogene 7                                                 |
| 221662    | RBM24    | RNA binding motif protein 24                                                     |
| 84255     | SLC37A3  | solute carrier family 37 (glycerol-3-phosphate transporter), member 3            |
| 7226      | TRPM2    | transient receptor potential cation channel, subfamily M, member 2               |
| 404636    | FAM45A   | family with sequence similarity 45, member A                                     |
| 87178     | PNPT1    | polyribonucleotide nucleotidyltransferase 1                                      |
| 55711     | FAR2     | fatty acyl CoA reductase 2                                                       |
| 51311     | TLR8     | toll-like receptor 8                                                             |
| 11188     | NISCH    | nischarin                                                                        |
| 4923      | NTSR1    | neurotensin receptor 1 (high affinity)                                           |
| 6774      | STAT3    | signal transducer and activator of transcription 3 (acute-phase response factor) |
| 116988    | AGAP3    | ArfGAP with GTPase domain, ankyrin repeat and PH domain 3                        |
| 11270     | NRM      | nurim (nuclear envelope membrane protein)                                        |
| 374882    | TMEM205  | transmembrane protein 205                                                        |
| 5914      | RARA     | retinoic acid receptor, alpha                                                    |
| 7554      | ZNF8     | zinc finger protein 8                                                            |
| 221037    | JMJD1C   | jumonji domain containing 1C                                                     |
| 137835    | TMEM71   | transmembrane protein 71                                                         |
| 9232      | PTTG1    | pituitary tumor-transforming 1                                                   |
| 54507     | ADAMTSL4 | ADAMTS-like 4                                                                    |

|           |              |                                                                                               |
|-----------|--------------|-----------------------------------------------------------------------------------------------|
| 116092    | DNTTIP1      | deoxynucleotidyltransferase, terminal, interacting protein 1                                  |
| 3636      | INPPL1       | inositol polyphosphate phosphatase-like 1                                                     |
| 4117      | MAK          | male germ cell-associated kinase                                                              |
| 3074      | HEXB         | hexosaminidase B (beta polypeptide)                                                           |
| 8569      | MKNK1        | MAP kinase interacting serine/threonine kinase 1                                              |
| 1513      | CTSK         | cathepsin K                                                                                   |
| 283       | ANG          | angiogenin, ribonuclease, RNase A family, 5                                                   |
| 5873      | RAB27A       | RAB27A, member RAS oncogene family                                                            |
| 26873     | OPLAH        | 5-oxoprolinase (ATP-hydrolysing)                                                              |
| 10542     | HBXIP        | hepatitis B virus x interacting protein                                                       |
| 319085    | ITPK1-AS1    | ITPK1 antisense RNA 1 (non-protein coding)                                                    |
| 142679    | DUSP19       | dual specificity phosphatase 19                                                               |
| 55238     | SLC38A7      | solute carrier family 38, member 7                                                            |
| 23514     | KIAA0146     | KIAA0146                                                                                      |
| 147372    | CCBE1        | collagen and calcium binding EGF domains 1                                                    |
| 1871      | E2F3         | E2F transcription factor 3                                                                    |
| 117155    | CATSPER2     | cation channel, sperm associated 2                                                            |
| 11330     | CTRC         | chymotrypsin C (caldecrin)                                                                    |
| 285172    | FAM126B      | family with sequence similarity 126, member B                                                 |
| 79992     | NCRNA00241   | non-protein coding RNA 241                                                                    |
| 399761    | BMS1P5       | BMS1 pseudogene 5                                                                             |
| 54453     | RIN2         | Ras and Rab interactor 2                                                                      |
| 93589     | CACNA2D4     | calcium channel, voltage-dependent, alpha 2/delta subunit 4                                   |
| 27348     | TOR1B        | torsin family 1, member B (torsin B)                                                          |
| 57190     | SEPN1        | selenoprotein N, 1                                                                            |
| 374875    | HSD11B1L     | hydroxysteroid (11-beta) dehydrogenase 1-like                                                 |
| 80325     | ABTB1        | ankyrin repeat and BTB (POZ) domain containing 1                                              |
| 64784     | CRTC3        | CREB regulated transcription coactivator 3                                                    |
| 25798     | BRI3         | brain protein I3                                                                              |
| 3189      | HNRNPH3      | heterogeneous nuclear ribonucleoprotein H3 (2H9)                                              |
| 79847     | TMEM180      | transmembrane protein 180                                                                     |
| 7791      | ZYX          | zyxin                                                                                         |
| 7456      | WIPF1        | WAS/WASL interacting protein family, member 1                                                 |
| 388692    | LOC388692    | hypothetical LOC388692                                                                        |
| 64645     | HIAT1        | hippocampus abundant transcript 1                                                             |
| 9051      | PSTPIP1      | proline-serine-threonine phosphatase interacting protein 1                                    |
| 151636    | DTX3L        | deltex 3-like (Drosophila)                                                                    |
| 1138      | CHRNA5       | cholinergic receptor, nicotinic, alpha 5                                                      |
| 607       | BCL9         | B-cell CLL/lymphoma 9                                                                         |
| 3241      | HPCAL1       | hippocalcin-like 1                                                                            |
| 79042     | TSEN34       | tRNA splicing endonuclease 34 homolog (S. cerevisiae)                                         |
| 54930     | HAUS4        | HAUS augmin-like complex, subunit 4                                                           |
| 3682      | ITGAE        | integrin, alpha E (antigen CD103, human mucosal lymphocyte antigen 1; alpha polypeptide)      |
| 57477     | SHROOM4      | shroom family member 4                                                                        |
| 6548      | SLC9A1       | solute carrier family 9 (sodium/hydrogen exchanger), member 1                                 |
| 100129550 | LOC100129550 | hypothetical LOC100129550                                                                     |
| 5184      | PEPD         | peptidase D                                                                                   |
| 8455      | ATRN         | atractin                                                                                      |
| 79168     | LILRA6       | leukocyte immunoglobulin-like receptor, subfamily A (with TM domain), member 6                |
| 4851      | NOTCH1       | notch 1                                                                                       |
| 84572     | GNPTG        | N-acetylglucosamine-1-phosphate transferase, gamma subunit                                    |
| 2869      | GRK5         | G protein-coupled receptor kinase 5                                                           |
| 2526      | FUT4         | fucosyltransferase 4 (alpha (1,3) fucosyltransferase, myeloid-specific)                       |
| 1102      | RCBTB2       | regulator of chromosome condensation (RCC1) and BTB (POZ) domain containing protein 2         |
| 5337      | PLD1         | phospholipase D1, phosphatidylcholine-specific                                                |
| 84293     | C10orf58     | chromosome 10 open reading frame 58                                                           |
| 23474     | ETHE1        | ethylmalonic encephalopathy 1                                                                 |
| 6453      | ITSN1        | intersectin 1 (SH3 domain protein)                                                            |
| 3305      | HSPA1L       | heat shock 70kDa protein 1-like                                                               |
| 7803      | PTP4A1       | protein tyrosine phosphatase type IVA, member 1                                               |
| 9997      | SCO2         | SCO cytochrome oxidase deficient homolog 2 (yeast)                                            |
| 5728      | PTEN         | phosphatase and tensin homolog                                                                |
| 8408      | ULK1         | unc-51-like kinase 1 (C. elegans)                                                             |
| 126272    | EID2B        | EP300 interacting inhibitor of differentiation 2B                                             |
| 29992     | PILRA        | paired immunoglobulin-like type 2 receptor alpha                                              |
| 80736     | SLC44A4      | solute carrier family 44, member 4                                                            |
| 2876      | GPX1         | glutathione peroxidase 1                                                                      |
| 5222      | PGA5         | pepsinogen 5, group I (pepsinogen A)                                                          |
| 1387      | CREBBP       | CREB binding protein                                                                          |
| 220929    | ZNF438       | zinc finger protein 438                                                                       |
| 4354      | MPP1         | membrane protein, palmitoylated 1, 55kDa                                                      |
| 2131      | EXT1         | exostosin 1                                                                                   |
| 55625     | ZDHC7        | zinc finger, DHHC-type containing 7                                                           |
| 474338    | SUMO1P3      | SUMO1 pseudogene 3                                                                            |
| 23167     | EFR3A        | EFR3 homolog A (S. cerevisiae)                                                                |
| 79026     | AHNAK        | AHNAK nucleoprotein                                                                           |
| 4126      | MANBA        | mannosidase, beta A, lysosomal                                                                |
| 23593     | HEBP2        | heme binding protein 2                                                                        |
| 29097     | CNIH4        | cornichon homolog 4 (Drosophila)                                                              |
| 909       | CD1A         | CD1a molecule                                                                                 |
| 706       | TSPO         | translocator protein (18kDa)                                                                  |
| 56895     | AGPAT4       | 1-acylglycerol-3-phosphate O-acyltransferase 4 (lysophosphatidic acid acyltransferase, delta) |
| 9296      | ATP6V1F      | ATPase, H+ transporting, lysosomal 14kDa, V1 subunit F                                        |
| 196383    | RILPL2       | Rab interacting lysosomal protein-like 2                                                      |
| 3156      | HMGCR        | 3-hydroxy-3-methylglutaryl-CoA reductase                                                      |
| 2350      | FOLR2        | folate receptor 2 (fetal)                                                                     |
| 26301     | GBGT1        | globoside alpha-1,3-N-acetylgalactosaminyltransferase 1                                       |
| 57498     | KIDINS220    | kinase D-interacting substrate, 220kDa                                                        |
| 6617      | SNAPC1       | small nuclear RNA activating complex, polypeptide 1, 43kDa                                    |
| 6778      | STAT6        | signal transducer and activator of transcription 6, interleukin-4 induced                     |
| 2885      | GRB2         | growth factor receptor-bound protein 2                                                        |
| 7132      | TNFRSF1A     | tumor necrosis factor receptor superfamily, member 1A                                         |
| 100506144 | LOC100506144 | hypothetical protein LOC100506144                                                             |
| 51621     | KLF13        | Kruppel-like factor 13                                                                        |
| 27239     | GPR162       | G protein-coupled receptor 162                                                                |

|        |           |                                                                                          |
|--------|-----------|------------------------------------------------------------------------------------------|
| 112616 | CMTM7     | CKLF-like MARVEL transmembrane domain containing 7                                       |
| 7462   | LAT2      | linker for activation of T cells family, member 2                                        |
| 138151 | NACC2     | NACC family member 2, BEN and BTB (POZ) domain containing                                |
| 6622   | SNCA      | synuclein, alpha (non A4 component of amyloid precursor)                                 |
| 6277   | S100A6    | S100 calcium binding protein A6                                                          |
| 112770 | C1orf85   | chromosome 1 open reading frame 85                                                       |
| 10673  | TNFSF13B  | tumor necrosis factor (ligand) superfamily, member 13b                                   |
| 63929  | XPNPEP3   | X-prolyl aminopeptidase (aminopeptidase P) 3, putative                                   |
| 88455  | ANKRD13A  | ankyrin repeat domain 13A                                                                |
| 58475  | MS4A7     | membrane-spanning 4-domains, subfamily A, member 7                                       |
| 91351  | DDX60L    | DEAD (Asp-Glu-Ala-Asp) box polypeptide 60-like                                           |
| 65018  | PINK1     | PTEN induced putative kinase 1                                                           |
| 353514 | LILRA5    | leukocyte immunoglobulin-like receptor, subfamily A (with TM domain), member 5           |
| 55654  | TMEM127   | transmembrane protein 127                                                                |
| 4303   | FOXO4     | forkhead box O4                                                                          |
| 55760  | DHX32     | DEAH (Asp-Glu-Ala-His) box polypeptide 32                                                |
| 114548 | NLRP3     | NLR family, pyrin domain containing 3                                                    |
| 9673   | SLC25A44  | solute carrier family 25, member 44                                                      |
| 8650   | NUMB      | numb homolog (Drosophila)                                                                |
| 4245   | MGAT1     | mannosyl (alpha-1,3-)-glycoprotein beta-1,2-N-acetylglucosaminyltransferase              |
| 8266   | UBL4A     | ubiquitin-like 4A                                                                        |
| 29994  | BAZ2B     | bromodomain adjacent to zinc finger domain, 2B                                           |
| 23585  | TMEM50A   | transmembrane protein 50A                                                                |
| 11320  | MGAT4A    | mannosyl (alpha-1,3-)-glycoprotein beta-1,4-N-acetylglucosaminyltransferase, isozyme A   |
| 11070  | TMEM115   | transmembrane protein 115                                                                |
| 463    | ZFX3      | zinc finger homeobox 3                                                                   |
| 10307  | APBB3     | amyloid beta (A4) precursor protein-binding, family B, member 3                          |
| 9577   | BRE       | brain and reproductive organ-expressed (TNFRSF1A modulator)                              |
| 116985 | ARAP1     | ArfGAP with RhoGAP domain, ankyrin repeat and PH domain 1                                |
| 1201   | CLN3      | ceroid-lipofuscinosis, neuronal 3                                                        |
| 5140   | PDE3B     | phosphodiesterase 3B, cGMP-inhibited                                                     |
| 23646  | PLD3      | phospholipase D family, member 3                                                         |
| 54625  | PARP14    | poly (ADP-ribose) polymerase family, member 14                                           |
| 55841  | WWC3      | WWC family member 3                                                                      |
| 126003 | TRAPPC5   | trafficking protein particle complex 5                                                   |
| 5732   | PTGER2    | prostaglandin E receptor 2 (subtype EP2), 53kDa                                          |
| 7704   | ZBTB16    | zinc finger and BTB domain containing 16                                                 |
| 5987   | TRIM27    | tripartite motif containing 27                                                           |
| 219855 | SLC37A2   | solute carrier family 37 (glycerol-3-phosphate transporter), member 2                    |
| 4277   | MICB      | MHC class I polypeptide-related sequence B                                               |
| 8795   | TNFRSF10B | tumor necrosis factor receptor superfamily, member 10b                                   |
| 81844  | TRIM56    | tripartite motif containing 56                                                           |
| 11018  | TMED1     | transmembrane emp24 protein transport domain containing 1                                |
| 6652   | SORD      | sorbitol dehydrogenase                                                                   |
| 57533  | TBC1D14   | TBC1 domain family, member 14                                                            |
| 9354   | UBE4A     | ubiquitination factor E4A (UFD2 homolog, yeast)                                          |
| 51312  | SLC25A37  | solute carrier family 25, member 37                                                      |
| 2720   | GLB1      | galactosidase, beta 1                                                                    |
| 64759  | TNS3      | tensin 3                                                                                 |
| 84034  | EMILIN2   | elastin microfibril interfacier 2                                                        |
| 5351   | PLOD1     | procollagen-lysine 1, 2-oxoglutarate 5-dioxygenase 1                                     |
| 114769 | CARD16    | caspase recruitment domain family, member 16                                             |
| 10981  | RAB32     | RAB32, member RAS oncogene family                                                        |
| 10170  | DHRS9     | dehydrogenase/reductase (SDR family) member 9                                            |
| 9262   | STK17B    | serine/threonine kinase 17b                                                              |
| 9960   | USP3      | ubiquitin specific peptidase 3                                                           |
| 285533 | RNF175    | ring finger protein 175                                                                  |
| 3628   | INPP1     | inositol polyphosphate-1-phosphatase                                                     |
| 1979   | EIF4EBP2  | eukaryotic translation initiation factor 4E binding protein 2                            |
| 10870  | HCST      | hematopoietic cell signal transducer                                                     |
| 57590  | WDFY1     | WD repeat and FYVE domain containing 1                                                   |
| 9470   | EIF4E2    | eukaryotic translation initiation factor 4E family member 2                              |
| 64127  | NOD2      | nucleotide-binding oligomerization domain containing 2                                   |
| 10866  | HCP5      | HLA complex P5                                                                           |
| 1876   | E2F6      | E2F transcription factor 6                                                               |
| 1318   | SLC31A2   | solute carrier family 31 (copper transporters), member 2                                 |
| 79901  | CYBRD1    | cytochrome b reductase 1                                                                 |
| 824    | CAPN2     | calpain 2, (m//l) large subunit                                                          |
| 3459   | IFNGR1    | interferon gamma receptor 1                                                              |
| 5265   | SERPINA1  | serpin peptidase inhibitor, clade A (alpha-1 antiprotease, antitrypsin), member 1        |
| 22918  | CD93      | CD93 molecule                                                                            |
| 55022  | PID1      | phosphotyrosine interaction domain containing 1                                          |
| 11213  | IRAK3     | interleukin-1 receptor-associated kinase 3                                               |
| 10288  | LILRB2    | leukocyte immunoglobulin-like receptor, subfamily B (with TM and ITIM domains), member 2 |
| 23608  | MKRN1     | makorin ring finger protein 1                                                            |
| 96459  | FNIP1     | folliculin interacting protein 1                                                         |
| 2634   | GBP2      | guanylate binding protein 2, interferon-inducible                                        |
| 9446   | GSTO1     | glutathione S-transferase omega 1                                                        |
| 4653   | MYOC      | myocilin, trabecular meshwork inducible glucocorticoid response                          |
| 25977  | NECAP1    | NECAP endocytosis associated 1                                                           |
| 642    | BLMH      | bleomycin hydrolase                                                                      |
| 837    | CASP4     | caspase 4, apoptosis-related cysteine peptidase                                          |
| 2733   | GLE1      | GLE1 RNA export mediator homolog (yeast)                                                 |
| 2799   | GNS       | glucosamine (N-acetyl)-6-sulfatase                                                       |
| 6252   | RTN1      | reticulum 1                                                                              |
| 7045   | TGFBI     | transforming growth factor, beta-induced, 68kDa                                          |
| 85450  | ITPRIP    | inositol 1,4,5-triphosphate receptor interacting protein                                 |
| 1050   | CEBPA     | CCAAT/enhancer binding protein (C/EBP), alpha                                            |
| 27287  | VENTX     | VENT homeobox homolog (Xenopus laevis)                                                   |
| 11025  | LILRB3    | leukocyte immunoglobulin-like receptor, subfamily B (with TM and ITIM domains), member 3 |
| 9046   | DOK2      | docking protein 2, 56kDa                                                                 |
| 8495   | PPFIBP2   | PTPRF interacting protein, binding protein 2 (liprin beta 2)                             |
| 5862   | RAB2A     | RAB2A, member RAS oncogene family                                                        |
| 54861  | SNRK      | SNF related kinase                                                                       |
| 6992   | PPP1R11   | protein phosphatase 1, regulatory (inhibitor) subunit 11                                 |

|        |         |                                                                                   |
|--------|---------|-----------------------------------------------------------------------------------|
| 1389   | CREBL2  | cAMP responsive element binding protein-like 2                                    |
| 4682   | NUBP1   | nucleotide binding protein 1 (MinD homolog, E. coli)                              |
| 7263   | TST     | thiosulfate sulfurtransferase (rhodanese)                                         |
| 3916   | LAMP1   | lysosomal-associated membrane protein 1                                           |
| 7248   | TSC1    | tuberous sclerosis 1                                                              |
| 968    | CD68    | CD68 molecule                                                                     |
| 1051   | CEBPB   | CCAAT/enhancer binding protein (C/EBP), beta                                      |
| 375387 | LRRC33  | leucine rich repeat containing 33                                                 |
| 54103  | PION    | pigeon homolog (Drosophila)                                                       |
| 3098   | HK1     | hexokinase 1                                                                      |
| 5899   | RALB    | v-ral simian leukemia viral oncogene homolog B (ras related; GTP binding protein) |
| 23208  | SYT11   | synaptotagmin XI                                                                  |
| 1436   | CSF1R   | colony stimulating factor 1 receptor                                              |
| 834    | CASP1   | caspase 1, apoptosis-related cysteine peptidase (interleukin 1, beta, convertase) |
| 11033  | ADAP1   | ArfGAP with dual PH domains 1                                                     |
| 51296  | SLC15A3 | solute carrier family 15, member 3                                                |
| 5210   | PFKFB4  | 6-phosphofructo-2-kinase/fructose-2,6-biphosphatase 4                             |

#### CD14+ blood monocytes (downregulated genes)

| ENTREZ ID | Gene Symbol | Gene Name                                                                                                      |
|-----------|-------------|----------------------------------------------------------------------------------------------------------------|
| 10090     | UST         | uronyl-2-sulfotransferase                                                                                      |
| 3111      | HLA-DOA     | major histocompatibility complex, class II, DO alpha                                                           |
| 388962    | BOLA3       | bolA homolog 3 (E. coli)                                                                                       |
| 7430      | EZR         | ezrin                                                                                                          |
| 8099      | CDK2AP1     | cyclin-dependent kinase 2 associated protein 1                                                                 |
| 5800      | PTPRO       | protein tyrosine phosphatase, receptor type, O                                                                 |
| 6047      | RNF4        | ring finger protein 4                                                                                          |
| 55509     | BATF3       | basic leucine zipper transcription factor, ATF-like 3                                                          |
| 84319     | C3orf26     | chromosome 3 open reading frame 26                                                                             |
| 10263     | CDK2AP2     | cyclin-dependent kinase 2 associated protein 2                                                                 |
| 4171      | MCM2        | minichromosome maintenance complex component 2                                                                 |
| 140707    | BRI3BP      | BRI3 binding protein                                                                                           |
| 1163      | CKS1B       | CDC28 protein kinase regulatory subunit 1B                                                                     |
| 80221     | ACSF2       | acyl-CoA synthetase family member 2                                                                            |
| 4673      | NAP1L1      | nucleosome assembly protein 1-like 1                                                                           |
| 55619     | DOCK10      | dedicator of cytokinesis 10                                                                                    |
| 6647      | SOD1        | superoxide dismutase 1, soluble                                                                                |
| 3092      | HIP1        | huntingtin interacting protein 1                                                                               |
| 9978      | RBX1        | ring-box 1, E3 ubiquitin protein ligase                                                                        |
| 23231     | SEL1L3      | sel-1 suppressor of lin-12-like 3 (C. elegans)                                                                 |
| 81608     | FIP1L1      | FIP1 like 1 (S. cerevisiae)                                                                                    |
| 286367    | LOC286367   | FP944                                                                                                          |
| 55737     | VPS35       | vacuolar protein sorting 35 homolog (S. cerevisiae)                                                            |
| 338707    | B4GALNT4    | beta-1,4-N-acetyl-galactosaminyl transferase 4                                                                 |
| 113246    | C12orf57    | chromosome 12 open reading frame 57                                                                            |
| 3615      | IMPDH2      | IMP (inosine 5'-monophosphate) dehydrogenase 2                                                                 |
| 2322      | FLT3        | fms-related tyrosine kinase 3                                                                                  |
| 5250      | SLC25A3     | solute carrier family 25 (mitochondrial carrier; phosphate carrier), member 3                                  |
| 27244     | SESN1       | sestrin 1                                                                                                      |
| 10576     | CCT2        | chaperonin containing TCP1, subunit 2 (beta)                                                                   |
| 2665      | GDI2        | GDP dissociation inhibitor 2                                                                                   |
| 404770    | FAM75B      | family with sequence similarity 75, member B                                                                   |
| 23234     | DNAJC9      | DnaJ (Hsp40) homolog, subfamily C, member 9                                                                    |
| 10172     | ZNF256      | zinc finger protein 256                                                                                        |
| 56061     | UBFD1       | ubiquitin family domain containing 1                                                                           |
| 10606     | PAICS       | phosphoribosylaminoimidazole carboxylase, phosphoribosylaminoimidazole succinocarboxamide synthetase           |
| 51005     | AMDHD2      | amidohydrolase domain containing 2                                                                             |
| 55748     | CNDP2       | CNDP dipeptidase 2 (metallopeptidase M20 family)                                                               |
| 90313     | TP53I13     | tumor protein p53 inducible protein 13                                                                         |
| 339221    | ENPP7       | ectonucleotide pyrophosphatase/phosphodiesterase 7                                                             |
| 6209      | RPS15       | ribosomal protein S15                                                                                          |
| 1503      | CTPS        | CTP synthase                                                                                                   |
| 2972      | BRF1        | BRF1 homolog, subunit of RNA polymerase III transcription initiation factor IIIB (S. cerevisiae)               |
| 4953      | ODC1        | ornithine decarboxylase 1                                                                                      |
| 2287      | FKBP3       | FK506 binding protein 3, 25kDa                                                                                 |
| 11340     | EXOSC8      | exosome component 8                                                                                            |
| 162979    | ZNF296      | zinc finger protein 296                                                                                        |
| 3275      | PRMT2       | protein arginine methyltransferase 2                                                                           |
| 401397    | LOC401397   | hypothetical LOC401397                                                                                         |
| 27346     | TMEM97      | transmembrane protein 97                                                                                       |
| 653162    | RPSAP9      | ribosomal protein SA pseudogene 9                                                                              |
| 8237      | USP11       | ubiquitin specific peptidase 11                                                                                |
| 60343     | FAM3A       | family with sequence similarity 3, member A                                                                    |
| 56271     | BEX4        | brain expressed, X-linked 4                                                                                    |
| 1743      | DLST        | dihydrolipoamide S-succinyltransferase (E2 component of 2-oxo-glutarate complex)                               |
| 10019     | SH2B3       | SH2B adaptor protein 3                                                                                         |
| 90594     | ZNF439      | zinc finger protein 439                                                                                        |
| 274       | BIN1        | bridging integrator 1                                                                                          |
| 8445      | DYRK2       | dual-specificity tyrosine-(Y)-phosphorylation regulated kinase 2                                               |
| 2119      | ETV5        | ets variant 5                                                                                                  |
| 5709      | PSMD3       | proteasome (prosome, macropain) 26S subunit, non-ATPase, 3                                                     |
| 2064      | ERBB2       | v-erb-b2 erythroblastic leukemia viral oncogene homolog 2, neuro/glioblastoma derived oncogene homolog (avian) |
| 1021      | CDK6        | cyclin-dependent kinase 6                                                                                      |
| 1019      | CDK4        | cyclin-dependent kinase 4                                                                                      |
| 10068     | IL18BP      | interleukin 18 binding protein                                                                                 |
| 10093     | ARPC4       | actin related protein 2/3 complex, subunit 4, 20kDa                                                            |
| 5134      | PDCD2       | programmed cell death 2                                                                                        |
| 23157     | SEPT6       | septin 6                                                                                                       |
| 57599     | WDR48       | WD repeat domain 48                                                                                            |
| 6233      | RPS27A      | ribosomal protein S27a                                                                                         |
| 55521     | TRIM36      | tripartite motif containing 36                                                                                 |
| 57823     | SLAMF7      | SLAM family member 7                                                                                           |
| 10096     | ACTR3       | ARP3 actin-related protein 3 homolog (yeast)                                                                   |
| 25849     | PARM1       | prostate androgen-regulated mucin-like protein 1                                                               |
| 440       | ASNS        | asparagine synthetase (glutamine-hydrolyzing)                                                                  |

|        |           |                                                                                                        |
|--------|-----------|--------------------------------------------------------------------------------------------------------|
| 2592   | GALT      | galactose-1-phosphate uridylyltransferase                                                              |
| 10051  | SMC4      | structural maintenance of chromosomes 4                                                                |
| 6261   | RYR1      | ryanodine receptor 1 (skeletal)                                                                        |
| 166614 | DCLK2     | doublecortin-like kinase 2                                                                             |
| 2317   | FLNB      | filamin B, beta                                                                                        |
| 6193   | RPS5      | ribosomal protein S5                                                                                   |
| 8991   | SELENBP1  | selenium binding protein 1                                                                             |
| 79140  | CCDC28B   | coiled-coil domain containing 28B                                                                      |
| 7371   | UCK2      | uridine-cytidine kinase 2                                                                              |
| 8934   | RAB7L1    | RAB7, member RAS oncogene family-like 1                                                                |
| 729786 | GOLGA8C   | golgin A8 family, member C                                                                             |
| 9185   | REPS2     | RALBP1 associated Eps domain containing 2                                                              |
| 51703  | ACSL5     | acyl-CoA synthetase long-chain family member 5                                                         |
| 649946 | RPL23AP64 | ribosomal protein L23a pseudogene 64                                                                   |
| 85453  | TSPYL5    | TSPY-like 5                                                                                            |
| 57600  | FNIP2     | folliculin interacting protein 2                                                                       |
| 23677  | SH3BP4    | SH3-domain binding protein 4                                                                           |
| 770    | CA11      | carbonic anhydrase XI                                                                                  |
| 5176   | SERPINF1  | serpin peptidase inhibitor, clade F (alpha-2 antiplasmin, pigment epithelium derived factor), member 1 |
| 8575   | PRKRA     | protein kinase, interferon-inducible double stranded RNA dependent activator                           |
| 6132   | RPL8      | ribosomal protein L8                                                                                   |
| 729739 | LOC729739 | hypothetical LOC729739                                                                                 |
| 8841   | HDAC3     | histone deacetylase 3                                                                                  |
| 27106  | ARRDC2    | arrestin domain containing 2                                                                           |
| 4839   | NOP2      | NOP2 nucleolar protein homolog (yeast)                                                                 |
| 54843  | SYTL2     | synaptotagmin-like 2                                                                                   |
| 64766  | S100PBP   | S100P binding protein                                                                                  |
| 60492  | CCDC90B   | coiled-coil domain containing 90B                                                                      |
| 3638   | INSIG1    | insulin induced gene 1                                                                                 |
| 23165  | NUP205    | nucleoporin 205kDa                                                                                     |
| 10947  | AP3M2     | adaptor-related protein complex 3, mu 2 subunit                                                        |
| 6920   | TCEA3     | transcription elongation factor A (SII), 3                                                             |
| 51477  | ISYNA1    | inositol-3-phosphate synthase 1                                                                        |
| 3921   | RPSA      | ribosomal protein SA                                                                                   |
| 5993   | RFX5      | regulatory factor X, 5 (influences HLA class II expression)                                            |
| 81539  | SLC38A1   | solute carrier family 38, member 1                                                                     |
| 118433 | RPL23AP7  | ribosomal protein L23a pseudogene 7                                                                    |
| 6235   | RPS29     | ribosomal protein S29                                                                                  |
| 134    | ADORA1    | adenosine A1 receptor                                                                                  |
| 54908  | CCDC99    | coiled-coil domain containing 99                                                                       |
| 4723   | NDUFB1    | NADH dehydrogenase (ubiquinone) flavoprotein 1, 51kDa                                                  |
| 253769 | WDR27     | WD repeat domain 27                                                                                    |
| 55214  | LEPREL1   | leprecan-like 1                                                                                        |
| 493861 | EID3      | EP300 interacting inhibitor of differentiation 3                                                       |
| 79829  | NAA40     | N(alpha)-acetyltransferase 40, NatD catalytic subunit, homolog (S. cerevisiae)                         |
| 51602  | NOP58     | NOP58 ribonucleoprotein homolog (yeast)                                                                |
| 1595   | CYP51A1   | cytochrome P450, family 51, subfamily A, polypeptide 1                                                 |
| 5319   | PLA2G1B   | phospholipase A2, group 1B (pancreas)                                                                  |
| 11332  | ACOT7     | acyl-CoA thioesterase 7                                                                                |
| 55915  | LANCL2    | LanC lantibiotic synthetase component C-like 2 (bacterial)                                             |
| 201134 | CCDC46    | coiled-coil domain containing 46                                                                       |
| 60489  | APOBEC3G  | apolipoprotein B mRNA editing enzyme, catalytic polypeptide-like 3G                                    |
| 11224  | RPL35     | ribosomal protein L35                                                                                  |
| 6158   | RPL28     | ribosomal protein L28                                                                                  |
| 56478  | EIF4ENF1  | eukaryotic translation initiation factor 4E nuclear import factor 1                                    |
| 10755  | GIPC1     | GIPC PDZ domain containing family, member 1                                                            |
| 1933   | EEF1B2    | eukaryotic translation elongation factor 1 beta 2                                                      |
| 7405   | UVRAG     | UV radiation resistance associated gene                                                                |
| 8706   | B3GALNT1  | beta-1,3-N-acetylgalactosaminyltransferase 1 (globoside blood group)                                   |
| 2995   | GYPC      | glycophorin C (Gerbich blood group)                                                                    |
| 10589  | DRAP1     | DR1-associated protein 1 (negative cofactor 2 alpha)                                                   |
| 4818   | NKG7      | natural killer cell group 7 sequence                                                                   |
| 7283   | TUBG1     | tubulin, gamma 1                                                                                       |
| 2675   | GFRA2     | GDNF family receptor alpha 2                                                                           |
| 23098  | SARM1     | sterile alpha and TIR motif containing 1                                                               |
| 6136   | RPL12     | ribosomal protein L12                                                                                  |
| 57475  | PLEKHH1   | pleckstrin homology domain containing, family H (with MyTH4 domain) member 1                           |
| 85015  | USP45     | ubiquitin specific peptidase 45                                                                        |
| 11279  | KLF8      | Kruppel-like factor 8                                                                                  |
| 129293 | C2orf89   | chromosome 2 open reading frame 89                                                                     |
| 6232   | RPS27     | ribosomal protein S27                                                                                  |
| 23555  | TSPAN15   | tetraspanin 15                                                                                         |
| 51692  | CPSF3     | cleavage and polyadenylation specific factor 3, 73kDa                                                  |
| 9497   | SLC4A7    | solute carrier family 4, sodium bicarbonate cotransporter, member 7                                    |
| 54806  | AHL1      | Abelson helper integration site 1                                                                      |
| 388574 | FLJ43681  | ribosomal protein L23a pseudogene                                                                      |
| 6335   | SCN9A     | sodium channel, voltage-gated, type IX, alpha subunit                                                  |
| 9249   | DHRS3     | dehydrogenase/reductase (SDR family) member 3                                                          |
| 54733  | SLC35F2   | solute carrier family 35, member F2                                                                    |
| 26003  | GORASP2   | golgi reassembly stacking protein 2, 55kDa                                                             |
| 677838 | SNORA61   | small nucleolar RNA, H/ACA box 61                                                                      |
| 121268 | RHEBL1    | Ras homolog enriched in brain like 1                                                                   |
| 5424   | POLD1     | polymerase (DNA directed), delta 1, catalytic subunit 125kDa                                           |
| 3925   | STMN1     | stathmin 1                                                                                             |
| 898    | CCNE1     | cyclin E1                                                                                              |
| 644511 | RPL13AP6  | ribosomal protein L13a pseudogene 6                                                                    |
| 57026  | PDXP      | pyridoxal (pyridoxine, vitamin B6) phosphatase                                                         |
| 4145   | MATK      | megakaryocyte-associated tyrosine kinase                                                               |
| 220930 | LOC220930 | hypothetical LOC220930                                                                                 |
| 79864  | C11orf63  | chromosome 11 open reading frame 63                                                                    |
| 6904   | TBCD      | tubulin folding cofactor D                                                                             |
| 26228  | STAP1     | signal transducing adaptor family member 1                                                             |
| 4175   | MCM6      | minichromosome maintenance complex component 6                                                         |
| 971    | CD72      | CD72 molecule                                                                                          |
| 283491 | OR7E156P  | olfactory receptor, family 7, subfamily E, member 156 pseudogene                                       |

|        |            |                                                                                                                  |
|--------|------------|------------------------------------------------------------------------------------------------------------------|
| 10743  | RAI1       | retinoic acid induced 1                                                                                          |
| 4047   | LSS        | lanosterol synthase (2,3-oxidosqualene-lanosterol cyclase)                                                       |
| 79697  | C14orf169  | chromosome 14 open reading frame 169                                                                             |
| 4642   | MYO1D      | myosin ID                                                                                                        |
| 8622   | PDE8B      | phosphodiesterase 8B                                                                                             |
| 8481   | OFD1       | oral-facial-digital syndrome 1                                                                                   |
| 60     | ACTB       | actin, beta                                                                                                      |
| 55526  | DHTKD1     | dehydrogenase E1 and transketolase domain containing 1                                                           |
| 6717   | SRI        | sorcini                                                                                                          |
| 2788   | GNG7       | guanine nucleotide binding protein (G protein), gamma 7                                                          |
| 476    | ATP1A1     | ATPase, Na <sup>+</sup> /K <sup>+</sup> transporting, alpha 1 polypeptide                                        |
| 1235   | CCR6       | chemokine (C-C motif) receptor 6                                                                                 |
| 79705  | LRRK1      | leucine-rich repeat kinase 1                                                                                     |
| 57493  | HEG1       | HEG homolog 1 (zebrafish)                                                                                        |
| 6389   | SDHA       | succinate dehydrogenase complex, subunit A, flavoprotein (Fp)                                                    |
| 6484   | ST3GAL4    | ST3 beta-galactoside alpha-2,3-sialyltransferase 4                                                               |
| 79856  | SNX22      | sorting nexin 22                                                                                                 |
| 23264  | ZC3H7B     | zinc finger CCCH-type containing 7B                                                                              |
| 221188 | GPR114     | G protein-coupled receptor 114                                                                                   |
| 801    | CALM1      | calmodulin 1 (phosphorylase kinase, delta)                                                                       |
| 63910  | SLC17A9    | solute carrier family 17, member 9                                                                               |
| 29919  | C18orf8    | chromosome 18 open reading frame 8                                                                               |
| 23046  | KIF21B     | kinesin family member 21B                                                                                        |
| 84617  | TUBB6      | tubulin, beta 6                                                                                                  |
| 5475   | PPEF1      | protein phosphatase, EF-hand calcium binding domain 1                                                            |
| 81571  | NCRNA00287 | non-protein coding RNA 287                                                                                       |
| 28969  | BZW2       | basic leucine zipper and W2 domains 2                                                                            |
| 25873  | RPL36      | ribosomal protein L36                                                                                            |
| 25994  | HIGD1A     | HIG1 hypoxia inducible domain family, member 1A                                                                  |
| 57121  | LPAR5      | lysophosphatidic acid receptor 5                                                                                 |
| 1633   | DCK        | deoxycytidine kinase                                                                                             |
| 57037  | ANKMY2     | ankyrin repeat and MYND domain containing 2                                                                      |
| 51559  | NT5DC3     | 5'-nucleotidase domain containing 3                                                                              |
| 149018 | LELP1      | late cornified envelope-like proline-rich 1                                                                      |
| 55624  | POMGNT1    | protein O-linked mannose beta1,2-N-acetylglucosaminyltransferase                                                 |
| 3006   | HIST1H1C   | histone cluster 1, H1c                                                                                           |
| 4065   | LY75       | lymphocyte antigen 75                                                                                            |
| 80127  | C14orf45   | chromosome 14 open reading frame 45                                                                              |
| 23390  | ZDHHC17    | zinc finger, DHHC-type containing 17                                                                             |
| 1803   | DPP4       | dipeptidyl-peptidase 4                                                                                           |
| 5335   | PLCG1      | phospholipase C, gamma 1                                                                                         |
| 6122   | RPL3       | ribosomal protein L3                                                                                             |
| 150946 | FAM59B     | family with sequence similarity 59, member B                                                                     |
| 158056 | MAMDC4     | MAM domain containing 4                                                                                          |
| 79085  | SLC25A23   | solute carrier family 25 (mitochondrial carrier; phosphate carrier), member 23                                   |
| 51655  | RASD1      | RAS, dexamethasone-induced 1                                                                                     |
| 64798  | DEPTOR     | DEP domain containing MTOR-interacting protein                                                                   |
| 343477 | HSP90B3P   | heat shock protein 90kDa beta (Grp94), member 3 (pseudogene)                                                     |
| 27143  | KIAA1274   | KIAA1274                                                                                                         |
| 29760  | BLNK       | B-cell linker                                                                                                    |
| 4239   | MFAP4      | microfibrillar-associated protein 4                                                                              |
| 8644   | AKR1C3     | aldo-keto reductase family 1, member C3 (3-alpha hydroxysteroid dehydrogenase, type II)                          |
| 653125 | LOC653125  | Golgin subfamily A member 8-like protein 1-like                                                                  |
| 152559 | PAQR3      | progesterin and adipoQ receptor family member III                                                                |
| 5478   | PPIA       | peptidylprolyl isomerase A (cyclophilin A)                                                                       |
| 25904  | CNOT10     | CCR4-NOT transcription complex, subunit 10                                                                       |
| 23649  | POLA2      | polymerase (DNA directed), alpha 2 (70kD subunit)                                                                |
| 3338   | DNAJC4     | DnaJ (Hsp40) homolog, subfamily C, member 4                                                                      |
| 285268 | ZNF621     | zinc finger protein 621                                                                                          |
| 55266  | TMEM19     | transmembrane protein 19                                                                                         |
| 51678  | MPP6       | membrane protein, palmitoylated 6 (MAGUK p55 subfamily member 6)                                                 |
| 165055 | CCDC138    | coiled-coil domain containing 138                                                                                |
| 5333   | PLCD1      | phospholipase C, delta 1                                                                                         |
| 10505  | SEMA4F     | sema domain, immunoglobulin domain (Ig), transmembrane domain (TM) and short cytoplasmic domain, (semaphorin) 4F |
| 10627  | MYL12A     | myosin, light chain 12A, regulatory, non-sarcomeric                                                              |
| 55897  | MESP1      | mesoderm posterior 1 homolog (mouse)                                                                             |
| 51339  | DACT1      | dapper, antagonist of beta-catenin, homolog 1 (Xenopus laevis)                                                   |
| 728743 | LOC728743  | similar to GLI-Kruppel family member HKR1                                                                        |
| 80115  | BAIAP2L2   | BAI1-associated protein 2-like 2                                                                                 |
| 81606  | LBH        | limb bud and heart development homolog (mouse)                                                                   |
| 92922  | CCDC102A   | coiled-coil domain containing 102A                                                                               |
| 115290 | FBXO17     | F-box protein 17                                                                                                 |
| 9214   | FAIM3      | Fas apoptotic inhibitory molecule 3                                                                              |
| 7976   | FZD3       | frizzled homolog 3 (Drosophila)                                                                                  |
| 55353  | LAPTM4B    | lysosomal protein transmembrane 4 beta                                                                           |
| 7915   | ALDH5A1    | aldehyde dehydrogenase 5 family, member A1                                                                       |
| 57576  | KIF17      | kinesin family member 17                                                                                         |
| 145508 | C14orf145  | chromosome 14 open reading frame 145                                                                             |
| 3815   | KIT        | v-kit Hardy-Zuckerman 4 feline sarcoma viral oncogene homolog                                                    |
| 387882 | C12orf75   | chromosome 12 open reading frame 75                                                                              |
| 51474  | LIMA1      | LIM domain and actin binding 1                                                                                   |
| 54549  | SDK2       | sidekick homolog 2 (chicken)                                                                                     |
| 712    | C1QA       | complement component 1, q subcomponent, A chain                                                                  |
| 10666  | CD226      | CD226 molecule                                                                                                   |
| 399665 | FAM102A    | family with sequence similarity 102, member A                                                                    |
| 51268  | PIPOX      | pipecolic acid oxidase                                                                                           |
| 9806   | SPOCK2     | sparc/osteonectin, cwcv and kazal-like domains proteoglycan (testican) 2                                         |
| 253827 | MSRB3      | methionine sulfoxide reductase B3                                                                                |
| 587    | BCAT2      | branched chain amino-acid transaminase 2, mitochondrial                                                          |
| 157769 | FAM91A1    | family with sequence similarity 91, member A1                                                                    |
| 84433  | CARD11     | caspase recruitment domain family, member 11                                                                     |
| 53834  | FGFRL1     | fibroblast growth factor receptor-like 1                                                                         |
| 1601   | DAB2       | disabled homolog 2, mitogen-responsive phosphoprotein (Drosophila)                                               |
| 90060  | CCDC120    | coiled-coil domain containing 120                                                                                |
| 55964  | SEPT3      | septin 3                                                                                                         |

|           |              |                                                                                                             |
|-----------|--------------|-------------------------------------------------------------------------------------------------------------|
| 4041      | LRP5         | low density lipoprotein receptor-related protein 5                                                          |
| 5159      | PDGFRB       | platelet-derived growth factor receptor, beta polypeptide                                                   |
| 79172     | CENPO        | centromere protein O                                                                                        |
| 3386      | ICAM4        | intercellular adhesion molecule 4 (Landsteiner-Wiener blood group)                                          |
| 2781      | GNAZ         | guanine nucleotide binding protein (G protein), alpha z polypeptide                                         |
| 55342     | STRBP        | spermatid perinuclear RNA binding protein                                                                   |
| 1906      | EDN1         | endothelin 1                                                                                                |
| 55083     | KIF26B       | kinesin family member 26B                                                                                   |
| 151888    | BTLA         | B and T lymphocyte associated                                                                               |
| 999       | CDH1         | cadherin 1, type 1, E-cadherin (epithelial)                                                                 |
| 3775      | KCNK1        | potassium channel, subfamily K, member 1                                                                    |
| 344148    | NCKAP5       | NCK-associated protein 5                                                                                    |
| 6242      | RTKN         | rhotekin                                                                                                    |
| 114899    | C1QTNF3      | C1q and tumor necrosis factor related protein 3                                                             |
| 921       | CD5          | CD5 molecule                                                                                                |
| 5754      | PTK7         | PTK7 protein tyrosine kinase 7                                                                              |
| 5168      | ENPP2        | ectonucleotide pyrophosphatase/phosphodiesterase 2                                                          |
| 4099      | MAG          | myelin associated glycoprotein                                                                              |
| 28978     | TMEM14A      | transmembrane protein 14A                                                                                   |
| 2273      | FHL1         | four and a half LIM domains 1                                                                               |
| 5624      | PROC         | protein C (inactivator of coagulation factors Va and VIIIa)                                                 |
| 55615     | PRR5         | proline rich 5 (renal)                                                                                      |
| 7098      | TLR3         | toll-like receptor 3                                                                                        |
| 2199      | FBLN2        | fibulin 2                                                                                                   |
| 121053    | C12orf45     | chromosome 12 open reading frame 45                                                                         |
| 8506      | CNTNAP1      | contactin associated protein 1                                                                              |
| 5151      | PDE8A        | phosphodiesterase 8A                                                                                        |
| 2100      | ESR2         | estrogen receptor 2 (ER beta)                                                                               |
| 2833      | CXCR3        | chemokine (C-X-C motif) receptor 3                                                                          |
| 27090     | ST6GALNAC4   | ST6 (alpha-N-acetyl-neuraminy-2,3-beta-galactosyl-1,3)-N-acetylglactosaminide alpha-2,6-sialyltransferase 4 |
| 257144    | GCET2        | germinal center expressed transcript 2                                                                      |
| 50649     | ARHGEF4      | Rho guanine nucleotide exchange factor (GEF) 4                                                              |
| 3800      | KIF5C        | kinesin family member 5C                                                                                    |
| 9957      | HS3ST1       | heparan sulfate (glucosamine) 3-O-sulfotransferase 1                                                        |
| 494513    | DFNB59       | deafness, autosomal recessive 59                                                                            |
| 9892      | SNAP91       | synaptosomal-associated protein, 91kDa homolog (mouse)                                                      |
| 84707     | BEX2         | brain expressed X-linked 2                                                                                  |
| 4629      | MYH11        | myosin, heavy chain 11, smooth muscle                                                                       |
| 400508    | NCRNA00169   | non-protein coding RNA 169                                                                                  |
| 85358     | SHANK3       | SH3 and multiple ankyrin repeat domains 3                                                                   |
| 57211     | GPR126       | G protein-coupled receptor 126                                                                              |
| 10253     | SPRY2        | sprouty homolog 2 (Drosophila)                                                                              |
| 3002      | GZMB         | granzyme B (granzyme 2, cytotoxic T-lymphocyte-associated serine esterase 1)                                |
| 55691     | FRMD4A       | FERM domain containing 4A                                                                                   |
| 2621      | GAS6         | growth arrest-specific 6                                                                                    |
| 55384     | MEG3         | maternally expressed 3 (non-protein coding)                                                                 |
| 81552     | VOPP1        | vesicular, overexpressed in cancer, prosurvival protein 1                                                   |
| 5519      | PPP2R1B      | protein phosphatase 2, regulatory subunit A, beta                                                           |
| 946       | SIGLEC6      | sialic acid binding Ig-like lectin 6                                                                        |
| 282618    | IL29         | interleukin 29 (interferon, lambda 1)                                                                       |
| 3902      | LAG3         | lymphocyte-activation gene 3                                                                                |
| 440712    | C1orf186     | chromosome 1 open reading frame 186                                                                         |
| 6608      | SMO          | smoothened homolog (Drosophila)                                                                             |
| 116028    | C16orf75     | chromosome 16 open reading frame 75                                                                         |
| 83988     | NCALD        | neurocalcin delta                                                                                           |
| 51760     | SYT17        | synaptotagmin XVII                                                                                          |
| 100505501 | LOC100505501 | hypothetical LOC100505501                                                                                   |
| 219736    | STOX1        | storkhead box 1                                                                                             |
| 7169      | TPM2         | tropomyosin 2 (beta)                                                                                        |
| 445328    | ARHGEF35     | Rho guanine nucleotide exchange factor (GEF) 35                                                             |
| 991       | CDC20        | cell division cycle 20 homolog (S. cerevisiae)                                                              |
| 116238    | TLCD1        | TLC domain containing 1                                                                                     |
| 7710      | ZNF154       | zinc finger protein 154                                                                                     |
| 326342    | EMR4P        | egf-like module containing, mucin-like, hormone receptor-like 4 pseudogene                                  |
| 126669    | SHE          | Src homology 2 domain containing E                                                                          |
| 7984      | ARHGEF5      | Rho guanine nucleotide exchange factor (GEF) 5                                                              |
| 728715    | LOC728715    | ovostatin homolog 2-like                                                                                    |
| 11098     | PRSS23       | protease, serine, 23                                                                                        |
| 5539      | PPY          | pancreatic polypeptide                                                                                      |
| 57657     | HCN3         | hyperpolarization activated cyclic nucleotide-gated potassium channel 3                                     |
| 22874     | PLEKHA6      | pleckstrin homology domain containing, family A member 6                                                    |
| 9760      | TOX          | thymocyte selection-associated high mobility group box                                                      |
| 5358      | PLS3         | plastin 3                                                                                                   |
| 638       | BIK          | BCL2-interacting killer (apoptosis-inducing)                                                                |
| 84660     | CCDC62       | coiled-coil domain containing 62                                                                            |
| 55653     | BCAS4        | breast carcinoma amplified sequence 4                                                                       |
| 23242     | COBL         | cordon-bleu homolog (mouse)                                                                                 |
| 55086     | CXorf57      | chromosome X open reading frame 57                                                                          |
| 79656     | BEND5        | BEN domain containing 5                                                                                     |
| 1815      | DRD4         | dopamine receptor D4                                                                                        |
| 57447     | NDRG2        | NDRG family member 2                                                                                        |
| 9963      | SLC23A1      | solute carrier family 23 (nucleobase transporters), member 1                                                |
| 100505650 | LOC100505650 | hypothetical LOC100505650                                                                                   |
| 219902    | TMEM136      | transmembrane protein 136                                                                                   |
| 79007     | DBNDD1       | dysbindin (dystrobrevin binding protein 1) domain containing 1                                              |
| 3741      | KCNA5        | potassium voltage-gated channel, shaker-related subfamily, member 5                                         |
| 152485    | ZNF827       | zinc finger protein 827                                                                                     |
| 91319     | DERL3        | Der1-like domain family, member 3                                                                           |
| 54836     | BSPRY        | B-box and SPRY domain containing                                                                            |
| 1000      | CDH2         | cadherin 2, type 1, N-cadherin (neuronal)                                                                   |
| 389816    | LRRRC26      | leucine rich repeat containing 26                                                                           |
| 5129      | CDK18        | cyclin-dependent kinase 18                                                                                  |
| 3852      | KRT5         | keratin 5                                                                                                   |
| 116159    | CYYR1        | cysteine/tyrosine-rich 1                                                                                    |
| 434       | ASIP         | agouti signaling protein                                                                                    |

|        |        |                                                                                           |
|--------|--------|-------------------------------------------------------------------------------------------|
| 113451 | ADC    | arginine decarboxylase                                                                    |
| 51237  | MZB1   | marginal zone B and B1 cell-specific protein                                              |
| 3512   | IGJ    | immunoglobulin J polypeptide, linker protein for immunoglobulin alpha and mu polypeptides |
| 5730   | PTGDS  | prostaglandin D2 synthase 21kDa (brain)                                                   |
| 80326  | WNT10A | wingless-type MMTV integration site family, member 10A                                    |
| 23189  | KANK1  | KN motif and ankyrin repeat domains 1                                                     |
| 54106  | TLR9   | toll-like receptor 9                                                                      |
| 163702 | IL28RA | interleukin 28 receptor, alpha (interferon, lambda receptor)                              |
| 2047   | EPHB1  | EPH receptor B1                                                                           |
| 153769 | SH3RF2 | SH3 domain containing ring finger 2                                                       |

### CD16+ monocytes (upregulated genes)

| ENTREZ ID | Gene Symbol  | Gene Name                                                                                    |
|-----------|--------------|----------------------------------------------------------------------------------------------|
| 719       | C3AR1        | complement component 3a receptor 1                                                           |
| 6556      | SLC11A1      | solute carrier family 11 (proton-coupled divalent metal ion transporters), member 1          |
| 943       | TNFRSF8      | tumor necrosis factor receptor superfamily, member 8                                         |
| 58475     | MS4A7        | membrane-spanning 4-domains, subfamily A, member 7                                           |
| 838       | CASP5        | caspase 5, apoptosis-related cysteine peptidase                                              |
| 113791    | PIK3IP1      | phosphoinositide-3-kinase interacting protein 1                                              |
| 5326      | PLAGL2       | pleiomorphic adenoma gene-like 2                                                             |
| 9935      | MAFB         | v-maf musculoaponeurotic fibrosarcoma oncogene homolog B (avian)                             |
| 3800      | KIF5C        | kinesin family member 5C                                                                     |
| 3386      | ICAM4        | intercellular adhesion molecule 4 (Landsteiner-Wiener blood group)                           |
| 8714      | ABCC3        | ATP-binding cassette, sub-family C (CFTR/MRP), member 3                                      |
| 83541     | FAM110A      | family with sequence similarity 110, member A                                                |
| 2592      | GALT         | galactose-1-phosphate uridylyltransferase                                                    |
| 83931     | STK40        | serine/threonine kinase 40                                                                   |
| 5908      | RAP1B        | RAP1B, member of RAS oncogene family                                                         |
| 51274     | KLF3         | Kruppel-like factor 3 (basic)                                                                |
| 255919    | TMEM188      | transmembrane protein 188                                                                    |
| 10924     | SMPDL3A      | sphingomyelin phosphodiesterase, acid-like 3A                                                |
| 147699    | PPM1N        | protein phosphatase, Mg <sup>2+</sup> /Mn <sup>2+</sup> dependent, 1N (putative)             |
| 8863      | PER3         | period homolog 3 (Drosophila)                                                                |
| 29948     | OSGIN1       | oxidative stress induced growth inhibitor 1                                                  |
| 8932      | MBD2         | methyl-CpG binding domain protein 2                                                          |
| 6237      | RRAS         | related RAS viral (r-ras) oncogene homolog                                                   |
| 51092     | SIDT2        | SID1 transmembrane family, member 2                                                          |
| 83593     | RASSF5       | Ras association (RalGDS/AF-6) domain family member 5                                         |
| 27106     | ARRDC2       | arrestin domain containing 2                                                                 |
| 161742    | SPRED1       | sprouty-related, EVH1 domain containing 1                                                    |
| 5783      | PTPN13       | protein tyrosine phosphatase, non-receptor type 13 (APO-1/CD95 (Fas)-associated phosphatase) |
| 29097     | CNIH4        | cornichon homolog 4 (Drosophila)                                                             |
| 6840      | SVIL         | supervillin                                                                                  |
| 23098     | SARM1        | sterile alpha and TIR motif containing 1                                                     |
| 55145     | THAP1        | THAP domain containing, apoptosis associated protein 1                                       |
| 64411     | ARAP3        | ArfGAP with RhoGAP domain, ankyrin repeat and PH domain 3                                    |
| 8519      | IFITM1       | interferon induced transmembrane protein 1 (9-27)                                            |
| 159162    | RBMY2FP      | RNA binding motif protein, Y-linked, family 2, member F pseudogene                           |
| 55615     | PRR5         | proline rich 5 (renal)                                                                       |
| 116372    | LYPD1        | LY6/PLAUR domain containing 1                                                                |
| 53834     | FGFRL1       | fibroblast growth factor receptor-like 1                                                     |
| 84957     | RELT         | RELT tumor necrosis factor receptor                                                          |
| 10589     | DRAP1        | DR1-associated protein 1 (negative cofactor 2 alpha)                                         |
| 2192      | FBLN1        | fibulin 1                                                                                    |
| 22821     | RASA3        | RAS p21 protein activator 3                                                                  |
| 51760     | SYT17        | synaptotagmin XVII                                                                           |
| 898       | CCNE1        | cyclin E1                                                                                    |
| 55384     | MEG3         | maternally expressed 3 (non-protein coding)                                                  |
| 57659     | ZBTB4        | zinc finger and BTB domain containing 4                                                      |
| 3422      | IDI1         | isopentenyl-diphosphate delta isomerase 1                                                    |
| 693159    | MIR574       | microRNA 574                                                                                 |
| 3638      | INSIG1       | insulin induced gene 1                                                                       |
| 171586    | ABHD3        | abhydrolase domain containing 3                                                              |
| 29979     | UBQLN1       | ubiquilin 1                                                                                  |
| 4061      | LY6E         | lymphocyte antigen 6 complex, locus E                                                        |
| 80139     | ZNF703       | zinc finger protein 703                                                                      |
| 79412     | KREMEN2      | kringle containing transmembrane protein 2                                                   |
| 100130557 | LOC100130557 | hypothetical LOC100130557                                                                    |
| 7408      | VASP         | vasodilator-stimulated phosphoprotein                                                        |
| 55143     | CDCA8        | cell division cycle associated 8                                                             |
| 1488      | CTBP2        | C-terminal binding protein 2                                                                 |
| 84689     | MS4A14       | membrane-spanning 4-domains, subfamily A, member 14                                          |
| 1534      | CYB5B1       | cytochrome b-5b1                                                                             |
| 5585      | PKN1         | protein kinase N1                                                                            |
| 100128059 | LOC100128059 | hypothetical LOC100128059                                                                    |
| 57010     | CABP4        | calcium binding protein 4                                                                    |
| 4239      | MFAP4        | microfibrillar-associated protein 4                                                          |
| 100132967 | NCRNA00204   | non-protein coding RNA 204                                                                   |
| 8520      | HAT1         | histone acetyltransferase 1                                                                  |
| 55723     | ASF1B        | ASF1 anti-silencing function 1 homolog B (S. cerevisiae)                                     |
| 125206    | SLC5A10      | solute carrier family 5 (sodium/glucose cotransporter), member 10                            |
| 643418    | LIPN         | lipase, family member N                                                                      |
| 57182     | ANKRD50      | ankyrin repeat domain 50                                                                     |
| 6674      | SPAG1        | sperm associated antigen 1                                                                   |
| 5064      | PALM         | paralemmin                                                                                   |
| 9213      | XPR1         | xenotropic and polytropic retrovirus receptor 1                                              |
| 23552     | CDK20        | cyclin-dependent kinase 20                                                                   |
| 7320      | UBE2B        | ubiquitin-conjugating enzyme E2B (RAD6 homolog)                                              |
| 57493     | HEG1         | HEG homolog 1 (zebrafish)                                                                    |
| 25771     | TBC1D22A     | TBC1 domain family, member 22A                                                               |
| 4067      | LYN          | v-yes-1 Yamaguchi sarcoma viral related oncogene homolog                                     |
| 57804     | POLD4        | polymerase (DNA-directed), delta 4                                                           |
| 7764      | ZNF217       | zinc finger protein 217                                                                      |
| 22808     | MIRAS        | muscle RAS oncogene homolog                                                                  |
| 6904      | TBCD         | tubulin folding cofactor D                                                                   |



|           |              |                                                                                              |
|-----------|--------------|----------------------------------------------------------------------------------------------|
| 3688      | ITGB1        | integrin, beta 1 (fibronectin receptor, beta polypeptide, antigen CD29 includes MDF2, MSK12) |
| 29919     | C18orf8      | chromosome 18 open reading frame 8                                                           |
| 388       | RHOB         | ras homolog gene family, member B                                                            |
| 55788     | LMBRD1       | LMBR1 domain containing 1                                                                    |
| 7367      | UGT2B17      | UDP glucuronosyltransferase 2 family, polypeptide B17                                        |
| 3759      | KCNJ2        | potassium inwardly-rectifying channel, subfamily J, member 2                                 |
| 79605     | PGBD5        | piggyBac transposable element derived 5                                                      |
| 5606      | MAP2K3       | mitogen-activated protein kinase kinase 3                                                    |
| 404636    | FAM45A       | family with sequence similarity 45, member A                                                 |
| 50651     | SLC45A1      | solute carrier family 45, member 1                                                           |
| 6813      | STXBP2       | syntaxin binding protein 2                                                                   |
| 116985    | ARAP1        | ArfGAP with RhoGAP domain, ankyrin repeat and PH domain 1                                    |
| 7099      | TLR4         | toll-like receptor 4                                                                         |
| 23508     | TTC9         | tetratricopeptide repeat domain 9                                                            |
| 23046     | KIF21B       | kinesin family member 21B                                                                    |
| 9821      | RB1CC1       | RB1-inducible coiled-coil 1                                                                  |
| 3707      | ITPKB        | inositol 1,4,5-trisphosphate 3-kinase B                                                      |
| 2001      | ELF5         | E74-like factor 5 (ets domain transcription factor)                                          |
| 10916     | MAGED2       | melanoma antigen family D, 2                                                                 |
| 84926     | SPRYD3       | SPRY domain containing 3                                                                     |
| 6253      | RTN2         | reticulon 2                                                                                  |
| 162989    | DEDD2        | death effector domain containing 2                                                           |
| 4772      | NFATC1       | nuclear factor of activated T-cells, cytoplasmic, calcineurin-dependent 1                    |
| 90362     | FAM110B      | family with sequence similarity 110, member B                                                |
| 6576      | SLC25A1      | solute carrier family 25 (mitochondrial carrier; citrate transporter), member 1              |
| 221981    | THSD7A       | thrombospondin, type I, domain containing 7A                                                 |
| 4651      | MYO10        | myosin X                                                                                     |
| 197257    | LDHD         | lactate dehydrogenase D                                                                      |
| 100131607 | LOC100131607 | hypothetical LOC100131607                                                                    |
| 79065     | ATG9A        | ATG9 autophagy related 9 homolog A ( <i>S. cerevisiae</i> )                                  |
| 51527     | C14orf129    | chromosome 14 open reading frame 129                                                         |
| 23338     | PHF15        | PHD finger protein 15                                                                        |
| 80194     | TMEM134      | transmembrane protein 134                                                                    |
| 100507321 | LOC100507321 | hypothetical LOC100507321                                                                    |
| 408       | ARRB1        | arrestin, beta 1                                                                             |
| 51155     | HN1          | hematological and neurological expressed 1                                                   |
| 2983      | GUCY1B3      | guanylate cyclase 1, soluble, beta 3                                                         |
| 246330    | PELI3        | pellino homolog 3 ( <i>Drosophila</i> )                                                      |
| 157       | ADRBK2       | adrenergic, beta, receptor kinase 2                                                          |
| 246175    | CNOT6L       | CCR4-NOT transcription complex, subunit 6-like                                               |
| 1906      | EDN1         | endothelin 1                                                                                 |
| 27202     | GPR77        | G protein-coupled receptor 77                                                                |
| 57826     | RAP2C        | RAP2C, member of RAS oncogene family                                                         |
| 10581     | IFITM2       | interferon induced transmembrane protein 2 (1-8D)                                            |
| 717       | C2           | complement component 2                                                                       |
| 4673      | NAP1L1       | nucleosome assembly protein 1-like 1                                                         |
| 1163      | CKS1B        | CDC28 protein kinase regulatory subunit 1B                                                   |
| 6647      | SOD1         | superoxide dismutase 1, soluble                                                              |
| 353514    | LILRA5       | leukocyte immunoglobulin-like receptor, subfamily A (with TM domain), member 5               |
| 93323     | HAUS8        | HAUS augmin-like complex, subunit 8                                                          |
| 9537      | TP53I11      | tumor protein p53 inducible protein 11                                                       |
| 151556    | GPR155       | G protein-coupled receptor 155                                                               |
| 51280     | GOLM1        | golgi membrane protein 1                                                                     |
| 54453     | RIN2         | Ras and Rab interactor 2                                                                     |
| 585       | BBS4         | Bardet-Biedl syndrome 4                                                                      |
| 22919     | MAPRE1       | microtubule-associated protein, RP/EB family, member 1                                       |
| 833       | CARS         | cysteinyl-tRNA synthetase                                                                    |
| 2633      | GBP1         | guanylate binding protein 1, interferon-inducible                                            |
| 8622      | PDE8B        | phosphodiesterase 8B                                                                         |
| 9975      | NR1D2        | nuclear receptor subfamily 1, group D, member 2                                              |
| 56181     | FAM54B       | family with sequence similarity 54, member B                                                 |
| 201627    | FAM116A      | family with sequence similarity 116, member A                                                |
| 6102      | RP2          | retinitis pigmentosa 2 (X-linked recessive)                                                  |
| 4883      | NPR3         | natriuretic peptide receptor C/guanylate cyclase C (atrionatriuretic peptide receptor C)     |
| 28966     | SNX24        | sorting nexin 24                                                                             |
| 83693     | HSDL1        | hydroxysteroid dehydrogenase like 1                                                          |
| 3455      | IFNAR2       | interferon (alpha, beta and omega) receptor 2                                                |
| 10461     | MERTK        | c-mer proto-oncogene tyrosine kinase                                                         |
| 79154     | DHRS11       | dehydrogenase/reductase (SDR family) member 11                                               |
| 1486      | CTBS         | chitinase, di-N-acetyl-                                                                      |
| 388182    | FLJ42289     | hypothetical LOC388182                                                                       |
| 527       | ATP6V0C      | ATPase, H+ transporting, lysosomal 16kDa, V0 subunit c                                       |
| 8915      | BCL10        | B-cell CLL/lymphoma 10                                                                       |
| 11182     | SLC2A6       | solute carrier family 2 (facilitated glucose transporter), member 6                          |
| 54622     | ARL15        | ADP-ribosylation factor-like 15                                                              |
| 56894     | AGPAT3       | 1-acylglycerol-3-phosphate O-acyltransferase 3                                               |
| 79148     | MMP28        | matrix metalloproteinase 28                                                                  |
| 53        | ACP2         | acid phosphatase 2, lysosomal                                                                |
| 29992     | PILRA        | paired immunoglobulin-like type 2 receptor alpha                                             |
| 51311     | TLR8         | toll-like receptor 8                                                                         |
| 6398      | SECTM1       | secreted and transmembrane 1                                                                 |
| 79852     | EPHX3        | epoxide hydrolase 3                                                                          |
| 7752      | ZNF200       | zinc finger protein 200                                                                      |
| 4744      | NEFH         | neurofilament, heavy polypeptide                                                             |
| 55055     | ZWILCH       | Zwilch, kinetochore associated, homolog ( <i>Drosophila</i> )                                |
| 23328     | SASH1        | SAM and SH3 domain containing 1                                                              |
| 54458     | PRR13        | proline rich 13                                                                              |
| 5165      | PDK3         | pyruvate dehydrogenase kinase, isozyme 3                                                     |
| 10154     | PLXNC1       | plexin C1                                                                                    |
| 6655      | SOS2         | son of sevenless homolog 2 ( <i>Drosophila</i> )                                             |
| 55344     | PLCXD1       | phosphatidylinositol-specific phospholipase C, X domain containing 1                         |
| 57192     | MCOLN1       | mucopolipin 1                                                                                |
| 10890     | RAB10        | RAB10, member RAS oncogene family                                                            |
| 149951    | COMM7        | COMM domain containing 7                                                                     |
| 2869      | GRK5         | G protein-coupled receptor kinase 5                                                          |

|        |            |                                                                                          |
|--------|------------|------------------------------------------------------------------------------------------|
| 23469  | PHF3       | PHD finger protein 3                                                                     |
| 26136  | TES        | testis derived transcript (3 LIM domains)                                                |
| 10312  | TCIRG1     | T-cell, immune regulator 1, ATPase, H <sup>+</sup> transporting, lysosomal V0 subunit A3 |
| 90007  | MIDN       | midnolin                                                                                 |
| 7464   | CORO2A     | coronin, actin binding protein, 2A                                                       |
| 60682  | SMAP1      | small ArfGAP 1                                                                           |
| 5159   | PDGFRB     | platelet-derived growth factor receptor, beta polypeptide                                |
| 11156  | PTP4A3     | protein tyrosine phosphatase type IVA, member 3                                          |
| 11275  | KLHL2      | kelch-like 2, Mayven ( <i>Drosophila</i> )                                               |
| 3176   | HNMT       | histamine N-methyltransferase                                                            |
| 51765  | MST4       | serine/threonine protein kinase MST4                                                     |
| 8445   | DYRK2      | dual-specificity tyrosine-(Y)-phosphorylation regulated kinase 2                         |
| 284422 | C19orf77   | chromosome 19 open reading frame 77                                                      |
| 60492  | CCDC90B    | coiled-coil domain containing 90B                                                        |
| 54464  | XRN1       | 5'-3' exoribonuclease 1                                                                  |
| 23416  | KCNH3      | potassium voltage-gated channel, subfamily H (eag-related), member 3                     |
| 56890  | MDM1       | Mdm1 nuclear protein homolog (mouse)                                                     |
| 26118  | WSB1       | WD repeat and SOCS box containing 1                                                      |
| 64072  | CDH23      | cadherin-related 23                                                                      |
| 23315  | SLC9A8     | solute carrier family 9 (sodium/hydrogen exchanger), member 8                            |
| 27244  | SESN1      | sestrin 1                                                                                |
| 10435  | CDC42EP2   | CDC42 effector protein (Rho GTPase binding) 2                                            |
| 1050   | CEBPA      | CCAAT/enhancer binding protein (C/EBP), alpha                                            |
| 23585  | TMEM50A    | transmembrane protein 50A                                                                |
| 5222   | PGA5       | pepsinogen 5, group I (pepsinogen A)                                                     |
| 832    | CAPZB      | capping protein (actin filament) muscle Z-line, beta                                     |
| 83464  | APH1B      | anterior pharynx defective 1 homolog B ( <i>C. elegans</i> )                             |
| 81606  | LBH        | limb bud and heart development homolog (mouse)                                           |
| 6794   | STK11      | serine/threonine kinase 11                                                               |
| 441455 | LOC441455  | makorin ring finger protein 1 pseudogene                                                 |
| 60489  | APOBEC3G   | apolipoprotein B mRNA editing enzyme, catalytic polypeptide-like 3G                      |
| 4117   | MAK        | male germ cell-associated kinase                                                         |
| 4043   | LRPAP1     | low density lipoprotein receptor-related protein associated protein 1                    |
| 3489   | IGFBP6     | insulin-like growth factor binding protein 6                                             |
| 25903  | OLFML2B    | olfactomedin-like 2B                                                                     |
| 4122   | MAN2A2     | mannosidase, alpha, class 2A, member 2                                                   |
| 5732   | PTGER2     | prostaglandin E receptor 2 (subtype EP2), 53kDa                                          |
| 4012   | LNPEP      | leucyl/cystinyl aminopeptidase                                                           |
| 282974 | STK32C     | serine/threonine kinase 32C                                                              |
| 158358 | KIAA2026   | KIAA2026                                                                                 |
| 55181  | C17orf71   | chromosome 17 open reading frame 71                                                      |
| 80896  | NPL        | N-acetylneuraminate pyruvate lyase (dihydrodipicolinate synthase)                        |
| 91351  | DDX60L     | DEAD (Asp-Glu-Ala-Asp) box polypeptide 60-like                                           |
| 3978   | LIG1       | ligase I, DNA, ATP-dependent                                                             |
| 54965  | PIGX       | phosphatidylinositol glycan anchor biosynthesis, class X                                 |
| 88455  | ANKRD13A   | ankyrin repeat domain 13A                                                                |
| 84668  | FAM126A    | family with sequence similarity 126, member A                                            |
| 9474   | ATG5       | ATG5 autophagy related 5 homolog ( <i>S. cerevisiae</i> )                                |
| 112616 | CMTM7      | CKLF-like MARVEL transmembrane domain containing 7                                       |
| 718    | C3         | complement component 3                                                                   |
| 60684  | C4orf41    | chromosome 4 open reading frame 41                                                       |
| 51111  | SUV420H1   | suppressor of variegation 4-20 homolog 1 ( <i>Drosophila</i> )                           |
| 57498  | KIDINS220  | kinase D-interacting substrate, 220kDa                                                   |
| 387    | RHOA       | ras homolog gene family, member A                                                        |
| 6453   | ITSN1      | intersectin 1 (SH3 domain protein)                                                       |
| 84173  | ELMOD3     | ELMO/CED-12 domain containing 3                                                          |
| 27128  | CYTH4      | cytohesin 4                                                                              |
| 65018  | PINK1      | PTEN induced putative kinase 1                                                           |
| 10288  | LILRB2     | leukocyte immunoglobulin-like receptor, subfamily B (with TM and ITIM domains), member 2 |
| 3305   | HSPA1L     | heat shock 70kDa protein 1-like                                                          |
| 9780   | FAM38A     | family with sequence similarity 38, member A                                             |
| 8705   | B3GALT4    | UDP-Gal:betaGlcNAc beta 1,3-galactosyltransferase, polypeptide 4                         |
| 79137  | FAM134A    | family with sequence similarity 134, member A                                            |
| 8477   | GPR65      | G protein-coupled receptor 65                                                            |
| 54438  | GFOD1      | glucose-fructose oxidoreductase domain containing 1                                      |
| 79720  | VPS37B     | vacuolar protein sorting 37 homolog B ( <i>S. cerevisiae</i> )                           |
| 5265   | SERPINA1   | serpin peptidase inhibitor, clade A (alpha-1 antiproteinase, antitrypsin), member 1      |
| 200030 | NBPF11     | neuroblastoma breakpoint family, member 11                                               |
| 9119   | KRT75      | keratin 75                                                                               |
| 23167  | EFR3A      | EFR3 homolog A ( <i>S. cerevisiae</i> )                                                  |
| 283219 | KCTD21     | potassium channel tetramerisation domain containing 21                                   |
| 54507  | ADAMTSL4   | ADAMTS-like 4                                                                            |
| 1387   | CREBBP     | CREB binding protein                                                                     |
| 2550   | GABBR1     | gamma-aminobutyric acid (GABA) B receptor, 1                                             |
| 5800   | PTPRO      | protein tyrosine phosphatase, receptor type, O                                           |
| 490    | ATP2B1     | ATPase, Ca <sup>++</sup> transporting, plasma membrane 1                                 |
| 1155   | TBCB       | tubulin folding cofactor B                                                               |
| 11168  | PSIP1      | PC4 and SFRS1 interacting protein 1                                                      |
| 3660   | IRF2       | interferon regulatory factor 2                                                           |
| 712    | C1QA       | complement component 1, q subcomponent, A chain                                          |
| 11138  | TBC1D8     | TBC1 domain family, member 8 (with GRAM domain)                                          |
| 7739   | ZNF185     | zinc finger protein 185 (LIM domain)                                                     |
| 619434 | NCRNA00051 | non-protein coding RNA 51                                                                |
| 974    | CD79B      | CD79b molecule, immunoglobulin-associated beta                                           |
| 79020  | C7orf25    | chromosome 7 open reading frame 25                                                       |
| 9262   | STK17B     | serine/threonine kinase 17b                                                              |
| 139596 | UPRT       | uracil phosphoribosyltransferase (FUR1) homolog ( <i>S. cerevisiae</i> )                 |
| 1318   | SLC31A2    | solute carrier family 31 (copper transporters), member 2                                 |
| 25979  | DHRS7B     | dehydrogenase/reductase (SDR family) member 7B                                           |
| 80267  | EDEM3      | ER degradation enhancer, mannosidase alpha-like 3                                        |
| 203054 | ADCK5      | aarF domain containing kinase 5                                                          |
| 10908  | PNPLA6     | patatin-like phospholipase domain containing 6                                           |
| 80256  | KIAA1539   | KIAA1539                                                                                 |
| 994    | CDC25B     | cell division cycle 25 homolog B ( <i>S. pombe</i> )                                     |
| 348180 | CTU2       | cytosolic thiouridylase subunit 2 homolog ( <i>S. pombe</i> )                            |

|           |              |                                                                                               |
|-----------|--------------|-----------------------------------------------------------------------------------------------|
| 6778      | STAT6        | signal transducer and activator of transcription 6, interleukin-4 induced                     |
| 79168     | LILRA6       | leukocyte immunoglobulin-like receptor, subfamily A (with TM domain), member 6                |
| 5912      | RAP2B        | RAP2B, member of RAS oncogene family                                                          |
| 11213     | IRAK3        | interleukin-1 receptor-associated kinase 3                                                    |
| 56895     | AGPAT4       | 1-acylglycerol-3-phosphate O-acyltransferase 4 (lysophosphatidic acid acyltransferase, delta) |
| 2771      | GNAI2        | guanine nucleotide binding protein (G protein), alpha inhibiting activity polypeptide 2       |
| 55763     | EXOC1        | exocyst complex component 1                                                                   |
| 25977     | NECAP1       | NECAP endocytosis associated 1                                                                |
| 219855    | SLC37A2      | solute carrier family 37 (glycerol-3-phosphate transporter), member 2                         |
| 1436      | CSF1R        | colony stimulating factor 1 receptor                                                          |
| 2634      | GBP2         | guanylate binding protein 2, interferon-inducible                                             |
| 81844     | TRIM56       | tripartite motif containing 56                                                                |
| 138151    | NACC2        | NACC family member 2, BEN and BTB (POZ) domain containing                                     |
| 25798     | BRI3         | brain protein I3                                                                              |
| 6051      | RNPEP        | arginyl aminopeptidase (aminopeptidase B)                                                     |
| 23654     | PLXNB2       | plexin B2                                                                                     |
| 8869      | ST3GAL5      | ST3 beta-galactoside alpha-2,3-sialyltransferase 5                                            |
| 5987      | TRIM27       | tripartite motif containing 27                                                                |
| 6397      | SEC14L1      | SEC14-like 1 (S. cerevisiae)                                                                  |
| 134510    | UBLCP1       | ubiquitin-like domain containing CTD phosphatase 1                                            |
| 2885      | GRB2         | growth factor receptor-bound protein 2                                                        |
| 55654     | TMEM127      | transmembrane protein 127                                                                     |
| 10410     | IFITM3       | interferon induced transmembrane protein 3 (1-8U)                                             |
| 7170      | TPM3         | tropomyosin 3                                                                                 |
| 474338    | SUMO1P3      | SUMO1 pseudogene 3                                                                            |
| 643180    | CCT6P3       | chaperonin containing TCP1, subunit 6 (zeta) pseudogene 3                                     |
| 339448    | C1orf174     | chromosome 1 open reading frame 174                                                           |
| 79132     | DHX58        | DEXH (Asp-Glu-X-His) box polypeptide 58                                                       |
| 8462      | KLF11        | Kruppel-like factor 11                                                                        |
| 7060      | THBS4        | thrombospondin 4                                                                              |
| 4259      | MGST3        | microsomal glutathione S-transferase 3                                                        |
| 5140      | PDE3B        | phosphodiesterase 3B, cGMP-inhibited                                                          |
| 7732      | RNF112       | ring finger protein 112                                                                       |
| 55357     | TBC1D2       | TBC1 domain family, member 2                                                                  |
| 55008     | HERC6        | hect domain and RLD 6                                                                         |
| 80301     | PLEKHO2      | pleckstrin homology domain containing, family O member 2                                      |
| 23608     | MKRN1        | makorin ring finger protein 1                                                                 |
| 9046      | DOK2         | docking protein 2, 56kDa                                                                      |
| 3588      | IL10RB       | interleukin 10 receptor, beta                                                                 |
| 9826      | ARHGEF11     | Rho guanine nucleotide exchange factor (GEF) 11                                               |
| 10092     | ARPC5        | actin related protein 2/3 complex, subunit 5, 16kDa                                           |
| 4354      | MPP1         | membrane protein, palmitoylated 1, 55kDa                                                      |
| 8650      | NUMB         | numb homolog (Drosophila)                                                                     |
| 4277      | MICB         | MHC class I polypeptide-related sequence B                                                    |
| 27287     | VENTX        | VENT homeobox homolog (Xenopus laevis)                                                        |
| 80727     | TTYH3        | tweety homolog 3 (Drosophila)                                                                 |
| 114769    | CARD16       | caspase recruitment domain family, member 16                                                  |
| 54861     | SNRK         | SNF related kinase                                                                            |
| 57827     | C6orf47      | chromosome 6 open reading frame 47                                                            |
| 100129550 | LOC100129550 | hypothetical LOC100129550                                                                     |
| 51592     | TRIM33       | tripartite motif containing 33                                                                |
| 64114     | TMBIM1       | transmembrane BAX inhibitor motif containing 1                                                |
| 1138      | CHRNA5       | cholinergic receptor, nicotinic, alpha 5                                                      |
| 115548    | FCHO2        | FCH domain only 2                                                                             |
| 55858     | TMEM165      | transmembrane protein 165                                                                     |
| 808       | CALM3        | calmodulin 3 (phosphorylase kinase, delta)                                                    |
| 80025     | PANK2        | pantothenate kinase 2                                                                         |
| 196383    | RILPL2       | Rab interacting lysosomal protein-like 2                                                      |
| 23303     | KIF13B       | kinesin family member 13B                                                                     |
| 2526      | FUT4         | fucosyltransferase 4 (alpha (1,3) fucosyltransferase, myeloid-specific)                       |
| 5899      | RALB         | v-ral simian leukemia viral oncogene homolog B (ras related; GTP binding protein)             |
| 9470      | EIF4E2       | eukaryotic translation initiation factor 4E family member 2                                   |
| 5701      | PSMC2        | proteasome (prosome, macropain) 26S subunit, ATPase, 2                                        |
| 55454     | CSGALNACT2   | chondroitin sulfate N-acetylgalactosaminyltransferase 2                                       |
| 22863     | ATG14        | ATG14 autophagy related 14 homolog (S. cerevisiae)                                            |
| 79901     | CYBRD1       | cytochrome b reductase 1                                                                      |
| 2733      | GLE1         | GLE1 RNA export mediator homolog (yeast)                                                      |
| 2799      | GNS          | glucosamine (N-acetyl)-6-sulfatase                                                            |
| 51621     | KLF13        | Kruppel-like factor 13                                                                        |
| 9997      | SCO2         | SCO cytochrome oxidase deficient homolog 2 (yeast)                                            |
| 121457    | IKBIP        | IKBKB interacting protein                                                                     |
| 2665      | GDI2         | GDP dissociation inhibitor 2                                                                  |
| 476       | ATP1A1       | ATPase, Na <sup>+</sup> /K <sup>+</sup> transporting, alpha 1 polypeptide                     |
| 637       | BID          | BH3 interacting domain death agonist                                                          |
| 352961    | HCG26        | HLA complex group 26 (non-protein coding)                                                     |
| 54834     | GDAP2        | ganglioside induced differentiation associated protein 2                                      |
| 57590     | WDFY1        | WD repeat and FYVE domain containing 1                                                        |
| 6992      | PPP1R11      | protein phosphatase 1, regulatory (inhibitor) subunit 11                                      |
| 146923    | RUNDC1       | RUN domain containing 1                                                                       |
| 1051      | CEBPB        | CCAAT/enhancer binding protein (C/EBP), beta                                                  |
| 114826    | SMYD4        | SET and MYND domain containing 4                                                              |
| 220929    | ZNF438       | zinc finger protein 438                                                                       |
| 55521     | TRIM36       | tripartite motif containing 36                                                                |
| 341405    | ANKRD33      | ankyrin repeat domain 33                                                                      |
| 64422     | ATG3         | ATG3 autophagy related 3 homolog (S. cerevisiae)                                              |
| 4666      | NACA         | nascent polypeptide-associated complex alpha subunit                                          |
| 100287171 | WASH1        | WAS protein family homolog 1                                                                  |
| 84293     | C10orf58     | chromosome 10 open reading frame 58                                                           |
| 6195      | RPS6KA1      | ribosomal protein S6 kinase, 90kDa, polypeptide 1                                             |
| 10970     | CKAP4        | cytoskeleton-associated protein 4                                                             |
| 27348     | TOR1B        | torsin family 1, member B (torsin B)                                                          |
| 5210      | PFKFB4       | 6-phosphofructo-2-kinase/fructose-2,6-biphosphatase 4                                         |
| 83666     | PARP9        | poly (ADP-ribose) polymerase family, member 9                                                 |
| 9061      | PAPSS1       | 3'-phosphoadenosine 5'-phosphosulfate synthase 1                                              |
| 1102      | RCBTB2       | regulator of chromosome condensation (RCC1) and BTB (POZ) domain containing protein 2         |

|        |          |                                                                                          |
|--------|----------|------------------------------------------------------------------------------------------|
| 55803  | ADAP2    | ArfGAP with dual PH domains 2                                                            |
| 3098   | HK1      | hexokinase 1                                                                             |
| 968    | CD68     | CD68 molecule                                                                            |
| 256586 | LYSMD2   | LysM, putative peptidoglycan-binding, domain containing 2                                |
| 10422  | UBAC1    | UBA domain containing 1                                                                  |
| 8564   | KMO      | kynurenine 3-monooxygenase (kynurenine 3-hydroxylase)                                    |
| 8621   | CDK13    | cyclin-dependent kinase 13                                                               |
| 10096  | ACTR3    | ARP3 actin-related protein 3 homolog (yeast)                                             |
| 834    | CASP1    | caspase 1, apoptosis-related cysteine peptidase (interleukin 1, beta, convertase)        |
| 3987   | LIMS1    | LIM and senescent cell antigen-like domains 1                                            |
| 6277   | S100A6   | S100 calcium binding protein A6                                                          |
| 9839   | ZEB2     | zinc finger E-box binding homeobox 2                                                     |
| 23240  | KIAA0922 | KIAA0922                                                                                 |
| 57532  | NUFIP2   | nuclear fragile X mental retardation protein interacting protein 2                       |
| 1979   | EIF4EBP2 | eukaryotic translation initiation factor 4E binding protein 2                            |
| 5351   | PLOD1    | procollagen-lysine 1, 2-oxoglutarate 5-dioxygenase 1                                     |
| 23208  | SYT11    | synaptotagmin XI                                                                         |
| 11033  | ADAP1    | ArfGAP with dual PH domains 1                                                            |
| 837    | CASP4    | caspase 4, apoptosis-related cysteine peptidase                                          |
| 3916   | LAMP1    | lysosomal-associated membrane protein 1                                                  |
| 9960   | USP3     | ubiquitin specific peptidase 3                                                           |
| 11025  | LILRB3   | leukocyte immunoglobulin-like receptor, subfamily B (with TM and ITIM domains), member 3 |
| 7450   | VWF      | von Willebrand factor                                                                    |
| 126669 | SHE      | Src homology 2 domain containing E                                                       |
| 116238 | TLCD1    | TLC domain containing 1                                                                  |

### CD16+ monocytes (downregulated genes)

| ENTREZ ID | Gene Symbol | Gene Name                                                                                                      |
|-----------|-------------|----------------------------------------------------------------------------------------------------------------|
| 2322      | FLT3        | fms-related tyrosine kinase 3                                                                                  |
| 23151     | GRAMD4      | GRAM domain containing 4                                                                                       |
| 2876      | GPX1        | glutathione peroxidase 1                                                                                       |
| 9744      | ACAP1       | ArfGAP with coiled-coil, ankyrin repeat and PH domains 1                                                       |
| 109       | ADCY3       | adenylate cyclase 3                                                                                            |
| 23677     | SH3BP4      | SH3-domain binding protein 4                                                                                   |
| 11270     | NRM         | nurim (nuclear envelope membrane protein)                                                                      |
| 4257      | MGST1       | microsomal glutathione S-transferase 1                                                                         |
| 3111      | HLA-DOA     | major histocompatibility complex, class II, DO alpha                                                           |
| 29803     | REPIN1      | replication initiator 1                                                                                        |
| 113675    | SDSL        | serine dehydratase-like                                                                                        |
| 5445      | PON2        | paraoxonase 2                                                                                                  |
| 85012     | TCEAL3      | transcription elongation factor A (SII)-like 3                                                                 |
| 642       | BLMH        | bleomycin hydrolase                                                                                            |
| 64784     | CRTC3       | CREB regulated transcription coactivator 3                                                                     |
| 3108      | HLA-DMA     | major histocompatibility complex, class II, DM alpha                                                           |
| 125144    | NCRNA00188  | non-protein coding RNA 188                                                                                     |
| 140467    | ZNF358      | zinc finger protein 358                                                                                        |
| 2535      | FZD2        | frizzled homolog 2 (Drosophila)                                                                                |
| 80212     | CCDC92      | coiled-coil domain containing 92                                                                               |
| 29903     | CCDC106     | coiled-coil domain containing 106                                                                              |
| 1798      | DPAGT1      | dolichyl-phosphate (UDP-N-acetylglucosamine) N-acetylglucosaminophosphotransferase 1 (GlcNAc-1-P transferase)  |
| 64218     | SEMA4A      | sema domain, immunoglobulin domain(Ig), transmembrane domain(TM) and short cytoplasmic domain, (semaphorin) 4A |
| 6209      | RPS15       | ribosomal protein S15                                                                                          |
| 51060     | TXNDC12     | thioredoxin domain containing 12 (endoplasmic reticulum)                                                       |
| 157285    | SGK223      | homolog of rat pragma of Rnd2                                                                                  |
| 81932     | HDHD3       | haloacid dehalogenase-like hydrolase domain containing 3                                                       |
| 6133      | RPL9        | ribosomal protein L9                                                                                           |
| 5863      | RGL2        | ral guanine nucleotide dissociation stimulator-like 2                                                          |
| 5993      | RFX5        | regulatory factor X, 5 (influences HLA class II expression)                                                    |
| 7371      | UCK2        | uridine-cytidine kinase 2                                                                                      |
| 51133     | KCTD3       | potassium channel tetramerisation domain containing 3                                                          |
| 3092      | HIP1        | huntingtin interacting protein 1                                                                               |
| 4752      | NEK3        | NIMA (never in mitosis gene a)-related kinase 3                                                                |
| 2788      | GNP7        | guanine nucleotide binding protein (G protein), gamma 7                                                        |
| 6234      | RPS28       | ribosomal protein S28                                                                                          |
| 90843     | TCEAL8      | transcription elongation factor A (SII)-like 8                                                                 |
| 51754     | TMEM8B      | transmembrane protein 8B                                                                                       |
| 2531      | KDSR        | 3-ketodihydrospingosine reductase                                                                              |
| 80305     | TRABD       | TraB domain containing                                                                                         |
| 2120      | ETV6        | ets variant 6                                                                                                  |
| 7570      | ZNF22       | zinc finger protein 22 (KOX 15)                                                                                |
| 6443      | SGCB        | sarcoglycan, beta (43kDa dystrophin-associated glycoprotein)                                                   |
| 4171      | MCM2        | minichromosome maintenance complex component 2                                                                 |
| 9804      | TOMM20      | translocase of outer mitochondrial membrane 20 homolog (yeast)                                                 |
| 6176      | RPLP1       | ribosomal protein, large, P1                                                                                   |
| 286102    | TMED10P1    | transmembrane emp24-like trafficking protein 10 (yeast) pseudogene 1                                           |
| 84879     | MFSD2A      | major facilitator superfamily domain containing 2A                                                             |
| 8407      | TAGLN2      | transgelin 2                                                                                                   |
| 51314     | TXNDC3      | thioredoxin domain containing 3 (spermatzoa)                                                                   |
| 2926      | GRSF1       | G-rich RNA sequence binding factor 1                                                                           |
| 8943      | AP3D1       | adaptor-related protein complex 3, delta 1 subunit                                                             |
| 1200      | TPP1        | tripeptidyl peptidase 1                                                                                        |
| 6396      | SEC13       | SEC13 homolog (S. cerevisiae)                                                                                  |
| 54849     | DEF8        | differentially expressed in FDCP 8 homolog (mouse)                                                             |
| 3957      | LGALS2      | lectin, galactoside-binding, soluble, 2                                                                        |
| 130589    | GALM        | galactose mutarotase (aldose 1-epimerase)                                                                      |
| 157567    | ANKRD46     | ankyrin repeat domain 46                                                                                       |
| 5296      | PIK3R2      | phosphoinositide-3-kinase, regulatory subunit 2 (beta)                                                         |
| 80145     | THOC7       | THO complex 7 homolog (Drosophila)                                                                             |
| 6202      | RPS8        | ribosomal protein S8                                                                                           |
| 283345    | RPL13P5     | ribosomal protein L13 pseudogene 5                                                                             |
| 3490      | IGFBP7      | insulin-like growth factor binding protein 7                                                                   |
| 6175      | RPLP0       | ribosomal protein, large, P0                                                                                   |
| 9577      | BRE         | brain and reproductive organ-expressed (TNFRSF1A modulator)                                                    |
| 8192      | CLPP        | CipP caseinolytic peptidase, ATP-dependent, proteolytic subunit homolog (E. coli)                              |
| 57533     | TBC1D14     | TBC1 domain family, member 14                                                                                  |

|           |              |                                                                                                        |
|-----------|--------------|--------------------------------------------------------------------------------------------------------|
| 30968     | STOML2       | stomatin (EPB72)-like 2                                                                                |
| 8575      | PRKRA        | protein kinase, interferon-inducible double stranded RNA dependent activator                           |
| 7594      | ZNF43        | zinc finger protein 43                                                                                 |
| 9466      | IL27RA       | interleukin 27 receptor, alpha                                                                         |
| 283102    | FLJ46111     | keratin 8 pseudogene                                                                                   |
| 6168      | RPL37A       | ribosomal protein L37a                                                                                 |
| 6205      | RPS11        | ribosomal protein S11                                                                                  |
| 6626      | SNRPA        | small nuclear ribonucleoprotein polypeptide A                                                          |
| 256355    | RPS2P32      | ribosomal protein S2 pseudogene 32                                                                     |
| 11070     | TMEM115      | transmembrane protein 115                                                                              |
| 2289      | FKBP5        | FK506 binding protein 5                                                                                |
| 29927     | SEC61A1      | Sec61 alpha 1 subunit (S. cerevisiae)                                                                  |
| 5176      | SERPINF1     | serpin peptidase inhibitor, clade F (alpha-2 antiplasmin, pigment epithelium derived factor), member 1 |
| 63875     | MRPL17       | mitochondrial ribosomal protein L17                                                                    |
| 79004     | CUEDC2       | CUE domain containing 2                                                                                |
| 51107     | APH1A        | anterior pharynx defective 1 homolog A (C. elegans)                                                    |
| 26354     | GNL3         | guanine nucleotide binding protein-like 3 (nucleolar)                                                  |
| 3074      | HEXB         | hexosaminidase B (beta polypeptide)                                                                    |
| 9117      | SEC22C       | SEC22 vesicle trafficking protein homolog C (S. cerevisiae)                                            |
| 4999      | ORC2         | origin recognition complex, subunit 2                                                                  |
| 1201      | CLN3         | ceroid-lipofuscinosis, neuronal 3                                                                      |
| 8669      | EIF3J        | eukaryotic translation initiation factor 3, subunit J                                                  |
| 4723      | NDUFB1       | NADH dehydrogenase (ubiquinone) flavoprotein 1, 51kDa                                                  |
| 51056     | LAP3         | leucine aminopeptidase 3                                                                               |
| 5747      | PTK2         | PTK2 protein tyrosine kinase 2                                                                         |
| 58505     | OSTC         | oligosaccharyltransferase complex subunit                                                              |
| 3615      | IMPDH2       | IMP (inosine 5'-monophosphate) dehydrogenase 2                                                         |
| 8991      | SELENBP1     | selenium binding protein 1                                                                             |
| 6892      | TAPBP        | TAP binding protein (tapasin)                                                                          |
| 51011     | FAHD2A       | fumarylacetoacetate hydrolase domain containing 2A                                                     |
| 23231     | SEL1L3       | sel-1 suppressor of lin-12-like 3 (C. elegans)                                                         |
| 90313     | TP53I13      | tumor protein p53 inducible protein 13                                                                 |
| 274       | BIN1         | bridging integrator 1                                                                                  |
| 29844     | TFPT         | TCF3 (E2A) fusion partner (in childhood Leukemia)                                                      |
| 9044      | BTA1         | BTA1 RNA polymerase II, B-TFIID transcription factor-associated, 170kDa (Mot1 homolog, S. cerevisiae)  |
| 148789    | B3GALNT2     | beta-1,3-N-acetylgalactosaminyltransferase 2                                                           |
| 7263      | TST          | thiosulfate sulfurtransferase (rhodanese)                                                              |
| 57212     | KIAA0495     | KIAA0495                                                                                               |
| 7982      | ST7          | suppression of tumorigenicity 7                                                                        |
| 6161      | RPL32        | ribosomal protein L32                                                                                  |
| 85440     | DOCK7        | dedicator of cytokinesis 7                                                                             |
| 689       | BTF3         | basic transcription factor 3                                                                           |
| 6143      | RPL19        | ribosomal protein L19                                                                                  |
| 909       | CD1A         | CD1a molecule                                                                                          |
| 151313    | FAHD2B       | fumarylacetoacetate hydrolase domain containing 2B                                                     |
| 54985     | HCFC1R1      | host cell factor C1 regulator 1 (XPO1 dependent)                                                       |
| 57026     | PDXP         | pyridoxal (pyridoxine, vitamin B6) phosphatase                                                         |
| 653162    | RPSAP9       | ribosomal protein SA pseudogene 9                                                                      |
| 29994     | BAZ2B        | bromodomain adjacent to zinc finger domain, 2B                                                         |
| 1632      | DCI          | dodecenoyl-CoA isomerase                                                                               |
| 4245      | MGAT1        | mannosyl (alpha-1,3-)-glycoprotein beta-1,2-N-acetylglucosaminyltransferase                            |
| 6194      | RPS6         | ribosomal protein S6                                                                                   |
| 1139      | CHRNA7       | cholinergic receptor, nicotinic, alpha 7                                                               |
| 10959     | TMED2        | transmembrane emp24 domain trafficking protein 2                                                       |
| 126755    | LRRRC38      | leucine rich repeat containing 38                                                                      |
| 6158      | RPL28        | ribosomal protein L28                                                                                  |
| 57176     | VARS2        | valyl-tRNA synthetase 2, mitochondrial (putative)                                                      |
| 9552      | SPAG7        | sperm associated antigen 7                                                                             |
| 860       | RUNX2        | runt-related transcription factor 2                                                                    |
| 8975      | USP13        | ubiquitin specific peptidase 13 (isopeptidase T-3)                                                     |
| 6125      | RPL5         | ribosomal protein L5                                                                                   |
| 163732    | CITED4       | Cbp/p300-interacting transactivator, with Glu/Asp-rich carboxy-terminal domain, 4                      |
| 79174     | CRELD2       | cysteine-rich with EGF-like domains 2                                                                  |
| 3682      | ITGAE        | integrin, alpha E (antigen CD103, human mucosal lymphocyte antigen 1; alpha polypeptide)               |
| 26996     | GPR160       | G protein-coupled receptor 160                                                                         |
| 27346     | TMEM97       | transmembrane protein 97                                                                               |
| 11188     | NISCH        | nischarin                                                                                              |
| 285148    | IAH1         | isoamyl acetate-hydrolyzing esterase 1 homolog (S. cerevisiae)                                         |
| 199990    | C1orf86      | chromosome 1 open reading frame 86                                                                     |
| 402       | ARL2         | ADP-ribosylation factor-like 2                                                                         |
| 100289019 | LOC100289019 | hypothetical LOC100289019                                                                              |
| 5074      | PAWR         | PRKC, apoptosis, WT1, regulator                                                                        |
| 6160      | RPL31        | ribosomal protein L31                                                                                  |
| 56623     | INPP5E       | inositol polyphosphate-5-phosphatase, 72 kDa                                                           |
| 645683    | RPL13AP3     | ribosomal protein L13a pseudogene 3                                                                    |
| 493       | ATP2B4       | ATPase, Ca++ transporting, plasma membrane 4                                                           |
| 359948    | IRF2BP2      | interferon regulatory factor 2 binding protein 2                                                       |
| 6137      | RPL13        | ribosomal protein L13                                                                                  |
| 255758    | TCTEX1D2     | Tctex1 domain containing 2                                                                             |
| 93663     | ARHGAP18     | Rho GTPase activating protein 18                                                                       |
| 6189      | RPS3A        | ribosomal protein S3A                                                                                  |
| 6138      | RPL15        | ribosomal protein L15                                                                                  |
| 22807     | IKZF2        | IKAROS family zinc finger 2 (Helios)                                                                   |
| 6187      | RPS2         | ribosomal protein S2                                                                                   |
| 8766      | RAB11A       | RAB11A, member RAS oncogene family                                                                     |
| 10205     | MPZL2        | myelin protein zero-like 2                                                                             |
| 56922     | MCCC1        | methylcrotonoyl-CoA carboxylase 1 (alpha)                                                              |
| 641638    | SNHG6        | small nucleolar RNA host gene 6 (non-protein coding)                                                   |
| 26985     | AP3M1        | adaptor-related protein complex 3, mu 1 subunit                                                        |
| 56271     | BEX4         | brain expressed, X-linked 4                                                                            |
| 6181      | RPLP2        | ribosomal protein, large, P2                                                                           |
| 9501      | RPH3AL       | rabphilin 3A-like (without C2 domains)                                                                 |
| 55911     | APOBR        | apolipoprotein B receptor                                                                              |
| 55959     | SULF2        | sulfatase 2                                                                                            |
| 3551      | IKBKB        | inhibitor of kappa light polypeptide gene enhancer in B-cells, kinase beta                             |

|        |           |                                                                    |
|--------|-----------|--------------------------------------------------------------------|
| 5425   | POLD2     | polymerase (DNA directed), delta 2, regulatory subunit 50kDa       |
| 10174  | SORBS3    | sorbin and SH3 domain containing 3                                 |
| 56924  | PAK6      | p21 protein (Cdc42/Rac)-activated kinase 6                         |
| 3156   | HMGCR     | 3-hydroxy-3-methylglutaryl-CoA reductase                           |
| 118433 | RPL23AP7  | ribosomal protein L23a pseudogene 7                                |
| 6207   | RPS13     | ribosomal protein S13                                              |
| 387066 | SNHG5     | small nucleolar RNA host gene 5 (non-protein coding)               |
| 23158  | TBC1D9    | TBC1 domain family, member 9 (with GRAM domain)                    |
| 644511 | RPL13AP6  | ribosomal protein L13a pseudogene 6                                |
| 9637   | FEZ2      | fasciculation and elongation protein zeta 2 (zygin II)             |
| 401321 | LOC401321 | hypothetical LOC401321                                             |
| 51727  | CMPK1     | cytidine monophosphate (UMP-CMP) kinase 1, cytosolic               |
| 7405   | UVRAG     | UV radiation resistance associated gene                            |
| 6228   | RPS23     | ribosomal protein S23                                              |
| 79140  | CDC28B    | coiled-coil domain containing 28B                                  |
| 54733  | SLC35F2   | solute carrier family 35, member F2                                |
| 2529   | FUT7      | fucosyltransferase 7 (alpha (1,3) fucosyltransferase)              |
| 7307   | U2AF1     | U2 small nuclear RNA auxiliary factor 1                            |
| 79921  | TCEAL4    | transcription elongation factor A (SII)-like 4                     |
| 9631   | NUP155    | nucleoporin 155kDa                                                 |
| 8425   | LTBP4     | latent transforming growth factor beta binding protein 4           |
| 80765  | STARD5    | StAR-related lipid transfer (START) domain containing 5            |
| 6128   | RPL6      | ribosomal protein L6                                               |
| 51559  | NT5DC3    | 5'-nucleotidase domain containing 3                                |
| 9692   | KIAA0391  | KIAA0391                                                           |
| 8455   | ATRN      | atractin                                                           |
| 9889   | ZBED4     | zinc finger, BED-type containing 4                                 |
| 971    | CD72      | CD72 molecule                                                      |
| 1595   | CYP51A1   | cytochrome P450, family 51, subfamily A, polypeptide 1             |
| 6728   | SRP19     | signal recognition particle 19kDa                                  |
| 10576  | CCT2      | chaperonin containing TCP1, subunit 2 (beta)                       |
| 203069 | R3HCC1    | R3H domain and coiled-coil containing 1                            |
| 85453  | TSPYL5    | TSPY-like 5                                                        |
| 6193   | RPS5      | ribosomal protein S5                                               |
| 2091   | FBL       | fibrillarin                                                        |
| 113179 | ADAT3     | adenosine deaminase, tRNA-specific 3, TAD3 homolog (S. cerevisiae) |
| 9855   | FARP2     | FERM, RhoGEF and pleckstrin domain protein 2                       |
| 10455  | PECI      | peroxisomal D3,D2-enoyl-CoA isomerase                              |
| 6201   | RPS7      | ribosomal protein S7                                               |
| 440    | ASNS      | asparagine synthetase (glutamine-hydrolyzing)                      |
| 64764  | CREB3L2   | cAMP responsive element binding protein 3-like 2                   |
| 23002  | DAAM1     | dishevelled associated activator of morphogenesis 1                |
| 129293 | C2orf89   | chromosome 2 open reading frame 89                                 |
| 6155   | RPL27     | ribosomal protein L27                                              |
| 8665   | EIF3F     | eukaryotic translation initiation factor 3, subunit F              |
| 286053 | NSMCE2    | non-SMC element 2, MMS21 homolog (S. cerevisiae)                   |
| 587    | BCAT2     | branched chain amino-acid transaminase 2, mitochondrial            |
| 6622   | SNCA      | synuclein, alpha (non A4 component of amyloid precursor)           |
| 1066   | CES1      | carboxylesterase 1                                                 |
| 79746  | ECHDC3    | enoyl CoA hydratase domain containing 3                            |
| 729786 | GOLGA8C   | golgin A8 family, member C                                         |
| 23394  | ADNP      | activity-dependent neuroprotector homeobox                         |
| 25845  | LOC25845  | hypothetical LOC25845                                              |
| 84953  | MICALCL   | MICAL C-terminal like                                              |
| 388564 | LOC388564 | hypothetical protein LOC388564                                     |
| 79713  | TMEM149   | transmembrane protein 149                                          |
| 646567 | LOC646567 | oligosaccharyltransferase complex subunit OSTC-like                |
| 55816  | DOK5      | docking protein 5                                                  |
| 10360  | NPM3      | nucleophosmin/nucleoplasmin 3                                      |
| 64759  | TNS3      | tensin 3                                                           |
| 84451  | KIAA1804  | mixed lineage kinase 4                                             |
| 10632  | ATP5L     | ATP synthase, H+ transporting, mitochondrial Fo complex, subunit G |
| 8841   | HDAC3     | histone deacetylase 3                                              |
| 911    | CD1C      | CD1c molecule                                                      |
| 79630  | C1orf54   | chromosome 1 open reading frame 54                                 |
| 10113  | PREB      | prolactin regulatory element binding                               |
| 27130  | INVS      | inversin                                                           |
| 9588   | PRDX6     | peroxiredoxin 6                                                    |
| 253769 | WDR27     | WD repeat domain 27                                                |
| 64221  | ROBO3     | roundabout, axon guidance receptor, homolog 3 (Drosophila)         |
| 29100  | TMEM208   | transmembrane protein 208                                          |
| 64073  | C19orf33  | chromosome 19 open reading frame 33                                |
| 4736   | RPL10A    | ribosomal protein L10a                                             |
| 4649   | MYO9A     | myosin IXA                                                         |
| 79710  | MORC4     | MORC family CW-type zinc finger 4                                  |
| 84080  | C16orf48  | chromosome 16 open reading frame 48                                |
| 9727   | RAB11FIP3 | RAB11 family interacting protein 3 (class II)                      |
| 6141   | RPL18     | ribosomal protein L18                                              |
| 1933   | EEF1B2    | eukaryotic translation elongation factor 1 beta 2                  |
| 84717  | HDGFRP2   | hepatoma-derived growth factor-related protein 2                   |
| 4839   | NOP2      | NOP2 nucleolar protein homolog (yeast)                             |
| 649946 | RPL23AP64 | ribosomal protein L23a pseudogene 64                               |
| 134    | ADORA1    | adenosine A1 receptor                                              |
| 131474 | CHCHD4    | coiled-coil-helix-coiled-coil-helix domain containing 4            |
| 54454  | ATAD2B    | ATPase family, AAA domain containing 2B                            |
| 1431   | CS        | citrate synthase                                                   |
| 349196 | LOC349196 | hypothetical LOC349196                                             |
| 11164  | NUDT5     | nudix (nucleoside diphosphate linked moiety X)-type motif 5        |
| 7554   | ZNF8      | zinc finger protein 8                                              |
| 6721   | SREBF2    | sterol regulatory element binding transcription factor 2           |
| 6335   | SCN9A     | sodium channel, voltage-gated, type IX, alpha subunit              |
| 6188   | RPS3      | ribosomal protein S3                                               |
| 79469  | DLEU2L    | deleted in lymphocytic leukemia 2-like                             |
| 64080  | RBKS      | ribokinase                                                         |
| 10213  | PSMD14    | proteasome (prosome, macropain) 26S subunit, non-ATPase, 14        |

|           |            |                                                                                                |
|-----------|------------|------------------------------------------------------------------------------------------------|
| 7226      | TRPM2      | transient receptor potential cation channel, subfamily M, member 2                             |
| 55214     | LEPREL1    | leprecan-like 1                                                                                |
| 501       | ALDH7A1    | aldehyde dehydrogenase 7 family, member A1                                                     |
| 81539     | SLC38A1    | solute carrier family 38, member 1                                                             |
| 10330     | CNPY2      | canopy 2 homolog (zebrafish)                                                                   |
| 6152      | RPL24      | ribosomal protein L24                                                                          |
| 10106     | CTDSP2     | CTD (carboxy-terminal domain, RNA polymerase II, polypeptide A) small phosphatase 2            |
| 5150      | PDE7A      | phosphodiesterase 7A                                                                           |
| 2644      | GCHFR      | GTP cyclohydrolase I feedback regulator                                                        |
| 23646     | PLD3       | phospholipase D family, member 3                                                               |
| 5546      | PRCC       | papillary renal cell carcinoma (translocation-associated)                                      |
| 10462     | CLEC10A    | C-type lectin domain family 10, member A                                                       |
| 51455     | REV1       | REV1 homolog (S. cerevisiae)                                                                   |
| 92610     | TIFA       | TRAF-interacting protein with forkhead-associated domain                                       |
| 25849     | PARM1      | prostate androgen-regulated mucin-like protein 1                                               |
| 85015     | USP45      | ubiquitin specific peptidase 45                                                                |
| 6157      | RPL27A     | ribosomal protein L27a                                                                         |
| 10681     | GNB5       | guanine nucleotide binding protein (G protein), beta 5                                         |
| 8706      | B3GALNT1   | beta-1,3-N-acetylgalactosaminyltransferase 1 (globoside blood group)                           |
| 9296      | ATP6V1F    | ATPase, H+ transporting, lysosomal 14kDa, V1 subunit F                                         |
| 23521     | RPL13A     | ribosomal protein L13a                                                                         |
| 55790     | CSGALNACT1 | chondroitin sulfate N-acetylgalactosaminyltransferase 1                                        |
| 55526     | DHTKD1     | dehydrogenase E1 and transketolase domain containing 1                                         |
| 3693      | ITGB5      | integrin, beta 5                                                                               |
| 100131211 | TMEM194B   | transmembrane protein 194B                                                                     |
| 1616      | DAXX       | death-domain associated protein                                                                |
| 348110    | C15orf38   | chromosome 15 open reading frame 38                                                            |
| 388574    | FLJ43681   | ribosomal protein L23a pseudogene                                                              |
| 23234     | DNAJC9     | DnaJ (Hsp40) homolog, subfamily C, member 9                                                    |
| 54869     | EPS8L1     | EPS8-like 1                                                                                    |
| 10863     | ADAM28     | ADAM metallopeptidase domain 28                                                                |
| 23474     | ETHE1      | ethylmalonic encephalopathy 1                                                                  |
| 2184      | FAH        | fumarylacetoacetate hydrolase (fumarylacetoacetase)                                            |
| 6136      | RPL12      | ribosomal protein L12                                                                          |
| 54806     | AHI1       | Abelson helper integration site 1                                                              |
| 23193     | GANAB      | glucosidase, alpha; neutral AB                                                                 |
| 440567    | UQCRHL     | ubiquinol-cytochrome c reductase hinge protein-like                                            |
| 9404      | LPXN       | leupaxin                                                                                       |
| 55227     | LRRC1      | leucine rich repeat containing 1                                                               |
| 343477    | HSP90B3P   | heat shock protein 90kDa beta (Grp94), member 3 (pseudogene)                                   |
| 78999     | LRFN4      | leucine rich repeat and fibronectin type III domain containing 4                               |
| 9725      | TMEM63A    | transmembrane protein 63A                                                                      |
| 6732      | SRPK1      | SRSF protein kinase 1                                                                          |
| 155370    | SBDSP1     | Shwachman-Bodian-Diamond syndrome pseudogene 1                                                 |
| 145508    | C14orf145  | chromosome 14 open reading frame 145                                                           |
| 6191      | RPS4X      | ribosomal protein S4, X-linked                                                                 |
| 64854     | USP46      | ubiquitin specific peptidase 46                                                                |
| 3703      | STT3A      | STT3, subunit of the oligosaccharyltransferase complex, homolog A (S. cerevisiae)              |
| 9197      | SLC33A1    | solute carrier family 33 (acetyl-CoA transporter), member 1                                    |
| 10947     | AP3M2      | adaptor-related protein complex 3, mu 2 subunit                                                |
| 5738      | PTGFRN     | prostaglandin F2 receptor negative regulator                                                   |
| 51477     | ISYNA1     | inositol-3-phosphate synthase 1                                                                |
| 56926     | NCLN       | nicalin                                                                                        |
| 2205      | FCER1A     | Fc fragment of IgE, high affinity I, receptor for; alpha polypeptide                           |
| 26031     | OSBPL3     | oxysterol binding protein-like 3                                                               |
| 29121     | CLEC2D     | C-type lectin domain family 2, member D                                                        |
| 84617     | TUBB6      | tubulin, beta 6                                                                                |
| 1394      | CRHR1      | corticotropin releasing hormone receptor 1                                                     |
| 1235      | CCR6       | chemokine (C-C motif) receptor 6                                                               |
| 80347     | COASY      | CoA synthase                                                                                   |
| 9051      | PSTPIP1    | proline-serine-threonine phosphatase interacting protein 1                                     |
| 11006     | LILRB4     | leukocyte immunoglobulin-like receptor, subfamily B (with TM and ITIM domains), member 4       |
| 3921      | RPSA       | ribosomal protein SA                                                                           |
| 11279     | KLF8       | Kruppel-like factor 8                                                                          |
| 6233      | RPS27A     | ribosomal protein S27a                                                                         |
| 5364      | PLXNB1     | plexin B1                                                                                      |
| 6235      | RPS29      | ribosomal protein S29                                                                          |
| 84447     | SYVN1      | synovial apoptosis inhibitor 1, synoviolin                                                     |
| 1793      | DOCK1      | dedicator of cytokinesis 1                                                                     |
| 8481      | OFD1       | oral-facial-digital syndrome 1                                                                 |
| 252969    | NEIL2      | nei endonuclease VIII-like 2 (E. coli)                                                         |
| 150946    | FAM59B     | family with sequence similarity 59, member B                                                   |
| 2194      | FASN       | fatty acid synthase                                                                            |
| 60481     | ELOVL5     | ELOVL family member 5, elongation of long chain fatty acids (FEN1/Elo2, SUR4/Elo3-like, yeast) |
| 22872     | SEC31A     | SEC31 homolog A (S. cerevisiae)                                                                |
| 283248    | RCOR2      | REST corepressor 2                                                                             |
| 84705     | GTPBP3     | GTP binding protein 3 (mitochondrial)                                                          |
| 29956     | LASS2      | LAG1 homolog, ceramide synthase 2                                                              |
| 286367    | LOC286367  | FP944                                                                                          |
| 84572     | GNPTG      | N-acetylglucosamine-1-phosphate transferase, gamma subunit                                     |
| 6540      | SLC6A13    | solute carrier family 6 (neurotransmitter transporter, GABA), member 13                        |
| 729739    | LOC729739  | hypothetical LOC729739                                                                         |
| 23333     | DPY19L1    | dpy-19-like 1 (C. elegans)                                                                     |
| 55813     | UTP6       | UTP6, small subunit (SSU) processome component, homolog (yeast)                                |
| 343413    | FCRL6      | Fc receptor-like 6                                                                             |
| 1803      | DPP4       | dipeptidyl-peptidase 4                                                                         |
| 196996    | GRAMD2     | GRAM domain containing 2                                                                       |
| 1601      | DAB2       | disabled homolog 2, mitogen-responsive phosphoprotein (Drosophila)                             |
| 374882    | TMEM205    | transmembrane protein 205                                                                      |
| 57576     | KIF17      | kinesin family member 17                                                                       |
| 10755     | GIPC1      | GIPC PDZ domain containing family, member 1                                                    |
| 80867     | HCG2P7     | HLA complex group 2 pseudogene 7                                                               |
| 4358      | MPV17      | MpV17 mitochondrial inner membrane protein                                                     |
| 257364    | SNX33      | sorting nexin 33                                                                               |
| 144100    | PLEKHA7    | pleckstrin homology domain containing, family A member 7                                       |

|           |              |                                                                                                      |
|-----------|--------------|------------------------------------------------------------------------------------------------------|
| 1994      | ELAVL1       | ELAV (embryonic lethal, abnormal vision, Drosophila)-like 1 (Hu antigen R)                           |
| 7528      | YY1          | YY1 transcription factor                                                                             |
| 4638      | MYLK         | myosin light chain kinase                                                                            |
| 10606     | PAICS        | phosphoribosylaminoimidazole carboxylase, phosphoribosylaminoimidazole succinocarboxamide synthetase |
| 23649     | POLA2        | polymerase (DNA directed), alpha 2 (70kD subunit)                                                    |
| 151648    | SGOL1        | shugoshin-like 1 (S. pombe)                                                                          |
| 55353     | LAPTM4B      | lysosomal protein transmembrane 4 beta                                                               |
| 166929    | SGMS2        | sphingomyelin synthase 2                                                                             |
| 54893     | MTMR10       | myotubularin related protein 10                                                                      |
| 6146      | RPL22        | ribosomal protein L22                                                                                |
| 56954     | NIT2         | nitrilase family, member 2                                                                           |
| 27018     | NGFRAP1      | nerve growth factor receptor (TNFRSF16) associated protein 1                                         |
| 3159      | HMGAI1       | high mobility group AT-hook 1                                                                        |
| 6920      | TCEA3        | transcription elongation factor A (SII), 3                                                           |
| 26249     | KLHL3        | kelch-like 3 (Drosophila)                                                                            |
| 27143     | KIAA1274     | KIAA1274                                                                                             |
| 26003     | GORASP2      | golgi reassembly stacking protein 2, 55kDa                                                           |
| 317781    | DDX51        | DEAD (Asp-Glu-Ala-Asp) box polypeptide 51                                                            |
| 440563    | LOC440563    | heterogeneous nuclear ribonucleoprotein C-like                                                       |
| 55756     | INTS9        | integrator complex subunit 9                                                                         |
| 142678    | MIB2         | mindbomb homolog 2 (Drosophila)                                                                      |
| 57475     | PLEKH11      | pleckstrin homology domain containing, family H (with MyTH4 domain) member 1                         |
| 55614     | KIF16B       | kinesin family member 16B                                                                            |
| 6165      | RPL35A       | ribosomal protein L35a                                                                               |
| 11320     | MGAT4A       | mannosyl (alpha-1,3-)-glycoprotein beta-1,4-N-acetylglucosaminyltransferase, isozyme A               |
| 81544     | GDPD5        | glycerophosphodiester phosphodiesterase domain containing 5                                          |
| 131566    | DCBLD2       | discoidin, CUB and LCCL domain containing 2                                                          |
| 9319      | TRIP13       | thyroid hormone receptor interactor 13                                                               |
| 3925      | STMN1        | stathmin 1                                                                                           |
| 1718      | DHCR24       | 24-dehydrocholesterol reductase                                                                      |
| 50854     | C6orf48      | chromosome 6 open reading frame 48                                                                   |
| 51222     | ZNF219       | zinc finger protein 219                                                                              |
| 65985     | AACS         | acetoacetyl-CoA synthetase                                                                           |
| 2162      | F13A1        | coagulation factor XIII, A1 polypeptide                                                              |
| 80223     | RAB11FIP1    | RAB11 family interacting protein 1 (class I)                                                         |
| 4642      | MYO1D        | myosin ID                                                                                            |
| 4283      | CXCL9        | chemokine (C-X-C motif) ligand 9                                                                     |
| 53947     | A4GALT       | alpha 1,4-galactosyltransferase                                                                      |
| 9651      | PLCH2        | phospholipase C, eta 2                                                                               |
| 3338      | DNAJC4       | DnaJ (Hsp40) homolog, subfamily C, member 4                                                          |
| 653125    | LOC653125    | Golgin subfamily A member 8-like protein 1-like                                                      |
| 51134     | CCDC41       | coiled-coil domain containing 41                                                                     |
| 26227     | PHGDH        | phosphoglycerate dehydrogenase                                                                       |
| 116842    | LEAP2        | liver expressed antimicrobial peptide 2                                                              |
| 2859      | GPR35        | G protein-coupled receptor 35                                                                        |
| 6122      | RPL3         | ribosomal protein L3                                                                                 |
| 80183     | C13orf18     | chromosome 13 open reading frame 18                                                                  |
| 9901      | SRGAP3       | SLIT-ROBO Rho GTPase activating protein 3                                                            |
| 28969     | BZW2         | basic leucine zipper and W2 domains 2                                                                |
| 9962      | SLC23A2      | solute carrier family 23 (nucleobase transporters), member 2                                         |
| 53826     | FXYD6        | FXYD domain containing ion transport regulator 6                                                     |
| 9249      | DHRS3        | dehydrogenase/reductase (SDR family) member 3                                                        |
| 84707     | BEX2         | brain expressed X-linked 2                                                                           |
| 9601      | PDIA4        | protein disulfide isomerase family A, member 4                                                       |
| 221188    | GPR114       | G protein-coupled receptor 114                                                                       |
| 11339     | OIP5         | Opa interacting protein 5                                                                            |
| 55897     | MESP1        | mesoderm posterior 1 homolog (mouse)                                                                 |
| 11224     | RPL35        | ribosomal protein L35                                                                                |
| 9332      | CD163        | CD163 molecule                                                                                       |
| 9394      | HS6ST1       | heparan sulfate 6-O-sulfotransferase 1                                                               |
| 29760     | BLNK         | B-cell linker                                                                                        |
| 9709      | HERPUD1      | homocysteine-inducible, endoplasmic reticulum stress-inducible, ubiquitin-like domain member 1       |
| 910       | CD1B         | CD1b molecule                                                                                        |
| 7976      | FZD3         | frizzled homolog 3 (Drosophila)                                                                      |
| 10009     | ZBTB33       | zinc finger and BTB domain containing 33                                                             |
| 60673     | C12orf44     | chromosome 12 open reading frame 44                                                                  |
| 158056    | MAMDC4       | MAM domain containing 4                                                                              |
| 2944      | GSTM1        | glutathione S-transferase mu 1                                                                       |
| 2948      | GSTM4        | glutathione S-transferase mu 4                                                                       |
| 147372    | CCBE1        | collagen and calcium binding EGF domains 1                                                           |
| 79805     | VASH2        | vasohibin 2                                                                                          |
| 64798     | DEPTOR       | DEP domain containing MTOR-interacting protein                                                       |
| 6484      | ST3GAL4      | ST3 beta-galactoside alpha-2,3-sialyltransferase 4                                                   |
| 6608      | SMO          | smoothened homolog (Drosophila)                                                                      |
| 9973      | CCS          | copper chaperone for superoxide dismutase                                                            |
| 160518    | DENND5B      | DENN/MADD domain containing 5B                                                                       |
| 57728     | WDR19        | WD repeat domain 19                                                                                  |
| 7915      | ALDH5A1      | aldehyde dehydrogenase 5 family, member A1                                                           |
| 390539    | OR4N3P       | olfactory receptor, family 4, subfamily N, member 3 pseudogene                                       |
| 23390     | ZDHHC17      | zinc finger, DHHC-type containing 17                                                                 |
| 7292      | TNFSF4       | tumor necrosis factor (ligand) superfamily, member 4                                                 |
| 27240     | SIT1         | signaling threshold regulating transmembrane adaptor 1                                               |
| 201725    | C4orf46      | chromosome 4 open reading frame 46                                                                   |
| 730101    | LOC730101    | hypothetical LOC730101                                                                               |
| 121053    | C12orf45     | chromosome 12 open reading frame 45                                                                  |
| 3815      | KIT          | v-kit Hardy-Zuckerman 4 feline sarcoma viral oncogene homolog                                        |
| 55300     | PI4K2B       | phosphatidylinositol 4-kinase type 2 beta                                                            |
| 100506033 | LOC100506033 | hypothetical LOC100506033                                                                            |
| 23428     | SLC7A8       | solute carrier family 7 (amino acid transporter, L-type), member 8                                   |
| 60468     | BACH2        | BTB and CNC homology 1, basic leucine zipper transcription factor 2                                  |
| 117144    | CATSPER1     | cation channel, sperm associated 1                                                                   |
| 169611    | OLFML2A      | olfactomedin-like 2A                                                                                 |
| 28978     | TMEM14A      | transmembrane protein 14A                                                                            |
| 4041      | LRP5         | low density lipoprotein receptor-related protein 5                                                   |
| 221692    | PHACTR1      | phosphatase and actin regulator 1                                                                    |



|        |              |                                                                                                                |
|--------|--------------|----------------------------------------------------------------------------------------------------------------|
| 5475   | PPEF1        | protein phosphatase, EF-hand calcium binding domain 1                                                          |
| 57447  | NDRG2        | NDRG family member 2                                                                                           |
| 83787  | ARMC10       | armadillo repeat containing 10                                                                                 |
| 5184   | PEPD         | peptidase D                                                                                                    |
| 57185  | NIPAL3       | NIPA-like domain containing 3                                                                                  |
| 25873  | RPL36        | ribosomal protein L36                                                                                          |
| 7169   | TPM2         | tropomyosin 2 (beta)                                                                                           |
| 286527 | TMSB15B      | thymosin beta 15B                                                                                              |
| 148    | ADRA1A       | adrenergic, alpha-1A-, receptor                                                                                |
| 10184  | LHFPL2       | lipoma HMGIC fusion partner-like 2                                                                             |
| 10579  | TACC2        | transforming, acidic coiled-coil containing protein 2                                                          |
| 913    | CD1E         | CD1e molecule                                                                                                  |
| 399665 | FAM102A      | family with sequence similarity 102, member A                                                                  |
| 51205  | ACP6         | acid phosphatase 6, lysophosphatidic                                                                           |
| 5478   | PPIA         | peptidylprolyl isomerase A (cyclophilin A)                                                                     |
| 9783   | RIMS3        | regulating synaptic membrane exocytosis 3                                                                      |
| 2621   | GAS6         | growth arrest-specific 6                                                                                       |
| 84875  | PARP10       | poly (ADP-ribose) polymerase family, member 10                                                                 |
| 728743 | LOC728743    | similar to GLI-Kruppel family member HKR1                                                                      |
| 90060  | CCDC120      | coiled-coil domain containing 120                                                                              |
| 80115  | BAIAP2L2     | BAI1-associated protein 2-like 2                                                                               |
| 4882   | NPR2         | natriuretic peptide receptor B/guanylate cyclase B (atrionatriuretic peptide receptor B)                       |
| 152926 | PPM1K        | protein phosphatase, Mg2+/Mn2+ dependent, 1K                                                                   |
| 27090  | ST6GALNAC4   | ST6 (alpha-N-acetyl-neuraminyll-2,3-beta-galactosyl-1,3)-N-acetylgalactosaminide alpha-2,6-sialyltransferase 4 |
| 11149  | BVES         | blood vessel epicardial substance                                                                              |
| 51474  | LIMA1        | LIM domain and actin binding 1                                                                                 |
| 999    | CDH1         | cadherin 1, type 1, E-cadherin (epithelial)                                                                    |
| 89932  | PAPLN        | papilin, proteoglycan-like sulfated glycoprotein                                                               |
| 8724   | SNX3         | sorting nexin 3                                                                                                |
| 1969   | EPHA2        | EPH receptor A2                                                                                                |
| 3009   | HIST1H1B     | histone cluster 1, H1b                                                                                         |
| 143941 | TTC36        | tetratricopeptide repeat domain 36                                                                             |
| 921    | CD5          | CD5 molecule                                                                                                   |
| 2273   | FHL1         | four and a half LIM domains 1                                                                                  |
| 494513 | DFNB59       | deafness, autosomal recessive 59                                                                               |
| 84174  | SLA2         | Src-like-adaptor 2                                                                                             |
| 23189  | KANK1        | KN motif and ankyrin repeat domains 1                                                                          |
| 638    | BIK          | BCL2-interacting killer (apoptosis-inducing)                                                                   |
| 81571  | NCRNA00287   | non-protein coding RNA 287                                                                                     |
| 28951  | TRIB2        | tribbles homolog 2 (Drosophila)                                                                                |
| 6242   | RTKN         | rhotekin                                                                                                       |
| 23166  | STAB1        | stabilin 1                                                                                                     |
| 9333   | TGM5         | transglutaminase 5                                                                                             |
| 158405 | KIAA1958     | KIAA1958                                                                                                       |
| 79801  | SHCBP1       | SHC SH2-domain binding protein 1                                                                               |
| 10810  | WASF3        | WAS protein family, member 3                                                                                   |
| 151888 | BTLA         | B and T lymphocyte associated                                                                                  |
| 25894  | PLEKHG4      | pleckstrin homology domain containing, family G (with RhoGef domain) member 4                                  |
| 374650 | GOLGA6L5     | golgin A6 family-like 5 (pseudogene)                                                                           |
| 152137 | CCDC50       | coiled-coil domain containing 50                                                                               |
| 10253  | SPRY2        | sprouty homolog 2 (Drosophila)                                                                                 |
| 79656  | BEND5        | BEN domain containing 5                                                                                        |
| 639    | PRDM1        | PR domain containing 1, with ZNF domain                                                                        |
| 641649 | TMEM91       | transmembrane protein 91                                                                                       |
| 5624   | PROC         | protein C (inactivator of coagulation factors Va and VIIIa)                                                    |
| 80237  | ELL3         | elongation factor RNA polymerase II-like 3                                                                     |
| 339390 | CLEC4G       | C-type lectin domain family 4, member G                                                                        |
| 55088  | C10orf118    | chromosome 10 open reading frame 118                                                                           |
| 25854  | FAM149A      | family with sequence similarity 149, member A                                                                  |
| 57211  | GPR126       | G protein-coupled receptor 126                                                                                 |
| 51268  | PIPOX        | pipecolic acid oxidase                                                                                         |
| 4925   | NUCB2        | nucleobindin 2                                                                                                 |
| 389634 | LOC389634    | hypothetical LOC389634                                                                                         |
| 53831  | GPR84        | G protein-coupled receptor 84                                                                                  |
| 344148 | NCKAP5       | NCK-associated protein 5                                                                                       |
| 147495 | APCDD1       | adenomatosis polyposis coli down-regulated 1                                                                   |
| 5251   | PHEX         | phosphate regulating endopeptidase homolog, X-linked                                                           |
| 79762  | C1orf115     | chromosome 1 open reading frame 115                                                                            |
| 2199   | FBLN2        | fibulin 2                                                                                                      |
| 653509 | SFTPA1       | surfactant protein A1                                                                                          |
| 7098   | TLR3         | toll-like receptor 3                                                                                           |
| 4175   | MCM6         | minichromosome maintenance complex component 6                                                                 |
| 653567 | FAM23A       | family with sequence similarity 23, member A                                                                   |
| 79007  | DBNDD1       | dysbindin (dystrobrevin binding protein 1) domain containing 1                                                 |
| 5168   | ENPP2        | ectonucleotide pyrophosphatase/phosphodiesterase 2                                                             |
| 81552  | VOPP1        | vesicular, overexpressed in cancer, prosurvival protein 1                                                      |
| 2833   | CXCR3        | chemokine (C-X-C motif) receptor 3                                                                             |
| 55964  | SEPT3        | septin 3                                                                                                       |
| 8506   | CNTNAP1      | contactin associated protein 1                                                                                 |
| 23122  | CLASP2       | cytoplasmic linker associated protein 2                                                                        |
| 1573   | CYP2J2       | cytochrome P450, family 2, subfamily J, polypeptide 2                                                          |
| 3486   | IGFBP3       | insulin-like growth factor binding protein 3                                                                   |
| 11326  | VSIG4        | V-set and immunoglobulin domain containing 4                                                                   |
| 165    | AEBP1        | AE binding protein 1                                                                                           |
| 9892   | SNAP91       | synaptosomal-associated protein, 91kDa homolog (mouse)                                                         |
| 55728  | N4BP2        | NEDD4 binding protein 2                                                                                        |
| 946    | SIGLEC6      | sialic acid binding Ig-like lectin 6                                                                           |
| 10911  | UTS2         | urotensin 2                                                                                                    |
| 282618 | IL29         | interleukin 29 (interferon, lambda 1)                                                                          |
| 2781   | GNAZ         | guanine nucleotide binding protein (G protein), alpha z polypeptide                                            |
| 222161 | DKFZP5861420 | hypothetical protein DKFZp5861420                                                                              |
| 81620  | CDT1         | chromatin licensing and DNA replication factor 1                                                               |
| 6689   | SP1B         | Spi-B transcription factor (Spi-1/PU.1 related)                                                                |
| 116028 | C16orf75     | chromosome 16 open reading frame 75                                                                            |
| 152485 | ZNF827       | zinc finger protein 827                                                                                        |

|           |              |                                                                                                |
|-----------|--------------|------------------------------------------------------------------------------------------------|
| 10572     | SIVA1        | SIVA1, apoptosis-inducing factor                                                               |
| 1501      | CTNND2       | catenin (cadherin-associated protein), delta 2 (neural plakophilin-related arm-repeat protein) |
| 1593      | CYP27A1      | cytochrome P450, family 27, subfamily A, polypeptide 1                                         |
| 257144    | GCET2        | germinal center expressed transcript 2                                                         |
| 84433     | CARD11       | caspase recruitment domain family, member 11                                                   |
| 1428      | CRYM         | crystallin, mu                                                                                 |
| 132884    | EVC2         | Ellis van Creveld syndrome 2                                                                   |
| 55691     | FRMD4A       | FERM domain containing 4A                                                                      |
| 5358      | PLS3         | plastin 3                                                                                      |
| 6347      | CCL2         | chemokine (C-C motif) ligand 2                                                                 |
| 4130      | MAP1A        | microtubule-associated protein 1A                                                              |
| 387882    | C12orf75     | chromosome 12 open reading frame 75                                                            |
| 8322      | FZD4         | frizzled homolog 4 (Drosophila)                                                                |
| 55266     | TMEM19       | transmembrane protein 19                                                                       |
| 79705     | LRRK1        | leucine-rich repeat kinase 1                                                                   |
| 89765     | RSPH1        | radial spoke head 1 homolog (Chlamydomonas)                                                    |
| 3512      | IGJ          | immunoglobulin J polypeptide, linker protein for immunoglobulin alpha and mu polypeptides      |
| 1373      | CPS1         | carbamoyl-phosphate synthase 1, mitochondrial                                                  |
| 4320      | MMP11        | matrix metalloproteinase 11 (stromelysin 3)                                                    |
| 50489     | CD207        | CD207 molecule, langerin                                                                       |
| 55068     | ENOX1        | ecto-NOX disulfide-thiol exchanger 1                                                           |
| 64084     | CLSTN2       | calysntenin 2                                                                                  |
| 25925     | ZNF521       | zinc finger protein 521                                                                        |
| 22915     | MMRN1        | multimerin 1                                                                                   |
| 9957      | HS3ST1       | heparan sulfate (glucosamine) 3-O-sulfotransferase 1                                           |
| 5129      | CDK18        | cyclin-dependent kinase 18                                                                     |
| 116159    | CYYR1        | cysteine/tyrosine-rich 1                                                                       |
| 728715    | LOC728715    | ovostatin homolog 2-like                                                                       |
| 7710      | ZNF154       | zinc finger protein 154                                                                        |
| 79971     | WLS          | wntless homolog (Drosophila)                                                                   |
| 84057     | MND1         | meiotic nuclear divisions 1 homolog (S. cerevisiae)                                            |
| 4923      | NTSR1        | neurotensin receptor 1 (high affinity)                                                         |
| 165140    | OXER1        | oxoeicosanoid (OXE) receptor 1                                                                 |
| 170482    | CLEC4C       | C-type lectin domain family 4, member C                                                        |
| 23705     | CADM1        | cell adhesion molecule 1                                                                       |
| 5754      | PTK7         | PTK7 protein tyrosine kinase 7                                                                 |
| 8836      | GGH          | gamma-glutamyl hydrolase (conjugase, folylpolyglutamylyl hydrolase)                            |
| 30835     | CD209        | CD209 molecule                                                                                 |
| 3581      | IL9R         | interleukin 9 receptor                                                                         |
| 163702    | IL28RA       | interleukin 28 receptor, alpha (interferon, lambda receptor)                                   |
| 199731    | CADM4        | cell adhesion molecule 4                                                                       |
| 55655     | NLRP2        | NLR family, pyrin domain containing 2                                                          |
| 26022     | TMEM98       | transmembrane protein 98                                                                       |
| 3741      | KCNA5        | potassium voltage-gated channel, shaker-related subfamily, member 5                            |
| 116449    | CLNK         | cytokine-dependent hematopoietic cell linker                                                   |
| 100505650 | LOC100505650 | hypothetical LOC100505650                                                                      |
| 58499     | ZNF462       | zinc finger protein 462                                                                        |
| 219902    | TMEM136      | transmembrane protein 136                                                                      |
| 3852      | KRT5         | keratin 5                                                                                      |
| 22837     | COBL1        | COBL-like 1                                                                                    |
| 83988     | NCALD        | neurocalcin delta                                                                              |
| 2047      | EPHB1        | EPH receptor B1                                                                                |
| 55653     | BCAS4        | breast carcinoma amplified sequence 4                                                          |
| 8406      | SRPX         | sushi-repeat containing protein, X-linked                                                      |
| 113451    | ADC          | arginine decarboxylase                                                                         |
| 8115      | TCL1A        | T-cell leukemia/lymphoma 1A                                                                    |
| 1000      | CDH2         | cadherin 2, type 1, N-cadherin (neuronal)                                                      |
| 2213      | FCGR2B       | Fc fragment of IgG, low affinity IIb, receptor (CD32)                                          |
| 56961     | SHD          | Src homology 2 domain containing transforming protein D                                        |
| 91319     | DERL3        | Der1-like domain family, member 3                                                              |
| 29993     | PACSIN1      | protein kinase C and casein kinase substrate in neurons 1                                      |
| 2882      | GPX7         | glutathione peroxidase 7                                                                       |
| 83716     | CRISPLD2     | cysteine-rich secretory protein LCCL domain containing 2                                       |
| 445328    | ARHGEF35     | Rho guanine nucleotide exchange factor (GEF) 35                                                |
| 22874     | PLEKHA6      | pleckstrin homology domain containing, family A member 6                                       |
| 343990    | C2orf55      | chromosome 2 open reading frame 55                                                             |
| 23316     | CUX2         | cut-like homeobox 2                                                                            |
| 389816    | LRRRC26      | leucine rich repeat containing 26                                                              |
| 153769    | SH3RF2       | SH3 domain containing ring finger 2                                                            |
| 1815      | DRD4         | dopamine receptor D4                                                                           |
| 23205     | ACSBG1       | acyl-CoA synthetase bubblegum family member 1                                                  |
| 54836     | BSPRY        | B-box and SPRY domain containing                                                               |
| 5368      | PNOC         | prepronociceptin                                                                               |
| 5730      | PTGDS        | prostaglandin D2 synthase 21kDa (brain)                                                        |
| 1903      | S1PR3        | sphingosine-1-phosphate receptor 3                                                             |
| 434       | ASIP         | agouti signaling protein                                                                       |

**pDC (upregulated genes)**

| ENTREZ ID | Gene Symbol | Gene Name                                                                                              |
|-----------|-------------|--------------------------------------------------------------------------------------------------------|
| 3002      | GZMB        | granzyme B (granzyme 2, cytotoxic T-lymphocyte-associated serine esterase 1)                           |
| 29993     | PACSIN1     | protein kinase C and casein kinase substrate in neurons 1                                              |
| 2317      | FLNB        | filamin B, beta                                                                                        |
| 89932     | PAPLN       | papilin, proteoglycan-like sulfated glycoprotein                                                       |
| 57026     | PDXP        | pyridoxal (pyridoxine, vitamin B6) phosphatase                                                         |
| 2788      | GNG7        | guanine nucleotide binding protein (G protein), gamma 7                                                |
| 5730      | PTGDS       | prostaglandin D2 synthase 21kDa (brain)                                                                |
| 23231     | SEL1L3      | sel-1 suppressor of lin-12-like 3 (C. elegans)                                                         |
| 22837     | COBL1       | COBL-like 1                                                                                            |
| 163702    | IL28RA      | interleukin 28 receptor, alpha (interferon, lambda receptor)                                           |
| 221188    | GPR114      | G protein-coupled receptor 114                                                                         |
| 5176      | SERPINF1    | serpin peptidase inhibitor, clade F (alpha-2 antiplasmin, pigment epithelium derived factor), member 1 |
| 165       | AEBP1       | AE binding protein 1                                                                                   |
| 29919     | C18orf8     | chromosome 18 open reading frame 8                                                                     |
| 2833      | CXCR3       | chemokine (C-X-C motif) receptor 3                                                                     |
| 55214     | LEPREL1     | leprecan-like 1                                                                                        |

|        |            |                                                                                                              |
|--------|------------|--------------------------------------------------------------------------------------------------------------|
| 51754  | TMEM8B     | transmembrane protein 8B                                                                                     |
| 8644   | AKR1C3     | aldo-keto reductase family 1, member C3 (3-alpha hydroxysteroid dehydrogenase, type II)                      |
| 10184  | LHFPL2     | lipoma HMGIC fusion partner-like 2                                                                           |
| 3665   | IRF7       | interferon regulatory factor 7                                                                               |
| 3741   | KCNA5      | potassium voltage-gated channel, shaker-related subfamily, member 5                                          |
| 7169   | TPM2       | tropomyosin 2 (beta)                                                                                         |
| 8408   | ULK1       | unc-51-like kinase 1 (C. elegans)                                                                            |
| 23390  | ZDHHC17    | zinc finger, DHHC-type containing 17                                                                         |
| 51237  | MZB1       | marginal zone B and B1 cell-specific protein                                                                 |
| 9783   | RIMS3      | regulating synaptic membrane exocytosis 3                                                                    |
| 170482 | CLEC4C     | C-type lectin domain family 4, member C                                                                      |
| 84433  | CARD11     | caspace recruitment domain family, member 11                                                                 |
| 1428   | CRYM       | crystallin, mu                                                                                               |
| 1601   | DAB2       | disabled homolog 2, mitogen-responsive phosphoprotein (Drosophila)                                           |
| 2047   | EPHB1      | EPH receptor B1                                                                                              |
| 387882 | C12orf75   | chromosome 12 open reading frame 75                                                                          |
| 434    | ASIP       | agouti signaling protein                                                                                     |
| 23316  | CUX2       | cut-like homeobox 2                                                                                          |
| 5624   | PROC       | protein C (inactivator of coagulation factors Va and VIIIa)                                                  |
| 9637   | FEZ2       | fasciculation and elongation protein zeta 2 (zygin II)                                                       |
| 4320   | MMP11      | matrix metalloproteinase 11 (stromelysin 3)                                                                  |
| 57559  | STAMBPL1   | STAM binding protein-like 1                                                                                  |
| 4925   | NUCB2      | nucleobindin 2                                                                                               |
| 23677  | SH3BP4     | SH3-domain binding protein 4                                                                                 |
| 1743   | DLST       | dihydrolipoamide S-succinyltransferase (E2 component of 2-oxo-glutarate complex)                             |
| 51655  | RASD1      | RAS, dexamethasone-induced 1                                                                                 |
| 999    | CDH1       | cadherin 1, type 1, E-cadherin (epithelial)                                                                  |
| 5519   | PPP2R1B    | protein phosphatase 2, regulatory subunit A, beta                                                            |
| 389816 | LRRC26     | leucine rich repeat containing 26                                                                            |
| 7915   | ALDH5A1    | aldehyde dehydrogenase 5 family, member A1                                                                   |
| 90313  | TP53I13    | tumor protein p53 inducible protein 13                                                                       |
| 54806  | AHI1       | Abelson helper integration site 1                                                                            |
| 4130   | MAP1A      | microtubule-associated protein 1A                                                                            |
| 3925   | STMN1      | stathmin 1                                                                                                   |
| 54836  | BSPRY      | B-box and SPRY domain containing                                                                             |
| 113179 | ADAT3      | adenosine deaminase, tRNA-specific 3, TAD3 homolog (S. cerevisiae)                                           |
| 84875  | PARP10     | poly (ADP-ribose) polymerase family, member 10                                                               |
| 8115   | TCL1A      | T-cell leukemia/lymphoma 1A                                                                                  |
| 115294 | PCMTD1     | protein-L-isoaspartate (D-aspartate) O-methyltransferase domain containing 1                                 |
| 55086  | CXorf57    | chromosome X open reading frame 57                                                                           |
| 1602   | DACH1      | dachshund homolog 1 (Drosophila)                                                                             |
| 7976   | FZD3       | frizzled homolog 3 (Drosophila)                                                                              |
| 2882   | GPX7       | glutathione peroxidase 7                                                                                     |
| 6484   | ST3GAL4    | ST3 beta-galactoside alpha-2,3-sialyltransferase 4                                                           |
| 23205  | ACSBG1     | acyl-CoA synthetase bubblegum family member 1                                                                |
| 9623   | TCL1B      | T-cell leukemia/lymphoma 1B                                                                                  |
| 8481   | OFD1       | oral-facial-digital syndrome 1                                                                               |
| 3512   | IGJ        | immunoglobulin J polypeptide, linker protein for immunoglobulin alpha and mu polypeptides                    |
| 860    | RUNX2      | runt-related transcription factor 2                                                                          |
| 56961  | SHD        | Src homology 2 domain containing transforming protein D                                                      |
| 116159 | CYYR1      | cysteine/tyrosine-rich 1                                                                                     |
| 26003  | GORASP2    | golgi reassembly stacking protein 2, 55kDa                                                                   |
| 79690  | GAL3ST4    | galactose-3-O-sulfotransferase 4                                                                             |
| 1633   | DCK        | deoxycytidine kinase                                                                                         |
| 79713  | TMEM149    | transmembrane protein 149                                                                                    |
| 4311   | MME        | membrane metallo-endopeptidase                                                                               |
| 27143  | KIAA1274   | KIAA1274                                                                                                     |
| 55770  | EXOC2      | exocyst complex component 2                                                                                  |
| 4209   | MEF2D      | myocyte enhancer factor 2D                                                                                   |
| 113451 | ADC        | arginine decarboxylase                                                                                       |
| 81571  | NCRNA00287 | non-protein coding RNA 287                                                                                   |
| 26002  | MOXD1      | monooxygenase, DBH-like 1                                                                                    |
| 587    | BCAT2      | branched chain amino-acid transaminase 2, mitochondrial                                                      |
| 10113  | PREB       | prolactin regulatory element binding                                                                         |
| 7226   | TRPM2      | transient receptor potential cation channel, subfamily M, member 2                                           |
| 27352  | SGSM3      | small G protein signaling modulator 3                                                                        |
| 84707  | BEX2       | brain expressed X-linked 2                                                                                   |
| 54207  | KCNK10     | potassium channel, subfamily K, member 10                                                                    |
| 23592  | LEMD3      | LEM domain containing 3                                                                                      |
| 2273   | FHL1       | four and a half LIM domains 1                                                                                |
| 29115  | SAP30BP    | SAP30 binding protein                                                                                        |
| 10572  | SIVA1      | SIVA1, apoptosis-inducing factor                                                                             |
| 64764  | CREB3L2    | cAMP responsive element binding protein 3-like 2                                                             |
| 283673 | NCRNA00277 | non-protein coding RNA 277                                                                                   |
| 57576  | KIF17      | kinesin family member 17                                                                                     |
| 22915  | MMRN1      | multimerin 1                                                                                                 |
| 221322 | C6orf170   | chromosome 6 open reading frame 170                                                                          |
| 121053 | C12orf45   | chromosome 12 open reading frame 45                                                                          |
| 2529   | FUT7       | fucosyltransferase 7 (alpha (1,3) fucosyltransferase)                                                        |
| 4926   | NUMA1      | nuclear mitotic apparatus protein 1                                                                          |
| 7434   | VIPR2      | vasoactive intestinal peptide receptor 2                                                                     |
| 92922  | CCDC102A   | coiled-coil domain containing 102A                                                                           |
| 199731 | CADM4      | cell adhesion molecule 4                                                                                     |
| 27090  | ST6GALNAC4 | ST6 (alpha-N-acetylneuraminyl-2,3-beta-galactosyl-1,3)-N-acetylgalactosaminide alpha-2,6-sialyltransferase 4 |
| 23234  | DNAJC9     | DnaJ (Hsp40) homolog, subfamily C, member 9                                                                  |
| 145508 | C14orf145  | chromosome 14 open reading frame 145                                                                         |
| 55624  | POMGNT1    | protein O-linked mannose beta1,2-N-acetylglucosaminyltransferase                                             |
| 25994  | HIGD1A     | HIG1 hypoxia inducible domain family, member 1A                                                              |
| 57185  | NIPAL3     | NIPA-like domain containing 3                                                                                |
| 84969  | TOX2       | TOX high mobility group box family member 2                                                                  |
| 29760  | BLNK       | B-cell linker                                                                                                |
| 29927  | SEC61A1    | Sec61 alpha 1 subunit (S. cerevisiae)                                                                        |
| 222166 | C7orf41    | chromosome 7 open reading frame 41                                                                           |
| 157285 | SGK223     | homolog of rat pragra of Rnd2                                                                                |
| 501    | ALDH7A1    | aldehyde dehydrogenase 7 family, member A1                                                                   |

|           |               |                                                                                                                          |
|-----------|---------------|--------------------------------------------------------------------------------------------------------------------------|
| 54442     | KCTD5         | potassium channel tetramerisation domain containing 5                                                                    |
| 4953      | ODC1          | ornithine decarboxylase 1                                                                                                |
| 9588      | PRDX6         | peroxiredoxin 6                                                                                                          |
| 5168      | ENPP2         | ectonucleotide pyrophosphatase/phosphodiesterase 2                                                                       |
| 3682      | ITGAE         | integrin, alpha E (antigen CD103, human mucosal lymphocyte antigen 1; alpha polypeptide)                                 |
| 7710      | ZNF154        | zinc finger protein 154                                                                                                  |
| 55830     | GLT8D1        | glycosyltransferase 8 domain containing 1                                                                                |
| 91319     | DERL3         | Der1-like domain family, member 3                                                                                        |
| 23242     | COBL          | cordon-bleu homolog (mouse)                                                                                              |
| 152137    | CCDC50        | coiled-coil domain containing 50                                                                                         |
| 84171     | LOXL4         | lysyl oxidase-like 4                                                                                                     |
| 80326     | WNT10A        | wingless-type MMTV integration site family, member 10A                                                                   |
| 9855      | FARP2         | FERM, RhoGEF and pleckstrin domain protein 2                                                                             |
| 10858     | CYP46A1       | cytochrome P450, family 46, subfamily A, polypeptide 1                                                                   |
| 9973      | CCS           | copper chaperone for superoxide dismutase                                                                                |
| 9806      | SPOCK2        | sparc/osteonectin, cwcv and kazal-like domains proteoglycan (testican) 2                                                 |
| 725       | C4BPB         | complement component 4 binding protein, beta                                                                             |
| 11339     | OIP5          | Opa interacting protein 5                                                                                                |
| 29801     | ZDHHC8        | zinc finger, DHHC-type containing 8                                                                                      |
| 80183     | C13orf18      | chromosome 13 open reading frame 18                                                                                      |
| 64766     | S100BPB       | S100P binding protein                                                                                                    |
| 339983    | NAT8L         | N-acetyltransferase 8-like (GCN5-related, putative)                                                                      |
| 79567     | FAM65A        | family with sequence similarity 65, member A                                                                             |
| 84705     | GTPBP3        | GTP binding protein 3 (mitochondrial)                                                                                    |
| 54749     | EPDR1         | ependymin related protein 1 (zebrafish)                                                                                  |
| 78999     | LRFN4         | leucine rich repeat and fibronectin type III domain containing 4                                                         |
| 5297      | PI4KA         | phosphatidylinositol 4-kinase, catalytic, alpha                                                                          |
| 6925      | TCF4          | transcription factor 4                                                                                                   |
| 9709      | HERPUD1       | homocysteine-inducible, endoplasmic reticulum stress-inducible, ubiquitin-like domain member 1                           |
| 4041      | LRP5          | low density lipoprotein receptor-related protein 5                                                                       |
| 55083     | KIF26B        | kinesin family member 26B                                                                                                |
| 8473      | OGT           | O-linked N-acetylglucosamine (GlcNAc) transferase (UDP-N-acetylglucosamine:polypeptide-N-acetylglucosaminyl transferase) |
| 550112    | LOC550112     | hypothetical LOC550112                                                                                                   |
| 2931      | GSK3A         | glycogen synthase kinase 3 alpha                                                                                         |
| 255631    | COL24A1       | collagen, type XXIV, alpha 1                                                                                             |
| 90060     | CCDC120       | coiled-coil domain containing 120                                                                                        |
| 8237      | USP11         | ubiquitin specific peptidase 11                                                                                          |
| 493       | ATP2B4        | ATPase, Ca <sup>++</sup> transporting, plasma membrane 4                                                                 |
| 23189     | KANK1         | KN motif and ankyrin repeat domains 1                                                                                    |
| 6196      | RPS6KA2       | ribosomal protein S6 kinase, 90kDa, polypeptide 2                                                                        |
| 4799      | NFX1          | nuclear transcription factor, X-box binding 1                                                                            |
| 9725      | TMEM63A       | transmembrane protein 63A                                                                                                |
| 9537      | TP53I11       | tumor protein p53 inducible protein 11                                                                                   |
| 3852      | KRT5          | keratin 5                                                                                                                |
| 728715    | LOC728715     | ovostatin homolog 2-like                                                                                                 |
| 116238    | TLCD1         | TLC domain containing 1                                                                                                  |
| 4175      | MCM6          | minichromosome maintenance complex component 6                                                                           |
| 27004     | TCL6          | T-cell leukemia/lymphoma 6 (non-protein coding)                                                                          |
| 91010     | FMNL3         | formin-like 3                                                                                                            |
| 25894     | PLEKHG4       | pleckstrin homology domain containing, family G (with RhoGef domain) member 4                                            |
| 924       | CD7           | CD7 molecule                                                                                                             |
| 28392     | IGHV4-59      | immunoglobulin heavy variable 4-59                                                                                       |
| 729786    | GOLGA8C       | golgin A8 family, member C                                                                                               |
| 11320     | MGAT4A        | mannosyl (alpha-1,3-)-glycoprotein beta-1,4-N-acetylglucosaminyltransferase, isozyme A                                   |
| 6000      | RGS7          | regulator of G-protein signaling 7                                                                                       |
| 728743    | LOC728743     | similar to GLI-Kruppel family member HKR1                                                                                |
| 81539     | SLC38A1       | solute carrier family 38, member 1                                                                                       |
| 56478     | EIF4ENIF1     | eukaryotic translation initiation factor 4E nuclear import factor 1                                                      |
| 6335      | SCN9A         | sodium channel, voltage-gated, type IX, alpha subunit                                                                    |
| 5457      | POU4F1        | POU class 4 homeobox 1                                                                                                   |
| 1815      | DRD4          | dopamine receptor D4                                                                                                     |
| 81606     | LBH           | limb bud and heart development homolog (mouse)                                                                           |
| 375       | ARF1          | ADP-ribosylation factor 1                                                                                                |
| 79805     | VASH2         | vasohibin 2                                                                                                              |
| 2055      | CLN8          | ceroid-lipofuscinosis, neuronal 8 (epilepsy, progressive with mental retardation)                                        |
| 56926     | NCLN          | nicalin                                                                                                                  |
| 55526     | DHTKD1        | dehydrogenase E1 and transketolase domain containing 1                                                                   |
| 55966     | AJAP1         | adherens junctions associated protein 1                                                                                  |
| 127262    | TPRG1L        | tumor protein p63 regulated 1-like                                                                                       |
| 1271      | CNTFR         | ciliary neurotrophic factor receptor                                                                                     |
| 347918    | EP400NL       | EP400 N-terminal like                                                                                                    |
| 22872     | SEC31A        | SEC31 homolog A (S. cerevisiae)                                                                                          |
| 221692    | PHACTR1       | phosphatase and actin regulator 1                                                                                        |
| 286256    | LCN12         | lipocalin 12                                                                                                             |
| 9601      | PDI4A         | protein disulfide isomerase family A, member 4                                                                           |
| 60673     | C12orf44      | chromosome 12 open reading frame 44                                                                                      |
| 8575      | PRKRA         | protein kinase, interferon-inducible double stranded RNA dependent activator                                             |
| 8506      | CNTNAP1       | contactin associated protein 1                                                                                           |
| 10009     | ZBTB33        | zinc finger and BTB domain containing 33                                                                                 |
| 23394     | ADNP          | activity-dependent neuroprotector homeobox                                                                               |
| 285268    | ZNF621        | zinc finger protein 621                                                                                                  |
| 89781     | HPS4          | Hermansky-Pudlak syndrome 4                                                                                              |
| 4047      | LSS           | lanosterol synthase (2,3-oxidosqualene-lanosterol cyclase)                                                               |
| 51104     | FAM108B1      | family with sequence similarity 108, member B1                                                                           |
| 23002     | DAAM1         | dishevelled associated activator of morphogenesis 1                                                                      |
| 222161    | DKFZP586I1420 | hypothetical protein DKFZp586I1420                                                                                       |
| 55342     | STRBP         | spermatid perinuclear RNA binding protein                                                                                |
| 51339     | DACT1         | dapper, antagonist of beta-catenin, homolog 1 (Xenopus laevis)                                                           |
| 9197      | SLC33A1       | solute carrier family 33 (acetyl-CoA transporter), member 1                                                              |
| 51257     | O2-Mar        | membrane-associated ring finger (C3HC4) 2                                                                                |
| 7728      | ZNF175        | zinc finger protein 175                                                                                                  |
| 64207     | IRF2BPL       | interferon regulatory factor 2 binding protein-like                                                                      |
| 23435     | TARDBP        | TAR DNA binding protein                                                                                                  |
| 100128242 | LOC100128242  | hypothetical LOC100128242                                                                                                |
| 51635     | DHRS7         | dehydrogenase/reductase (SDR family) member 7                                                                            |

|           |              |                                                                                                         |
|-----------|--------------|---------------------------------------------------------------------------------------------------------|
| 55266     | TMEM19       | transmembrane protein 19                                                                                |
| 3775      | KCNK1        | potassium channel, subfamily K, member 1                                                                |
| 4121      | MAN1A1       | mannosidase, alpha, class 1A, member 1                                                                  |
| 2819      | GPD1         | glycerol-3-phosphate dehydrogenase 1 (soluble)                                                          |
| 51239     | ANKRD39      | ankyrin repeat domain 39                                                                                |
| 5754      | PTK7         | PTK7 protein tyrosine kinase 7                                                                          |
| 7371      | UCK2         | uridine-cytidine kinase 2                                                                               |
| 8406      | SRPX         | sushi-repeat containing protein, X-linked                                                               |
| 7392      | USF2         | upstream transcription factor 2, c-fos interacting                                                      |
| 8836      | GGH          | gamma-glutamyl hydrolase (conjugase, foylypolygammaglutamyl hydrolase)                                  |
| 11006     | LILRB4       | leukocyte immunoglobulin-like receptor, subfamily B (with TM and ITIM domains), member 4                |
| 29903     | CCDC106      | coiled-coil domain containing 106                                                                       |
| 56061     | UBFD1        | ubiquitin family domain containing 1                                                                    |
| 3338      | DNAJC4       | DnaJ (Hsp40) homolog, subfamily C, member 4                                                             |
| 5251      | PHEX         | phosphate regulating endopeptidase homolog, X-linked                                                    |
| 26249     | KLHL3        | kelch-like 3 (Drosophila)                                                                               |
| 9366      | RAB9BP1      | RAB9B, member RAS oncogene family pseudogene 1                                                          |
| 9991      | ROD1         | ROD1 regulator of differentiation 1 (S. pombe)                                                          |
| 150159    | NHEDC1       | Na <sup>+</sup> /H <sup>+</sup> exchanger domain containing 1                                           |
| 22929     | SEPHS1       | selenophosphate synthetase 1                                                                            |
| 8392      | OR3A3        | olfactory receptor, family 3, subfamily A, member 3                                                     |
| 922       | CD5L         | CD5 molecule-like                                                                                       |
| 9963      | SLC23A1      | solute carrier family 23 (nucleobase transporters), member 1                                            |
| 6734      | SRPR         | signal recognition particle receptor (docking protein)                                                  |
| 284459    | HKR1         | HKR1, GLI-Kruppel zinc finger family member                                                             |
| 54106     | TLR9         | toll-like receptor 9                                                                                    |
| 283932    | NCRNA00095   | non-protein coding RNA 95                                                                               |
| 286527    | TMSB15B      | thymosin beta 15B                                                                                       |
| 9044      | BTAF1        | BTAF1 RNA polymerase II, B-TFIIID transcription factor-associated, 170kDa (Mot1 homolog, S. cerevisiae) |
| 80765     | STARD5       | STAR-related lipid transfer (START) domain containing 5                                                 |
| 9501      | RPH3AL       | rabphilin 3A-like (without C2 domains)                                                                  |
| 54843     | SYTL2        | synaptotagmin-like 2                                                                                    |
| 6574      | SLC20A1      | solute carrier family 20 (phosphate transporter), member 1                                              |
| 140686    | WFDC3        | WAP four-disulfide core domain 3                                                                        |
| 8425      | LTBP4        | latent transforming growth factor beta binding protein 4                                                |
| 54872     | PIGG         | phosphatidylinositol glycan anchor biosynthesis, class G                                                |
| 440423    | SUZ12P       | suppressor of zeste 12 homolog pseudogene                                                               |
| 5425      | POLD2        | polymerase (DNA directed), delta 2, regulatory subunit 50kDa                                            |
| 79791     | FBXO31       | F-box protein 31                                                                                        |
| 165055    | CCDC138      | coiled-coil domain containing 138                                                                       |
| 10263     | CDK2AP2      | cyclin-dependent kinase 2 associated protein 2                                                          |
| 223082    | ZNRF2        | zinc and ring finger 2                                                                                  |
| 53841     | CDHR5        | cadherin-related family member 5                                                                        |
| 51678     | MPP6         | membrane protein, palmitoylated 6 (MAGUK p55 subfamily member 6)                                        |
| 9727      | RAB11FIP3    | RAB11 family interacting protein 3 (class II)                                                           |
| 22955     | SCMH1        | sex comb on midleg homolog 1 (Drosophila)                                                               |
| 196394    | AMN1         | antagonist of mitotic exit network 1 homolog (S. cerevisiae)                                            |
| 286102    | TMED10P1     | transmembrane emp24-like trafficking protein 10 (yeast) pseudogene 1                                    |
| 54869     | EPS8L1       | EPS8-like 1                                                                                             |
| 51303     | FKBP11       | FK506 binding protein 11, 19 kDa                                                                        |
| 6689      | SPIB         | Spi-B transcription factor (Spi-1/PU.1 related)                                                         |
| 65985     | AACS         | acetoacetyl-CoA synthetase                                                                              |
| 22807     | IKZF2        | IKAROS family zinc finger 2 (Helios)                                                                    |
| 171558    | PTCRA        | pre T-cell antigen receptor alpha                                                                       |
| 10681     | GNB5         | guanine nucleotide binding protein (G protein), beta 5                                                  |
| 6242      | RTKN         | rhotekin                                                                                                |
| 5208      | PFKFB2       | 6-phosphofructo-2-kinase/fructose-2,6-biphosphatase 2                                                   |
| 66035     | SLC2A11      | solute carrier family 2 (facilitated glucose transporter), member 11                                    |
| 6117      | RPA1         | replication protein A1, 70kDa                                                                           |
| 23157     | SEPT6        | septin 6                                                                                                |
| 359948    | IRF2BP2      | interferon regulatory factor 2 binding protein 2                                                        |
| 142678    | MIB2         | mindbomb homolog 2 (Drosophila)                                                                         |
| 80305     | TRABD        | TraB domain containing                                                                                  |
| 80063     | ATF7IP2      | activating transcription factor 7 interacting protein 2                                                 |
| 23111     | SPG20        | spastic paraplegia 20 (Troyer syndrome)                                                                 |
| 642938    | FAM196A      | family with sequence similarity 196, member A                                                           |
| 124590    | USH1G        | Usher syndrome 1G (autosomal recessive)                                                                 |
| 157567    | ANKRD46      | ankyrin repeat domain 46                                                                                |
| 10959     | TMED2        | transmembrane emp24 domain trafficking protein 2                                                        |
| 152926    | PPM1K        | protein phosphatase, Mg <sup>2+</sup> /Mn <sup>2+</sup> dependent, 1K                                   |
| 10985     | GCN1L1       | GCN1 general control of amino-acid synthesis 1-like 1 (yeast)                                           |
| 441024    | MTHFD2L      | methylenetetrahydrofolate dehydrogenase (NADP+ dependent) 2-like                                        |
| 54760     | PCK4         | proprotein convertase subtilisin/kexin type 4                                                           |
| 85026     | C9orf37      | chromosome 9 open reading frame 37                                                                      |
| 7570      | ZNF22        | zinc finger protein 22 (KOX 15)                                                                         |
| 79710     | MORC4        | MORC family CW-type zinc finger 4                                                                       |
| 81608     | FIP1L1       | FIP1 like 1 (S. cerevisiae)                                                                             |
| 55829     | SELS         | selenoprotein S                                                                                         |
| 115825    | WDFY2        | WD repeat and FYVE domain containing 2                                                                  |
| 26472     | PPP1R14B     | protein phosphatase 1, regulatory (inhibitor) subunit 14B                                               |
| 57577     | KIAA1407     | KIAA1407                                                                                                |
| 2205      | FCER1A       | Fc fragment of IgE, high affinity I, receptor for; alpha polypeptide                                    |
| 134       | ADORA1       | adenosine A1 receptor                                                                                   |
| 3703      | STT3A        | STT3, subunit of the oligosaccharyltransferase complex, homolog A (S. cerevisiae)                       |
| 7283      | TUBG1        | tubulin, gamma 1                                                                                        |
| 197335    | WDR90        | WD repeat domain 90                                                                                     |
| 84174     | SLA2         | Src-like adaptor 2                                                                                      |
| 9375      | TM9SF2       | transmembrane 9 superfamily member 2                                                                    |
| 55082     | ARGLU1       | arginine and glutamate rich 1                                                                           |
| 118       | ADD1         | adducin 1 (alpha)                                                                                       |
| 29803     | REPIN1       | replication initiator 1                                                                                 |
| 84617     | TUBB6        | tubulin, beta 6                                                                                         |
| 6302      | TSPAN31      | tetraspanin 31                                                                                          |
| 100133224 | LOC100133224 | hypothetical protein LOC100133224                                                                       |
| 23061     | TBC1D9B      | TBC1 domain family, member 9B (with GRAM domain)                                                        |

|           |              |                                                                                                               |
|-----------|--------------|---------------------------------------------------------------------------------------------------------------|
| 93663     | ARHGAP18     | Rho GTPase activating protein 18                                                                              |
| 11149     | BVES         | blood vessel epicardial substance                                                                             |
| 27175     | TUBG2        | tubulin, gamma 2                                                                                              |
| 51559     | NT5DC3       | 5'-nucleotidase domain containing 3                                                                           |
| 51060     | TXNDC12      | thioredoxin domain containing 12 (endoplasmic reticulum)                                                      |
| 57117     | INTS12       | integrator complex subunit 12                                                                                 |
| 23165     | NUP205       | nucleoporin 205kDa                                                                                            |
| 27128     | CYTH4        | cytohesin 4                                                                                                   |
| 710       | SERPING1     | serpin peptidase inhibitor, clade G (C1 inhibitor), member 1                                                  |
| 11164     | NUDT5        | nudix (nucleoside diphosphate linked moiety X)-type motif 5                                                   |
| 203197    | C9orf91      | chromosome 9 open reading frame 91                                                                            |
| 84080     | C16orf48     | chromosome 16 open reading frame 48                                                                           |
| 85451     | UNK          | unkempt homolog (Drosophila)                                                                                  |
| 5436      | POLR2G       | polymerase (RNA) II (DNA directed) polypeptide G                                                              |
| 8459      | TPST2        | tyrosylprotein sulfotransferase 2                                                                             |
| 81932     | HDH3         | haloacid dehalogenase-like hydrolase domain containing 3                                                      |
| 100288273 | LOC100288273 | hypothetical LOC100288273                                                                                     |
| 9744      | ACAP1        | ArfGAP with coiled-coil, ankyrin repeat and PH domains 1                                                      |
| 23030     | KDM4B        | lysine (K)-specific demethylase 4B                                                                            |
| 25915     | NDUFAF3      | NADH dehydrogenase (ubiquinone) 1 alpha subcomplex, assembly factor 3                                         |
| 29100     | TMEM208      | transmembrane protein 208                                                                                     |
| 1798      | DPAGT1       | dolichyl-phosphate (UDP-N-acetylglucosamine) N-acetylglucosaminophosphotransferase 1 (GlcNAc-1-P transferase) |
| 946       | SIGLEC6      | sialic acid binding Ig-like lectin 6                                                                          |
| 440       | ASNS         | asparagine synthetase (glutamine-hydrolyzing)                                                                 |
| 83941     | TM2D1        | TM2 domain containing 1                                                                                       |
| 5368      | PNOC         | prepronociceptin                                                                                              |
| 100506144 | LOC100506144 | hypothetical protein LOC100506144                                                                             |
| 122509    | IFI27L1      | interferon, alpha-inducible protein 27-like 1                                                                 |
| 92973     | LOC92973     | hypothetical LOC92973                                                                                         |
| 286367    | LOC286367    | FP944                                                                                                         |
| 25800     | SLC39A6      | solute carrier family 39 (zinc transporter), member 6                                                         |
| 57823     | SLAMF7       | SLAM family member 7                                                                                          |
| 55353     | LAPTM4B      | lysosomal protein transmembrane 4 beta                                                                        |
| 11340     | EXOSC8       | exosome component 8                                                                                           |
| 5424      | POLD1        | polymerase (DNA directed), delta 1, catalytic subunit 125kDa                                                  |
| 442421    | LOC442421    | hypothetical LOC442421                                                                                        |
| 57533     | TBC1D14      | TBC1 domain family, member 14                                                                                 |
| 64784     | CRTC3        | CREB regulated transcription coactivator 3                                                                    |
| 1803      | DPP4         | dipeptidyl-peptidase 4                                                                                        |
| 51011     | FAHD2A       | fumarylacetoacetate hydrolase domain containing 2A                                                            |
| 5496      | PPM1G        | protein phosphatase, Mg2+/Mn2+ dependent, 1G                                                                  |
| 5800      | PTPRO        | protein tyrosine phosphatase, receptor type, O                                                                |
| 60343     | FAM3A        | family with sequence similarity 3, member A                                                                   |
| 26354     | GNL3         | guanine nucleotide binding protein-like 3 (nucleolar)                                                         |
| 5274      | SERPINI1     | serpin peptidase inhibitor, clade I (neuroserpin), member 1                                                   |
| 1163      | CKS1B        | CDC28 protein kinase regulatory subunit 1B                                                                    |
| 5332      | PLCB4        | phospholipase C, beta 4                                                                                       |
| 57176     | VARS2        | valyl-tRNA synthetase 2, mitochondrial (putative)                                                             |
| 26512     | INTS6        | integrator complex subunit 6                                                                                  |
| 6558      | SLC12A2      | solute carrier family 12 (sodium/potassium/chloride transporters), member 2                                   |
| 3551      | IKBKB        | inhibitor of kappa light polypeptide gene enhancer in B-cells, kinase beta                                    |
| 642       | BLMH         | bleomycin hydrolase                                                                                           |
| 1394      | CRHR1        | corticotropin releasing hormone receptor 1                                                                    |
| 113878    | DTX2         | deltex homolog 2 (Drosophila)                                                                                 |
| 10090     | UST          | uronyl-2-sulfotransferase                                                                                     |
| 80758     | PRR7         | proline rich 7 (synaptic)                                                                                     |
| 56271     | BEX4         | brain expressed, X-linked 4                                                                                   |
| 755       | C21orf2      | chromosome 21 open reading frame 2                                                                            |
| 55748     | CNDP2        | CNDP dipeptidase 2 (metallopeptidase M20 family)                                                              |
| 11332     | ACOT7        | acyl-CoA thioesterase 7                                                                                       |
| 9692      | KIAA0391     | KIAA0391                                                                                                      |
| 343477    | HSP90B3P     | heat shock protein 90kDa beta (Grp94), member 3 (pseudogene)                                                  |
| 1969      | EPHA2        | EPH receptor A2                                                                                               |
| 6297      | SALL2        | sal-like 2 (Drosophila)                                                                                       |
| 5358      | PLS3         | plastin 3                                                                                                     |
| 4649      | MYO9A        | myosin IXA                                                                                                    |
| 151888    | BTLA         | B and T lymphocyte associated                                                                                 |
| 282763    | OR51B5       | olfactory receptor, family 51, subfamily B, member 5                                                          |
| 56922     | MCCC1        | methylcrotonoyl-CoA carboxylase 1 (alpha)                                                                     |
| 728975    | LOC728975    | hypothetical LOC728975                                                                                        |
| 2021      | ENDOG        | endonuclease G                                                                                                |
| 23158     | TBC1D9       | TBC1 domain family, member 9 (with GRAM domain)                                                               |
| 5747      | PTK2         | PTK2 protein tyrosine kinase 2                                                                                |
| 151313    | FAHD2B       | fumarylacetoacetate hydrolase domain containing 2B                                                            |
| 22820     | COPG         | coatamer protein complex, subunit gamma                                                                       |
| 79085     | SLC25A23     | solute carrier family 25 (mitochondrial carrier; phosphate carrier), member 23                                |
| 80212     | CCDC92       | coiled-coil domain containing 92                                                                              |
| 54897     | CASZ1        | castor zinc finger 1                                                                                          |
| 6622      | SNCA         | synuclein, alpha (non A4 component of amyloid precursor)                                                      |
| 131474    | CHCHD4       | coiled-coil-helix-coiled-coil-helix domain containing 4                                                       |
| 6202      | RPS8         | ribosomal protein S8                                                                                          |
| 60436     | TGIF2        | TGFB-induced factor homeobox 2                                                                                |
| 402       | ARL2         | ADP-ribosylation factor-like 2                                                                                |
| 109       | ADCY3        | adenylate cyclase 3                                                                                           |
| 9404      | LPXN         | leupaxin                                                                                                      |
| 196051    | PPAPDC1A     | phosphatidic acid phosphatase type 2 domain containing 1A                                                     |
| 3006      | HIST1H1C     | histone cluster 1, H1c                                                                                        |
| 2926      | GRSF1        | G-rich RNA sequence binding factor 1                                                                          |
| 79705     | LRRK1        | leucine-rich repeat kinase 1                                                                                  |
| 9978      | RBX1         | ring-box 1, E3 ubiquitin protein ligase                                                                       |
| 58505     | OSTC         | oligosaccharyltransferase complex subunit                                                                     |
| 147495    | APCDD1       | adenomatosis polyposis coli down-regulated 1                                                                  |
| 8883      | NAE1         | NEDD8 activating enzyme E1 subunit 1                                                                          |
| 5341      | PLEK         | pleckstrin                                                                                                    |
| 51114     | ZDHC9        | zinc finger, DHHC-type containing 9                                                                           |

|        |          |                                                                                         |
|--------|----------|-----------------------------------------------------------------------------------------|
| 2322   | FLT3     | fms-related tyrosine kinase 3                                                           |
| 54414  | SIAE     | sialic acid acetyltransferase                                                           |
| 56851  | C15orf24 | chromosome 15 open reading frame 24                                                     |
| 7045   | TGFB1    | transforming growth factor, beta-induced, 68kDa                                         |
| 1603   | DAD1     | defender against cell death 1                                                           |
| 2876   | GPX1     | glutathione peroxidase 1                                                                |
| 170692 | ADAMTS18 | ADAM metalloproteinase with thrombospondin type 1 motif, 18                             |
| 2287   | FKBP3    | FK506 binding protein 3, 25kDa                                                          |
| 201895 | C4orf34  | chromosome 4 open reading frame 34                                                      |
| 84293  | C10orf58 | chromosome 10 open reading frame 58                                                     |
| 27240  | SIT1     | signaling threshold regulating transmembrane adaptor 1                                  |
| 641649 | TMEM91   | transmembrane protein 91                                                                |
| 166614 | DCLK2    | doublecortin-like kinase 2                                                              |
| 79443  | FYCO1    | FYVE and coiled-coil domain containing 1                                                |
| 6208   | RPS14    | ribosomal protein S14                                                                   |
| 7411   | VBP1     | von Hippel-Lindau binding protein 1                                                     |
| 9117   | SEC22C   | SEC22 vesicle trafficking protein homolog C (S. cerevisiae)                             |
| 27130  | INVS     | inversin                                                                                |
| 2030   | SLC29A1  | solute carrier family 29 (nucleoside transporters), member 1                            |
| 170960 | ZNF721   | zinc finger protein 721                                                                 |
| 3111   | HLA-DOA  | major histocompatibility complex, class II, DO alpha                                    |
| 5134   | PDCD2    | programmed cell death 2                                                                 |
| 23303  | KIF13B   | kinesin family member 13B                                                               |
| 5037   | PEBP1    | phosphatidylethanolamine binding protein 1                                              |
| 2194   | FASN     | fatty acid synthase                                                                     |
| 1019   | CDK4     | cyclin-dependent kinase 4                                                               |
| 9804   | TOMM20   | translocase of outer mitochondrial membrane 20 homolog (yeast)                          |
| 79174  | CRELD2   | cysteine-rich with EGF-like domains 2                                                   |
| 30968  | STOML2   | stomatin (EPB72)-like 2                                                                 |
| 641638 | SNHG6    | small nucleolar RNA host gene 6 (non-protein coding)                                    |
| 10576  | CCT2     | chaperonin containing TCP1, subunit 2 (beta)                                            |
| 8564   | KMO      | kynurenine 3-monooxygenase (kynurenine 3-hydroxylase)                                   |
| 256586 | LYSMD2   | LysM, putative peptidoglycan-binding, domain containing 2                               |
| 51602  | NOP58    | NOP58 ribonucleoprotein homolog (yeast)                                                 |
| 6235   | RPS29    | ribosomal protein S29                                                                   |
| 5445   | PON2     | paraoxonase 2                                                                           |
| 57037  | ANKMY2   | ankyrin repeat and MYND domain containing 2                                             |
| 6640   | SNTA1    | syntrophin, alpha 1 (dystrophin-associated protein A1, 59kDa, acidic component)         |
| 6206   | RPS12    | ribosomal protein S12                                                                   |
| 81853  | TMEM14B  | transmembrane protein 14B                                                               |
| 26060  | APPL1    | adaptor protein, phosphotyrosine interaction, PH domain and leucine zipper containing 1 |
| 10455  | PECI     | peroxisomal D3,D2-enoyl-CoA isomerase                                                   |
| 23244  | PDS5A    | PDS5, regulator of cohesion maintenance, homolog A (S. cerevisiae)                      |
| 3916   | LAMP1    | lysosomal-associated membrane protein 1                                                 |

#### pDC (downregulated genes)

| ENTREZ ID | Gene Symbol | Gene Name                                                                                |
|-----------|-------------|------------------------------------------------------------------------------------------|
| 1318      | SLC31A2     | solute carrier family 31 (copper transporters), member 2                                 |
| 126014    | OSCAR       | osteoclast associated, immunoglobulin-like receptor                                      |
| 6252      | RTN1        | reticulin 1                                                                              |
| 408       | ARRB1       | arrestin, beta 1                                                                         |
| 10410     | IFITM3      | interferon induced transmembrane protein 3 (1-8U)                                        |
| 5265      | SERPINA1    | serpin peptidase inhibitor, clade A (alpha-1 antitrypsin), member 1                      |
| 51311     | TLR8        | toll-like receptor 8                                                                     |
| 9780      | FAM38A      | family with sequence similarity 38, member A                                             |
| 54438     | GFOD1       | glucose-fructose oxidoreductase domain containing 1                                      |
| 80727     | TTYH3       | tweety homolog 3 (Drosophila)                                                            |
| 55509     | BATF3       | basic leucine zipper transcription factor, ATF-like 3                                    |
| 7791      | ZYX         | zyxin                                                                                    |
| 1465      | CSRP1       | cysteine and glycine-rich protein 1                                                      |
| 7764      | ZNF217      | zinc finger protein 217                                                                  |
| 55803     | ADAP2       | ArfGAP with dual PH domains 2                                                            |
| 2720      | GLB1        | galactosidase, beta 1                                                                    |
| 3311      | HSPA7       | heat shock 70kDa protein 7 (HSP70B)                                                      |
| 114769    | CARD16      | caspase recruitment domain family, member 16                                             |
| 11025     | LILRB3      | leukocyte immunoglobulin-like receptor, subfamily B (with TM and ITIM domains), member 3 |
| 9046      | DOK2        | docking protein 2, 56kDa                                                                 |
| 1102      | RCBTB2      | regulator of chromosome condensation (RCC1) and BTB (POZ) domain containing protein 2    |
| 2040      | STOM        | stomatin                                                                                 |
| 27287     | VENTX       | VENT homeobox homolog (Xenopus laevis)                                                   |
| 5732      | PTGER2      | prostaglandin E receptor 2 (subtype EP2), 53kDa                                          |
| 10981     | RAB32       | RAB32, member RAS oncogene family                                                        |
| 10970     | CKAP4       | cytoskeleton-associated protein 4                                                        |
| 79168     | LILRA6      | leukocyte immunoglobulin-like receptor, subfamily A (with TM domain), member 6           |
| 1051      | CEBPB       | CCAAT/enhancer binding protein (C/EBP), beta                                             |
| 7462      | LAT2        | linker for activation of T cells family, member 2                                        |
| 121551    | BTBD11      | BTB (POZ) domain containing 11                                                           |
| 79901     | CYBRD1      | cytochrome b reductase 1                                                                 |
| 3098      | HK1         | hexokinase 1                                                                             |
| 10154     | PLXNC1      | plexin C1                                                                                |
| 5899      | RALB        | v-ral simian leukemia viral oncogene homolog B (ras related; GTP binding protein)        |
| 59        | ACTA2       | actin, alpha 2, smooth muscle, aorta                                                     |
| 3176      | H1MT        | histamine N-methyltransferase                                                            |
| 10439     | OLFM1       | olfactomedin 1                                                                           |
| 79720     | VPS37B      | vacuolar protein sorting 37 homolog B (S. cerevisiae)                                    |
| 4627      | MYH9        | myosin, heavy chain 9, non-muscle                                                        |
| 10422     | UBAC1       | UBA domain containing 1                                                                  |
| 706       | TSPO        | translocator protein (18kDa)                                                             |
| 64135     | IFIH1       | interferon induced with helicase C domain 1                                              |
| 6237      | RRAS        | related RAS viral (r-ras) oncogene homolog                                               |
| 2869      | GRK5        | G protein-coupled receptor kinase 5                                                      |
| 2665      | GDI2        | GDP dissociation inhibitor 2                                                             |
| 837       | CASP4       | caspase 4, apoptosis-related cysteine peptidase                                          |
| 137835    | TMEM71      | transmembrane protein 71                                                                 |
| 64411     | ARAP3       | ArfGAP with RhoGAP domain, ankyrin repeat and PH domain 3                                |

|        |           |                                                                                                                |
|--------|-----------|----------------------------------------------------------------------------------------------------------------|
| 3660   | IRF2      | interferon regulatory factor 2                                                                                 |
| 375387 | LRRK33    | leucine rich repeat containing 33                                                                              |
| 55365  | TMEM176A  | transmembrane protein 176A                                                                                     |
| 490    | ATP2B1    | ATPase, Ca <sup>++</sup> transporting, plasma membrane 1                                                       |
| 8462   | KLF11     | Kruppel-like factor 11                                                                                         |
| 3490   | IGFBP7    | insulin-like growth factor binding protein 7                                                                   |
| 11275  | KLHL2     | kelch-like 2, Mayven (Drosophila)                                                                              |
| 11213  | IRAK3     | interleukin-1 receptor-associated kinase 3                                                                     |
| 91663  | MYADM     | myeloid-associated differentiation marker                                                                      |
| 53     | ACP2      | acid phosphatase 2, lysosomal                                                                                  |
| 2634   | GBP2      | guanylate binding protein 2, interferon-inducible                                                              |
| 23208  | SYT11     | synaptotagmin XI                                                                                               |
| 7408   | VASP      | vasodilator-stimulated phosphoprotein                                                                          |
| 8495   | PPFIBP2   | PTPRF interacting protein, binding protein 2 (liprin beta 2)                                                   |
| 1462   | VCAN      | versican                                                                                                       |
| 5719   | PSMD13    | proteasome (prosome, macropain) 26S subunit, non-ATPase, 13                                                    |
| 3628   | INPP1     | inositol polyphosphate-1-phosphatase                                                                           |
| 80301  | PLEKH02   | pleckstrin homology domain containing, family O member 2                                                       |
| 2852   | GPER      | G protein-coupled estrogen receptor 1                                                                          |
| 5210   | PFKFB4    | 6-phosphofructo-2-kinase/fructose-2,6-biphosphatase 4                                                          |
| 4673   | NAP1L1    | nucleosome assembly protein 1-like 1                                                                           |
| 55129  | ANO10     | anoctamin 10                                                                                                   |
| 23240  | KIAA0922  | KIAA0922                                                                                                       |
| 57761  | TRIB3     | tribbles homolog 3 (Drosophila)                                                                                |
| 463    | ZFX3      | zinc finger homeobox 3                                                                                         |
| 64127  | NOD2      | nucleotide-binding oligomerization domain containing 2                                                         |
| 54453  | RIN2      | Ras and Rab interactor 2                                                                                       |
| 2534   | FYN       | FYN oncogene related to SRC, FGR, YES                                                                          |
| 5724   | PTAFR     | platelet-activating factor receptor                                                                            |
| 83666  | PARP9     | poly (ADP-ribose) polymerase family, member 9                                                                  |
| 2037   | EPB41L2   | erythrocyte membrane protein band 4.1-like 2                                                                   |
| 80256  | KIAA1539  | KIAA1539                                                                                                       |
| 79026  | AHNAK     | AHNAK nucleoprotein                                                                                            |
| 6050   | RNH1      | ribonuclease/angiogenin inhibitor 1                                                                            |
| 7168   | TPM1      | tropomyosin 1 (alpha)                                                                                          |
| 57182  | ANKRD50   | ankyrin repeat domain 50                                                                                       |
| 6453   | ITSN1     | intersectin 1 (SH3 domain protein)                                                                             |
| 10096  | ACTR3     | ARP3 actin-related protein 3 homolog (yeast)                                                                   |
| 58475  | MSA47     | membrane-spanning 4-domains, subfamily A, member 7                                                             |
| 11033  | ADAP1     | ArfGAP with dual PH domains 1                                                                                  |
| 146223 | CMTM4     | CKLF-like MARVEL transmembrane domain containing 4                                                             |
| 55841  | WWC3      | WWC family member 3                                                                                            |
| 51155  | HN1       | hematological and neurological expressed 1                                                                     |
| 834    | CASP1     | caspase 1, apoptosis-related cysteine peptidase (interleukin 1, beta, convertase)                              |
| 3636   | INPPL1    | inositol polyphosphate phosphatase-like 1                                                                      |
| 57498  | KIDINS220 | kinase D-interacting substrate, 220kDa                                                                         |
| 2633   | GBP1      | guanylate binding protein 1, interferon-inducible                                                              |
| 10908  | PNPLA6    | patatin-like phospholipase domain containing 6                                                                 |
| 929    | CD14      | CD14 molecule                                                                                                  |
| 9051   | PSTPIP1   | proline-serine-threonine phosphatase interacting protein 1                                                     |
| 138151 | NACC2     | NACC family member 2, BEN and BTB (POZ) domain containing                                                      |
| 10811  | NOXA1     | NADPH oxidase activator 1                                                                                      |
| 54930  | HAUS4     | HAUS augmin-like complex, subunit 4                                                                            |
| 255919 | TMEM188   | transmembrane protein 188                                                                                      |
| 8795   | TNFRSF10B | tumor necrosis factor receptor superfamily, member 10b                                                         |
| 64218  | SEMA4A    | sema domain, immunoglobulin domain(Ig), transmembrane domain(TM) and short cytoplasmic domain, (semaphorin) 4A |
| 6821   | SUOX      | sulfite oxidase                                                                                                |
| 3459   | IFNGR1    | interferon gamma receptor 1                                                                                    |
| 2537   | IFI6      | interferon, alpha-inducible protein 6                                                                          |
| 6102   | RP2       | retinitis pigmentosa 2 (X-linked recessive)                                                                    |
| 84689  | MS4A14    | membrane-spanning 4-domains, subfamily A, member 14                                                            |
| 404636 | FAM45A    | family with sequence similarity 45, member A                                                                   |
| 29992  | PILRA     | paired immunoglobulin-like type 2 receptor alpha                                                               |
| 3687   | ITGAX     | integrin, alpha X (complement component 3 receptor 4 subunit)                                                  |
| 9960   | USP3      | ubiquitin specific peptidase 3                                                                                 |
| 116985 | ARAP1     | ArfGAP with RhoGAP domain, ankyrin repeat and PH domain 1                                                      |
| 284611 | FAM102B   | family with sequence similarity 102, member B                                                                  |
| 441455 | LOC441455 | makorin ring finger protein 1 pseudogene                                                                       |
| 824    | CAPN2     | calpain 2, (m/l) large subunit                                                                                 |
| 55654  | TMEM127   | transmembrane protein 127                                                                                      |
| 219855 | SLC37A2   | solute carrier family 37 (glycerol-3-phosphate transporter), member 2                                          |
| 4303   | FOXO4     | forkhead box O4                                                                                                |
| 7384   | UQCRC1    | ubiquinol-cytochrome c reductase core protein I                                                                |
| 84926  | SPRYD3    | SPRY domain containing 3                                                                                       |
| 1050   | CEBPA     | C/CAAT/enhancer binding protein (C/EBP), alpha                                                                 |
| 57190  | SEPN1     | selenoprotein N, 1                                                                                             |
| 54103  | PION      | pigeon homolog (Drosophila)                                                                                    |
| 9061   | PAPSS1    | 3'-phosphoadenosine 5'-phosphosulfate synthase 1                                                               |
| 147040 | KCTD11    | potassium channel tetramerisation domain containing 11                                                         |
| 54625  | PARP14    | poly (ADP-ribose) polymerase family, member 14                                                                 |
| 25911  | DPCD      | deleted in primary ciliary dyskinesia homolog (mouse)                                                          |
| 26118  | WSB1      | WD repeat and SOCS box containing 1                                                                            |
| 6993   | DYNLT1    | dynein, light chain, Tctex-type 1                                                                              |
| 6132   | RPL8      | ribosomal protein L8                                                                                           |
| 79154  | DHRS11    | dehydrogenase/reductase (SDR family) member 11                                                                 |
| 8519   | IFITM1    | interferon induced transmembrane protein 1 (9-27)                                                              |
| 8099   | CDK2AP1   | cyclin-dependent kinase 2 associated protein 1                                                                 |
| 64422  | ATG3      | ATG3 autophagy related 3 homolog (S. cerevisiae)                                                               |
| 5862   | RAB2A     | RAB2A, member RAS oncogene family                                                                              |
| 26750  | RPS6KC1   | ribosomal protein S6 kinase, 52kDa, polypeptide 1                                                              |
| 29948  | OSGIN1    | oxidative stress induced growth inhibitor 1                                                                    |
| 10170  | DHRS9     | dehydrogenase/reductase (SDR family) member 9                                                                  |
| 2014   | EMP3      | epithelial membrane protein 3                                                                                  |
| 7456   | WIPF1     | WAS/WASL interacting protein family, member 1                                                                  |
| 3148   | HMGB2     | high-mobility group box 2                                                                                      |



|        |           |                                                                                              |
|--------|-----------|----------------------------------------------------------------------------------------------|
| 9997   | SCO2      | SCO cytochrome oxidase deficient homolog 2 (yeast)                                           |
| 7263   | TST       | thiosulfate sulfurtransferase (rhodanese)                                                    |
| 10205  | MPZL2     | myelin protein zero-like 2                                                                   |
| 196383 | RILPL2    | Rab interacting lysosomal protein-like 2                                                     |
| 293    | SLC25A6   | solute carrier family 25 (mitochondrial carrier; adenine nucleotide translocator), member 6  |
| 1871   | E2F3      | E2F transcription factor 3                                                                   |
| 29097  | CNIH4     | cornichon homolog 4 (Drosophila)                                                             |
| 280655 | C14orf19  | immunoglobulin (CD79A) binding protein 1 pseudogene                                          |
| 5351   | PLOD1     | procollagen-lysine 1, 2-oxoglutarate 5-dioxygenase 1                                         |
| 11046  | SLC35D2   | solute carrier family 35, member D2                                                          |
| 53346  | TM6SF1    | transmembrane 6 superfamily member 1                                                         |
| 808    | CALM3     | calmodulin 3 (phosphorylase kinase, delta)                                                   |
| 64326  | RFWD2     | ring finger and WD repeat domain 2                                                           |
| 57118  | CAMK1D    | calcium/calmodulin-dependent protein kinase ID                                               |
| 55093  | WDYHV1    | WDYHV motif containing 1                                                                     |
| 3784   | KCNQ1     | potassium voltage-gated channel, KQT-like subfamily, member 1                                |
| 22918  | CD93      | CD93 molecule                                                                                |
| 943    | TNFRSF8   | tumor necrosis factor receptor superfamily, member 8                                         |
| 1979   | EIF4EBP2  | eukaryotic translation initiation factor 4E binding protein 2                                |
| 829    | CAPZA1    | capping protein (actin filament) muscle Z-line, alpha 1                                      |
| 83541  | FAM110A   | family with sequence similarity 110, member A                                                |
| 57616  | TSHZ3     | teashirt zinc finger homeobox 3                                                              |
| 26136  | TES       | testis derived transcript (3 LIM domains)                                                    |
| 8650   | NUMB      | numb homolog (Drosophila)                                                                    |
| 5912   | RAP2B     | RAP2B, member of RAS oncogene family                                                         |
| 10581  | IFITM2    | interferon induced transmembrane protein 2 (1-8D)                                            |
| 9470   | EIF4E2    | eukaryotic translation initiation factor 4E family member 2                                  |
| 3759   | KCNJ2     | potassium inwardly-rectifying channel, subfamily J, member 2                                 |
| 88455  | ANKRD13A  | ankyrin repeat domain 13A                                                                    |
| 23608  | MKRN1     | makorin ring finger protein 1                                                                |
| 23167  | EFR3A     | EFR3 homolog A (S. cerevisiae)                                                               |
| 7170   | TPM3      | tropomyosin 3                                                                                |
| 4126   | MANBA     | mannosidase, beta A, lysosomal                                                               |
| 8445   | DYRK2     | dual-specificity tyrosine-(Y)-phosphorylation regulated kinase 2                             |
| 5165   | PDK3      | pyruvate dehydrogenase kinase, isozyme 3                                                     |
| 3936   | LCP1      | lymphocyte cytosolic protein 1 (L-plastin)                                                   |
| 91351  | DDX60L    | DEAD (Asp-Glu-Ala-Asp) box polypeptide 60-like                                               |
| 8772   | FADD      | Fas (TNFRSF6)-associated via death domain                                                    |
| 51734  | SEPX1     | selenoprotein X, 1                                                                           |
| 115948 | CCDC151   | coiled-coil domain containing 151                                                            |
| 5768   | QSOX1     | quiescin Q6 sulfhydryl oxidase 1                                                             |
| 80896  | NPL       | N-acetylneuraminatase pyruvate lyase (dihydropicolinate synthase)                            |
| 1876   | E2F6      | E2F transcription factor 6                                                                   |
| 25979  | DHRS7B    | dehydrogenase/reductase (SDR family) member 7B                                               |
| 64114  | TMBIM1    | transmembrane BAX inhibitor motif containing 1                                               |
| 54507  | ADAMTSL4  | ADAMTS-like 4                                                                                |
| 845    | CASQ2     | calsequestrin 2 (cardiac muscle)                                                             |
| 1534   | CYB561    | cytochrome b-561                                                                             |
| 23526  | HMHA1     | histocompatibility (minor) HA-1                                                              |
| 2950   | GSTP1     | glutathione S-transferase pi 1                                                               |
| 6778   | STAT6     | signal transducer and activator of transcription 6, interleukin-4 induced                    |
| 909    | CD1A      | CD1a molecule                                                                                |
| 51092  | SID2      | SID1 transmembrane family, member 2                                                          |
| 10924  | SMPDL3A   | sphingomyelin phosphodiesterase, acid-like 3A                                                |
| 5223   | PGAM1     | phosphoglycerate mutase 1 (brain)                                                            |
| 3516   | RBPJ      | recombination signal binding protein for immunoglobulin kappa J region                       |
| 80025  | PANK2     | pantothenate kinase 2                                                                        |
| 7099   | TLR4      | toll-like receptor 4                                                                         |
| 9213   | XPR1      | xenotropic and polytropic retrovirus receptor 1                                              |
| 85440  | DOCK7     | dedicator of cytokinesis 7                                                                   |
| 90007  | MIDN      | midnolin                                                                                     |
| 6277   | S100A6    | S100 calcium binding protein A6                                                              |
| 57142  | RTN4      | reticulin 4                                                                                  |
| 8819   | SAP30     | Sin3A-associated protein, 30kDa                                                              |
| 9446   | GSTO1     | glutathione S-transferase omega 1                                                            |
| 56894  | AGPAT3    | 1-acylglycerol-3-phosphate O-acyltransferase 3                                               |
| 144402 | CPNE8     | copine VIII                                                                                  |
| 5689   | PSMB1     | proteasome (prosome, macropain) subunit, beta type, 1                                        |
| 246175 | CNOT6L    | CCR4-NOT transcription complex, subunit 6-like                                               |
| 60682  | SMAP1     | small ArfGAP 1                                                                               |
| 5728   | PTEN      | phosphatase and tensin homolog                                                               |
| 4061   | LY6E      | lymphocyte antigen 6 complex, locus E                                                        |
| 11261  | CHP       | calcium binding protein P22                                                                  |
| 115548 | FCHO2     | FCH domain only 2                                                                            |
| 2783   | GNB2      | guanine nucleotide binding protein (G protein), beta polypeptide 2                           |
| 158747 | MOSPD2    | motile sperm domain containing 2                                                             |
| 81556  | C15orf44  | chromosome 15 open reading frame 44                                                          |
| 11018  | TMED1     | transmembrane emp24 protein transport domain containing 1                                    |
| 1139   | CHRNA7    | cholinergic receptor, nicotinic, alpha 7                                                     |
| 10890  | RAB10     | RAB10, member RAS oncogene family                                                            |
| 57590  | WDFY1     | WD repeat and FYVE domain containing 1                                                       |
| 3688   | ITGB1     | integrin, beta 1 (fibronectin receptor, beta polypeptide, antigen CD29 includes MDF2, MSK12) |
| 4609   | MYC       | v-myc myelocytomatosis viral oncogene homolog (avian)                                        |
| 3949   | LDLR      | low density lipoprotein receptor                                                             |
| 3707   | ITPKB     | inositol 1,4,5-trisphosphate 3-kinase B                                                      |
| 114548 | NLRP3     | NLR family, pyrin domain containing 3                                                        |
| 84173  | ELMOD3    | ELMO/CED-12 domain containing 3                                                              |
| 867    | CBL       | Cas-Br-M (murine) ecotropic retroviral transforming sequence                                 |
| 5595   | MAPK3     | mitogen-activated protein kinase 3                                                           |
| 284    | ANGPT1    | angiopoietin 1                                                                               |
| 5664   | PSEN2     | presenilin 2 (Alzheimer disease 4)                                                           |
| 4173   | MCM4      | minichromosome maintenance complex component 4                                               |
| 646214 | LOC646214 | p21 protein (Cdc42/Rac)-activated kinase 2 pseudogene                                        |
| 83693  | HSDL1     | hydroxysteroid dehydrogenase like 1                                                          |
| 10092  | ARPC5     | actin related protein 2/3 complex, subunit 5, 16kDa                                          |

|        |            |                                                                                                |
|--------|------------|------------------------------------------------------------------------------------------------|
| 474338 | SUMO1P3    | SUMO1 pseudogene 3                                                                             |
| 2675   | GFRA2      | GDNF family receptor alpha 2                                                                   |
| 3957   | LGALS2     | lectin, galactoside-binding, soluble, 2                                                        |
| 55022  | PID1       | phosphotyrosine interaction domain containing 1                                                |
| 157    | ADRBK2     | adrenergic, beta, receptor kinase 2                                                            |
| 55839  | CENPN      | centromere protein N                                                                           |
| 283219 | KCTD21     | potassium channel tetramerisation domain containing 21                                         |
| 2995   | GYPC       | glycophorin C (Gerbich blood group)                                                            |
| 2685   | GRB2       | growth factor receptor-bound protein 2                                                         |
| 8761   | PABPC4     | poly(A) binding protein, cytoplasmic 4 (inducible form)                                        |
| 112812 | FDX1L      | ferredoxin 1-like                                                                              |
| 262    | AMD1       | adenosylmethionine decarboxylase 1                                                             |
| 55911  | APOBR      | apolipoprotein B receptor                                                                      |
| 26184  | OR1F2P     | olfactory receptor, family 1, subfamily F, member 2                                            |
| 116988 | AGAP3      | ArfGAP with GTPase domain, ankyrin repeat and PH domain 3                                      |
| 6261   | RYR1       | ryanodine receptor 1 (skeletal)                                                                |
| 9262   | STK17B     | serine/threonine kinase 17b                                                                    |
| 9935   | MAFB       | v-maf musculoaponeurotic fibrosarcoma oncogene homolog B (avian)                               |
| 57600  | FNIP2      | folliculin interacting protein 2                                                               |
| 161742 | SPRED1     | sprouty-related, EVH1 domain containing 1                                                      |
| 130589 | GALM       | galactose mutarotase (aldose 1-epimerase)                                                      |
| 3418   | IDH2       | isocitrate dehydrogenase 2 (NADP+), mitochondrial                                              |
| 4744   | NEFH       | neurofilament, heavy polypeptide                                                               |
| 4682   | NUBP1      | nucleotide binding protein 1 (MinD homolog, E. coli)                                           |
| 5291   | PIK3CB     | phosphoinositide-3-kinase, catalytic, beta polypeptide                                         |
| 7132   | TNFRSF1A   | tumor necrosis factor receptor superfamily, member 1A                                          |
| 5523   | PPP2R3A    | protein phosphatase 2, regulatory subunit B', alpha                                            |
| 5326   | PLAGL2     | pleiomorphic adenoma gene-like 2                                                               |
| 63910  | SLC17A9    | solute carrier family 17, member 9                                                             |
| 6397   | SEC14L1    | SEC14-like 1 (S. cerevisiae)                                                                   |
| 51304  | ZDHHC3     | zinc finger, DHHC-type containing 3                                                            |
| 29116  | MYLIP      | myosin regulatory light chain interacting protein                                              |
| 8520   | HAT1       | histone acetyltransferase 1                                                                    |
| 1105   | CHD1       | chromodomain helicase DNA binding protein 1                                                    |
| 51312  | SLC25A37   | solute carrier family 25, member 37                                                            |
| 166929 | SGMS2      | sphingomyelin synthase 2                                                                       |
| 171586 | ABHD3      | abhydrolase domain containing 3                                                                |
| 55276  | PGM2       | phosphoglucomutase 2                                                                           |
| 9826   | ARHGEF11   | Rho guanine nucleotide exchange factor (GEF) 11                                                |
| 2859   | GPR35      | G protein-coupled receptor 35                                                                  |
| 6814   | STXBP3     | syntaxin binding protein 3                                                                     |
| 10866  | HCP5       | HLA complex P5                                                                                 |
| 4354   | MPP1       | membrane protein, palmitoylated 1, 55kDa                                                       |
| 5705   | PSMC5      | proteasome (prosome, macropain) 26S subunit, ATPase, 5                                         |
| 25966  | C2CD2      | C2 calcium-dependent domain containing 2                                                       |
| 441212 | RP9P       | retinitis pigmentosa 9 pseudogene                                                              |
| 2526   | FUT4       | fucosyltransferase 4 (alpha (1,3) fucosyltransferase, myeloid-specific)                        |
| 6051   | RNPEP      | arginyl aminopeptidase (aminopeptidase B)                                                      |
| 10062  | NR1H3      | nuclear receptor subfamily 1, group H, member 3                                                |
| 10542  | HBXIP      | hepatitis B virus x interacting protein                                                        |
| 1436   | CSF1R      | colony stimulating factor 1 receptor                                                           |
| 54861  | SNRK       | SNF related kinase                                                                             |
| 5606   | MAP2K3     | mitogen-activated protein kinase kinase 3                                                      |
| 51280  | GOLM1      | golgi membrane protein 1                                                                       |
| 689    | BTF3       | basic transcription factor 3                                                                   |
| 8932   | MBD2       | methyl-CpG binding domain protein 2                                                            |
| 5184   | PEPD       | peptidase D                                                                                    |
| 637    | BID        | BH3 interacting domain death agonist                                                           |
| 246330 | PELI3      | pellino homolog 3 (Drosophila)                                                                 |
| 59269  | HIVEP3     | human immunodeficiency virus type I enhancer binding protein 3                                 |
| 23416  | KCNH3      | potassium voltage-gated channel, subfamily H (eag-related), member 3                           |
| 9592   | IER2       | immediate early response 2                                                                     |
| 387    | RHOA       | ras homolog gene family, member A                                                              |
| 201627 | FAM116A    | family with sequence similarity 116, member A                                                  |
| 27106  | ARRDC2     | arrestin domain containing 2                                                                   |
| 79801  | SHCBP1     | SHC SH2-domain binding protein 1                                                               |
| 476    | ATP1A1     | ATPase, Na+/K+ transporting, alpha 1 polypeptide                                               |
| 151636 | DTX3L      | deltex 3-like (Drosophila)                                                                     |
| 3110   | MNX1       | motor neuron and pancreas homeobox 1                                                           |
| 8869   | ST3GAL5    | ST3 beta-galactoside alpha-2,3-sialyltransferase 5                                             |
| 80867  | HCG2P7     | HLA complex group 2 pseudogene 7                                                               |
| 619434 | NCRNA00051 | non-protein coding RNA 51                                                                      |
| 6813   | STXBP2     | syntaxin binding protein 2                                                                     |
| 55625  | ZDHHC7     | zinc finger, DHHC-type containing 7                                                            |
| 3344   | FOXN2      | forkhead box N2                                                                                |
| 123    | PLIN2      | perilipin 2                                                                                    |
| 64795  | RMND5A     | required for meiotic nuclear division 5 homolog A (S. cerevisiae)                              |
| 8714   | ABCC3      | ATP-binding cassette, sub-family C (CFTR/MRP), member 3                                        |
| 10004  | NAALADL1   | N-acetylated alpha-linked acidic dipeptidase-like 1                                            |
| 1298   | COL9A2     | collagen, type IX, alpha 2                                                                     |
| 60481  | ELOVL5     | ELOVL family member 5, elongation of long chain fatty acids (FEN1/Elo2, SUR4/Elo3-like, yeast) |
| 10673  | TNFSF13B   | tumor necrosis factor (ligand) superfamily, member 13b                                         |
| 126272 | EID2B      | EP300 interacting inhibitor of differentiation 2B                                              |
| 25946  | ZNF385A    | zinc finger protein 385A                                                                       |
| 23646  | PLD3       | phospholipase D family, member 3                                                               |
| 9025   | RNF8       | ring finger protein 8                                                                          |
| 57826  | RAP2C      | RAP2C, member of RAS oncogene family                                                           |
| 643418 | LIPN       | lipase, family member N                                                                        |
| 142679 | DUSP19     | dual specificity phosphatase 19                                                                |
| 6556   | SLC11A1    | solute carrier family 11 (proton-coupled divalent metal ion transporters), member 1            |
| 55357  | TBC1D2     | TBC1 domain family, member 2                                                                   |
| 25977  | NECAP1     | NECAP endocytosis associated 1                                                                 |
| 57669  | EPB41L5    | erythrocyte membrane protein band 4.1 like 5                                                   |
| 8718   | TNFRSF25   | tumor necrosis factor receptor superfamily, member 25                                          |
| 747    | DAGLA      | diacylglycerol lipase, alpha                                                                   |

|           |            |                                                                                                             |
|-----------|------------|-------------------------------------------------------------------------------------------------------------|
| 79847     | TMEM180    | transmembrane protein 180                                                                                   |
| 55619     | DOCK10     | dedicator of cytokinesis 10                                                                                 |
| 1991      | ELANE      | elastase, neutrophil expressed                                                                              |
| 25849     | PARM1      | prostate androgen-regulated mucin-like protein 1                                                            |
| 833       | CARS       | cysteinyl-tRNA synthetase                                                                                   |
| 7528      | YY1        | YY1 transcription factor                                                                                    |
| 317781    | DDX51      | DEAD (Asp-Glu-Ala-Asp) box polypeptide 51                                                                   |
| 29979     | UBQLN1     | ubiquilin 1                                                                                                 |
| 4117      | MAK        | male germ cell-associated kinase                                                                            |
| 10288     | LILRB2     | leukocyte immunoglobulin-like receptor, subfamily B (with TM and ITIM domains), member 2                    |
| 5783      | PTPN13     | protein tyrosine phosphatase, non-receptor type 13 (APO-1/CD95 (Fas)-associated phosphatase)                |
| 6948      | TCN2       | transcobalamin II                                                                                           |
| 10634     | GAS2L1     | growth arrest-specific 2 like 1                                                                             |
| 84255     | SLC37A3    | solute carrier family 37 (glycerol-3-phosphate transporter), member 3                                       |
| 23474     | ETHE1      | ethylmalonic encephalopathy 1                                                                               |
| 116372    | LYPD1      | LY6/PLAUR domain containing 1                                                                               |
| 91543     | RSAD2      | radical S-adenosyl methionine domain containing 2                                                           |
| 5585      | PKN1       | protein kinase N1                                                                                           |
| 911       | CD1C       | CD1c molecule                                                                                               |
| 84067     | FAM160A2   | family with sequence similarity 160, member A2                                                              |
| 54210     | TREM1      | triggering receptor expressed on myeloid cells 1                                                            |
| 26030     | PLEKHG3    | pleckstrin homology domain containing, family G (with RhoGef domain) member 3                               |
| 23623     | RUSC1      | RUN and SH3 domain containing 1                                                                             |
| 7106      | TSPAN4     | tetraspanin 4                                                                                               |
| 286077    | FAM83H     | family with sequence similarity 83, member H                                                                |
| 57493     | HEG1       | HEG homolog 1 (zebrafish)                                                                                   |
| 285533    | RNF175     | ring finger protein 175                                                                                     |
| 54458     | PRR13      | proline rich 13                                                                                             |
| 57486     | NLN        | neurolysin (metallopeptidase M3 family)                                                                     |
| 113791    | PIK3IP1    | phosphoinositide-3-kinase interacting protein 1                                                             |
| 157769    | FAM91A1    | family with sequence similarity 91, member A1                                                               |
| 8843      | GPR109B    | G protein-coupled receptor 109B                                                                             |
| 6674      | SPAG1      | sperm associated antigen 1                                                                                  |
| 79888     | LPCAT1     | lysophosphatidylcholine acyltransferase 1                                                                   |
| 338773    | TMEM119    | transmembrane protein 119                                                                                   |
| 53834     | FGFRL1     | fibroblast growth factor receptor-like 1                                                                    |
| 4651      | MYO10      | myosin X                                                                                                    |
| 9673      | SLC25A44   | solute carrier family 25, member 44                                                                         |
| 224       | ALDH3A2    | aldehyde dehydrogenase 3 family, member A2                                                                  |
| 388692    | LOC388692  | hypothetical LOC388692                                                                                      |
| 1066      | CES1       | carboxylesterase 1                                                                                          |
| 55723     | ASF1B      | ASF1 anti-silencing function 1 homolog B (S. cerevisiae)                                                    |
| 6583      | SLC22A4    | solute carrier family 22 (organic cation/ergothioneine transporter), member 4                               |
| 6840      | SVIL       | supervillin                                                                                                 |
| 117155    | CATSPER2   | cation channel, sperm associated 2                                                                          |
| 80139     | ZNF703     | zinc finger protein 703                                                                                     |
| 719       | C3AR1      | complement component 3a receptor 1                                                                          |
| 1958      | EGR1       | early growth response 1                                                                                     |
| 8685      | MARCO      | macrophage receptor with collagenous structure                                                              |
| 5621      | PRNP       | prion protein                                                                                               |
| 55711     | FAR2       | fatty acyl CoA reductase 2                                                                                  |
| 2857      | GPR34      | G protein-coupled receptor 34                                                                               |
| 8622      | PDE8B      | phosphodiesterase 8B                                                                                        |
| 360132    | FKBP9L     | FK506 binding protein 9-like                                                                                |
| 4283      | CXCL9      | chemokine (C-X-C motif) ligand 9                                                                            |
| 256435    | ST6GALNAC3 | ST6 (alpha-N-acetylneuraminy-2,3-beta-galactosyl-1,3)-N-acetylgalactosaminide alpha-2,6-sialyltransferase 3 |
| 10312     | TCIRG1     | T-cell, immune regulator 1, ATPase, H+ transporting, lysosomal V0 subunit A3                                |
| 319085    | ITPK1-AS1  | ITPK1 antisense RNA 1 (non-protein coding)                                                                  |
| 8634      | RTCD1      | RNA terminal phosphate cyclase domain 1                                                                     |
| 100132417 | FCGR1C     | Fc fragment of IgG, high affinity Ic, receptor (CD64)                                                       |
| 9119      | KRT75      | keratin 75                                                                                                  |
| 28959     | TMEM176B   | transmembrane protein 176B                                                                                  |
| 199675    | C19orf59   | chromosome 19 open reading frame 59                                                                         |
| 80129     | C6orf97    | chromosome 6 open reading frame 97                                                                          |
| 147372    | CCBE1      | collagen and calcium binding EGF domains 1                                                                  |
| 55760     | DHX32      | DEAH (Asp-Glu-Ala-His) box polypeptide 32                                                                   |
| 23491     | CES3       | carboxylesterase 3                                                                                          |
| 5222      | PGA5       | pepsinogen 5, group I (pepsinogen A)                                                                        |
| 54463     | FAM134B    | family with sequence similarity 134, member B                                                               |
| 90362     | FAM110B    | family with sequence similarity 110, member B                                                               |
| 23328     | SASH1      | SAM and SH3 domain containing 1                                                                             |
| 26798     | SNORD51    | small nucleolar RNA, C/D box 51                                                                             |
| 9397      | NMT2       | N-myristoyltransferase 2                                                                                    |
| 3382      | ICA1       | islet cell autoantigen 1, 69kDa                                                                             |
| 2983      | GUCY1B3    | guanylate cyclase 1, soluble, beta 3                                                                        |
| 23555     | TSPAN15    | tetraspanin 15                                                                                              |
| 60489     | APOBEC3G   | apolipoprotein B mRNA editing enzyme, catalytic polypeptide-like 3G                                         |
| 838       | CASP5      | caspase 5, apoptosis-related cysteine peptidase                                                             |
| 3422      | IDI1       | isopentenyl-diphosphate delta isomerase 1                                                                   |
| 84953     | MICALCL    | MICAL C-terminal like                                                                                       |
| 5140      | PDE3B      | phosphodiesterase 3B, cGMP-inhibited                                                                        |
| 388       | RHOB       | ras homolog gene family, member B                                                                           |
| 7704      | ZBTB16     | zinc finger and BTB domain containing 16                                                                    |
| 5333      | PLCD1      | phospholipase C, delta 1                                                                                    |
| 84179     | MFSD7      | major facilitator superfamily domain containing 7                                                           |
| 817       | CAMK2D     | calcium/calmodulin-dependent protein kinase II delta                                                        |
| 26031     | OSBPL3     | oxysterol binding protein-like 3                                                                            |
| 84446     | BRSK1      | BR serine/threonine kinase 1                                                                                |
| 147699    | PPM1N      | protein phosphatase, Mg2+/Mn2+ dependent, 1N (putative)                                                     |
| 55181     | C17orf71   | chromosome 17 open reading frame 71                                                                         |
| 657       | BMPR1A     | bone morphogenetic protein receptor, type IA                                                                |
| 57579     | FAM135A    | family with sequence similarity 135, member A                                                               |
| 55897     | MESP1      | mesoderm posterior 1 homolog (mouse)                                                                        |
| 89958     | C9orf140   | chromosome 9 open reading frame 140                                                                         |
| 58526     | MID1IP1    | MID1 interacting protein 1 (gastrulation specific G12 homolog (zebrafish))                                  |

|           |              |                                                                            |
|-----------|--------------|----------------------------------------------------------------------------|
| 441251    | SPDYE7P      | speedy homolog E7 ( <i>Xenopus laevis</i> ), pseudogene                    |
| 23639     | LRRC6        | leucine rich repeat containing 6                                           |
| 3426      | CFI          | complement factor I                                                        |
| 23046     | KIF21B       | kinesin family member 21B                                                  |
| 165530    | CLEC4F       | C-type lectin domain family 4, member F                                    |
| 6389      | SDHA         | succinate dehydrogenase complex, subunit A, flavoprotein (Fp)              |
| 9821      | RB1CC1       | RB1-inducible coiled-coil 1                                                |
| 83787     | ARMC10       | armadillo repeat containing 10                                             |
| 10461     | MERTK        | c-mer proto-oncogene tyrosine kinase                                       |
| 399761    | BMS1P5       | BMS1 pseudogene 5                                                          |
| 910       | CD1B         | CD1b molecule                                                              |
| 10544     | PROCR        | protein C receptor, endothelial                                            |
| 53826     | FXYD6        | FXYD domain containing ion transport regulator 6                           |
| 57591     | MKL1         | megakaryoblastic leukemia (translocation) 1                                |
| 4810      | NHS          | Nance-Horan syndrome (congenital cataracts and dental anomalies)           |
| 286333    | NCRNA00256A  | non-protein coding RNA 256A                                                |
| 348110    | C15orf38     | chromosome 15 open reading frame 38                                        |
| 2001      | ELF5         | E74-like factor 5 (ets domain transcription factor)                        |
| 10435     | CDC42EP2     | CDC42 effector protein (Rho GTPase binding) 2                              |
| 712       | C1QA         | complement component 1, q subcomponent, A chain                            |
| 5239      | PGM5         | phosphoglucomutase 5                                                       |
| 717       | C2           | complement component 2                                                     |
| 25903     | OLFML2B      | olfactomedin-like 2B                                                       |
| 2213      | FCGR2B       | Fc fragment of IgG, low affinity IIb, receptor (CD32)                      |
| 79762     | C1orf115     | chromosome 1 open reading frame 115                                        |
| 196996    | GRAMD2       | GRAM domain containing 2                                                   |
| 65124     | ANKRD57      | ankyrin repeat domain 57                                                   |
| 913       | CD1E         | CD1e molecule                                                              |
| 10855     | HPSE         | heparanase                                                                 |
| 1959      | EGR2         | early growth response 2                                                    |
| 113277    | TMEM106A     | transmembrane protein 106A                                                 |
| 57121     | LPAR5        | lysophosphatidic acid receptor 5                                           |
| 10863     | ADAM28       | ADAM metalloproteinase domain 28                                           |
| 9249      | DHRS3        | dehydrogenase/reductase (SDR family) member 3                              |
| 118932    | ANKRD22      | ankyrin repeat domain 22                                                   |
| 339390    | CLEC4G       | C-type lectin domain family 4, member G                                    |
| 222962    | SLC29A4      | solute carrier family 29 (nucleoside transporters), member 4               |
| 11279     | KLF8         | Kruppel-like factor 8                                                      |
| 81552     | VOPP1        | vesicular, overexpressed in cancer, prosurvival protein 1                  |
| 151011    | SEPT10       | septin 10                                                                  |
| 57010     | CABP4        | calcium binding protein 4                                                  |
| 3386      | ICAM4        | intercellular adhesion molecule 4 (Landsteiner-Wiener blood group)         |
| 9332      | CD163        | CD163 molecule                                                             |
| 9454      | HOMER3       | homer homolog 3 ( <i>Drosophila</i> )                                      |
| 2350      | FOLR2        | folate receptor 2 (fetal)                                                  |
| 29956     | LASS2        | LAG1 homolog, ceramide synthase 2                                          |
| 389634    | LOC389634    | hypothetical LOC389634                                                     |
| 11199     | ANXA10       | annexin A10                                                                |
| 5738      | PTGFRN       | prostaglandin F2 receptor negative regulator                               |
| 6934      | TCF7L2       | transcription factor 7-like 2 (T-cell specific, HMG-box)                   |
| 3815      | KIT          | v-kit Hardy-Zuckerman 4 feline sarcoma viral oncogene homolog              |
| 83716     | CRISPLD2     | cysteine-rich secretory protein LCCL domain containing 2                   |
| 84668     | FAM126A      | family with sequence similarity 126, member A                              |
| 9034      | CCRL2        | chemokine (C-C motif) receptor-like 2                                      |
| 23166     | STAB1        | stabilin 1                                                                 |
| 6355      | CCL8         | chemokine (C-C motif) ligand 8                                             |
| 4145      | MATK         | megakaryocyte-associated tyrosine kinase                                   |
| 150365    | MEI1         | meiosis inhibitor 1                                                        |
| 11326     | VSIG4        | V-set and immunoglobulin domain containing 4                               |
| 3581      | IL9R         | interleukin 9 receptor                                                     |
| 115290    | FBXO17       | F-box protein 17                                                           |
| 4640      | MYO1A        | myosin IA                                                                  |
| 117144    | CATSPER1     | cation channel, sperm associated 1                                         |
| 5159      | PDGFRB       | platelet-derived growth factor receptor, beta polypeptide                  |
| 344148    | NCKAP5       | NCK-associated protein 5                                                   |
| 338440    | ANO9         | anoctamin 9                                                                |
| 10666     | CD226        | CD226 molecule                                                             |
| 51474     | LIMA1        | LIM domain and actin binding 1                                             |
| 4023      | LPL          | lipoprotein lipase                                                         |
| 4923      | NTSR1        | neurotensin receptor 1 (high affinity)                                     |
| 5337      | PLD1         | phospholipase D1, phosphatidylcholine-specific                             |
| 84057     | MND1         | meiotic nuclear divisions 1 homolog ( <i>S. cerevisiae</i> )               |
| 79630     | C1orf54      | chromosome 1 open reading frame 54                                         |
| 79412     | KREMEN2      | kringle containing transmembrane protein 2                                 |
| 79971     | WLS          | wntless homolog ( <i>Drosophila</i> )                                      |
| 115123    | 03-Mar       | membrane-associated ring finger (C3HC4) 3                                  |
| 83988     | NCALD        | neurocalcin delta                                                          |
| 153769    | SH3RF2       | SH3 domain containing ring finger 2                                        |
| 3753      | KCNE1        | potassium voltage-gated channel, Isk-related family, member 1              |
| 4897      | NRCAM        | neuronal cell adhesion molecule                                            |
| 326342    | EMR4P        | egf-like module containing, mucin-like, hormone receptor-like 4 pseudogene |
| 55615     | PRR5         | proline rich 5 (renal)                                                     |
| 2048      | EPHB2        | EPH receptor B2                                                            |
| 100505501 | LOC100505501 | hypothetical LOC100505501                                                  |
| 4856      | NOV          | nephroblastoma overexpressed gene                                          |
| 1593      | CYP27A1      | cytochrome P450, family 27, subfamily A, polypeptide 1                     |
| 126669    | SHE          | Src homology 2 domain containing E                                         |
| 57447     | NDRG2        | NDRG family member 2                                                       |
| 1903      | S1PR3        | sphingosine-1-phosphate receptor 3                                         |
| 7450      | VWF          | von Willebrand factor                                                      |
| 51760     | SYT17        | synaptotagmin XVII                                                         |
| 5539      | PPY          | pancreatic polypeptide                                                     |
| 30835     | CD209        | CD209 molecule                                                             |
| 100288092 | LOC100288092 | hypothetical LOC100288092                                                  |
| 55384     | MEG3         | maternally expressed 3 (non-protein coding)                                |

|      |       |           |
|------|-------|-----------|
| 2199 | FBLN2 | fibulin 2 |
|------|-------|-----------|
